# Supplementary material for: Weak Interactions and Conformational Changes in Core-Protonated A2- and Ax-Type Porphyrin Dications
Source: PubMed Central journal article supplement (PMC7397311; doi:10.3390/molecules25143195), 2020-07-13
Supplement: molecules-25-03195-s001.pdf [file molecules-25-03195-s001.pdf]

# Supporting information for Weak interactions and conformational changes in core protonated A<sub>2</sub>- and A<sub>x</sub>-type porphyrin dications

Christopher J. Kingsbury, Keith J. Flanagan, Hans-Georg Eckhardt, Marc Kielmann and Mathias O. Senge\*

## Contents

|        |                                                                                                                                                                                                                             |    |
|--------|-----------------------------------------------------------------------------------------------------------------------------------------------------------------------------------------------------------------------------|----|
| S1.    | Tables of structure codes referenced in the statistical analyses .....                                                                                                                                                      | 4  |
| 1.1    | Table S1.1; Porphyrin diacid CCDC structure codes.....                                                                                                                                                                      | 4  |
| 1.2    | Table S1.2. 5,15-disubstituted and 5,10,15-trisubstituted porphyrin free base structure codes                                                                                                                               | 5  |
| S2.    | Single Crystal X-ray diffraction studies .....                                                                                                                                                                              | 6  |
| 2.1    | Details of disorder and deviation from general crystallographic procedure.....                                                                                                                                              | 6  |
| 2.1.1  | General disorder modelling .....                                                                                                                                                                                            | 6  |
| 2.1.2  | H <sub>2</sub> <b>11</b> ·CH <sub>2</sub> Cl <sub>2</sub> 5,15-Diphenylporphyrin DCM .....                                                                                                                                  | 6  |
| 2.1.3  | [H <sub>4</sub> <b>11</b> ][CF <sub>3</sub> CO <sub>2</sub> ] <sub>2</sub> 5,15-Diphenylporphyrindi-ium bis(trifluoroacetate) .....                                                                                         | 6  |
| 2.1.4  | [H <sub>4</sub> <b>11</b> ][CF <sub>3</sub> CO <sub>2</sub> ] <sub>2</sub> ·2CF <sub>3</sub> CO <sub>2</sub> H 5,15-Diphenylporphyrindi-ium bis(trifluoroacetate) bis(trifluoroacetic acid solvate) .....                   | 6  |
| 2.1.5  | H <sub>2</sub> <b>13</b> <sup>1/3</sup> (CH <sub>2</sub> Cl <sub>2</sub> ) 5,15-Bis(3-pentyl)porphyrin 1/3(DCM) .....                                                                                                       | 6  |
| 2.1.6  | [H <sub>4</sub> <b>13</b> ][CF <sub>3</sub> CO <sub>2</sub> ] <sub>2</sub> 5,15-Bis(3-pentyl)porphyrindi-ium bis(trifluoroacetate) .....                                                                                    | 6  |
| 2.1.7  | [H <sub>4</sub> <b>17</b> ][CF <sub>3</sub> CO <sub>2</sub> ] <sub>2</sub> ·2CF <sub>3</sub> CO <sub>2</sub> H 5,15-Bis(4-methoxyphenyl)porphyrindi-ium bis(trifluoroacetate) bis(trifluoroacetic acid solvate) .....       | 7  |
| 2.1.8  | [H <sub>4</sub> <b>18</b> ][ClO <sub>4</sub> ] <sub>2</sub> 5,15-bis(4-bromophenyl)porphyrindi-ium bis(perchlorate) .....                                                                                                   | 7  |
| 2.1.9  | H <sub>2</sub> <b>19</b> 5,15-Diphenyl-10-(thiophen-3-yl)porphyrin .....                                                                                                                                                    | 7  |
| 2.1.10 | [H <sub>4</sub> <b>20</b> ][ClO <sub>4</sub> ] <sub>2</sub> 5-Bromo-10,20-diphenylporphyrindi-ium diperchlorate .....                                                                                                       | 7  |
| 2.1.11 | [H <sub>4</sub> <b>21</b> ][CF <sub>3</sub> CO <sub>2</sub> ] <sub>2</sub> ·2CF <sub>3</sub> CO <sub>2</sub> H 5,15-Dibromo-10,20-bis(4-tolyl)porphyrindi-ium bis(trifluoroacetate) bis(trifluoroacetic acid) solvate ..... | 7  |
| 2.1.12 | [H <sub>4</sub> <b>22</b> ][MeSO <sub>4</sub> ] <sub>2</sub> ·¼H <sub>2</sub> O 5,15-Bis(4-ethynylphenyl)-10,20-diphenylporphyrindi-ium bis(methylsulfate) hemiaqua solvate.....                                            | 7  |
| 2.1.13 | [H <sub>8</sub> <b>23</b> ][ClO <sub>4</sub> ] <sub>4</sub> ·2H <sub>2</sub> O 5,5'-Bis(15-hexyl-10,20-bis(4-methoxyphenyl)porphyrindi-ium) tetrakis(perchlorate) diaqua solvate.....                                       | 7  |
| 2.1.14 | [H <sub>8</sub> <b>24</b> ][CF <sub>3</sub> CO <sub>2</sub> ] <sub>4</sub> ·14H <sub>2</sub> O 5,5'-Bis(10,15,20-triphenylporphyrindi-ium) tetrakis(trifluoroacetate) .....                                                 | 7  |
| 2.2    | Plots of individual crystal structures.....                                                                                                                                                                                 | 9  |
| 2.2.1  | Figure S2.2.1; H <sub>2</sub> <b>11</b> (5,15-diphenylporphyrin) .....                                                                                                                                                      | 9  |
| 2.2.2  | Figure S2.2.2; H <sub>2</sub> <b>11</b> ·CH <sub>2</sub> Cl <sub>2</sub> (5,15-diphenylporphyrin) DCM .....                                                                                                                 | 10 |
| 2.2.3  | Figure S2.2.3; [H <sub>4</sub> <b>11</b> ][CF <sub>3</sub> CO <sub>2</sub> ] <sub>2</sub> 5,15-diphenylporphyrindi-ium bis(trifluoroacetate)....                                                                            | 11 |

|        |                                                                                                                                                                                                                                     |    |
|--------|-------------------------------------------------------------------------------------------------------------------------------------------------------------------------------------------------------------------------------------|----|
| 2.2.4  | Figure S2.2.4; [H <sub>4</sub> 11][CF <sub>3</sub> CO <sub>2</sub> ] <sub>2</sub> ·2CF <sub>3</sub> CO <sub>2</sub> H 5,15-diphenylporphyrindi-ium bis(trifluoroacetate)bis(trifluoroacetic acid solvate) .....                     | 13 |
| 2.2.5  | Figure S2.2.5; H <sub>2</sub> 13· $\frac{1}{3}$ (CH <sub>2</sub> Cl <sub>2</sub> ) 5,15-bis(3-pentyl)porphyrin 1/3(DCM) .....                                                                                                       | 15 |
| 2.2.6  | Figure S2.2.6; [H <sub>4</sub> 13][CF <sub>3</sub> CO <sub>2</sub> ] <sub>2</sub> 5,15-bis(4-(3-pentyl))porphyrindi-ium bis(trifluoroacetate).....                                                                                  | 17 |
| 2.2.7  | Figure S2.2.7; [H <sub>4</sub> 14][CF <sub>3</sub> CO <sub>2</sub> ] <sub>2</sub> 5,10,15-triphenylporphyrindi-ium bis(trifluoroacetate) 19                                                                                         |    |
| 2.2.8  | Figure S2.2.8; H <sub>2</sub> 15 5,15-bis(4-butoxyphenyl)porphyrin .....                                                                                                                                                            | 21 |
| 2.2.9  | Figure S2.2.9; [H <sub>4</sub> 17][CF <sub>3</sub> CO <sub>2</sub> ] <sub>2</sub> ·2CF <sub>3</sub> CO <sub>2</sub> H 5,15-bis(4-methoxyphenyl)porphyrindi-ium bis(trifluoroacetate) bis(trifluoroacetic acid solvate) .....        | 22 |
| 2.2.10 | Figure S2.2.10; [H <sub>4</sub> 18][ClO <sub>4</sub> ] <sub>2</sub> 5,15-bis(4-bromophenyl)porphyrindi-ium bis(perchlorate).....                                                                                                    | 24 |
| 2.2.11 | Figure S2.2.11; [H <sub>4</sub> 18][CF <sub>3</sub> CO <sub>2</sub> ] <sub>2</sub> ·2CF <sub>3</sub> CO <sub>2</sub> H 5,15-bis(4-bromophenyl)porphyrindi-ium bis(trifluoroacetate) bis(trifluoroacetic acid solvate) .....         | 26 |
| 2.2.12 | Figure S2.2.12; [H <sub>4</sub> 19][CF <sub>3</sub> CO <sub>2</sub> ] <sub>2</sub> ·2CF <sub>3</sub> CO <sub>2</sub> H 5,15-bis(4-methylthiophenyl)porphyrindi-ium bis(trifluoroacetate) bis(trifluoroacetic acid) solvate .....    | 28 |
| 2.2.13 | Figure S2.2.13; H <sub>2</sub> 16 5,15-diphenyl-10-(thiophen-3-yl)porphyrin .....                                                                                                                                                   | 30 |
| 2.2.14 | Figure S2.2.14; [H <sub>4</sub> 20][ClO <sub>4</sub> ] <sub>2</sub> 5-bromo-10,20-diphenylporphyrindi-ium diperchlorate32                                                                                                           |    |
| 2.2.15 | Figure S2.2.15; [H <sub>4</sub> 21][CF <sub>3</sub> CO <sub>2</sub> ] <sub>2</sub> ·2CF <sub>3</sub> CO <sub>2</sub> H 5,15-dibromo-10,20-bis(4-tolyl)porphyrindi-ium bis(trifluoroacetate) bis(trifluoroacetic acid) solvate ..... | 34 |
| 2.2.16 | Figure S2.2.16; [H <sub>4</sub> 22][MeSO <sub>4</sub> ] <sub>2</sub> · $\frac{1}{4}$ H <sub>2</sub> O 5,15-bis(4-ethynylphenyl)-10,20-diphenylporphyrindi-ium bis(methylsulfate) hemiaqua solvate .....                             | 36 |
| 2.2.17 | Figure S2.2.17; [H <sub>8</sub> 23][ClO <sub>4</sub> ] <sub>4</sub> ·2H <sub>2</sub> O 5,5'-Bis(15-hexyl-10,20-bis(4-methoxyphenyl)porphyrindi-ium) tetrakis(perchlorate) diaqua solvate.....                                       | 38 |
| 2.2.18 | Figure S2.2.18; [H <sub>8</sub> 24][CF <sub>3</sub> CO <sub>2</sub> ] <sub>4</sub> ·14H <sub>2</sub> O 5,5'-bis(10,15,20-triphenylporphyrindi-ium) tetrakis(trifluoroacetate) .....                                                 | 41 |
| 2.3    | Normal-coordinate Structural Decomposition (NSD) .....                                                                                                                                                                              | 44 |
| 2.3.1  | NSD result generated from H <sub>2</sub> 11 (5,15-diphenylporphyrin) .....                                                                                                                                                          | 45 |
| 2.3.2  | NSD result generated from H <sub>2</sub> 11·CH <sub>2</sub> Cl <sub>2</sub> (5,15-diphenylporphyrin DCM) .....                                                                                                                      | 46 |
| 2.3.3  | NSD result generated from [H <sub>4</sub> 11][CF <sub>3</sub> CO <sub>2</sub> ] <sub>2</sub> (5,15-diphenylporphyrindi-ium bis(trifluoroacetate)) .....                                                                             | 47 |
| 2.3.4  | NSD result generated from [H <sub>4</sub> 11][CF <sub>3</sub> CO <sub>2</sub> ] <sub>2</sub> ·2CF <sub>3</sub> CO <sub>2</sub> H (5,15-diphenylporphyrindi-ium bis(trifluoroacetate) bis(trifluoroacetic acid solvate)) .....       | 48 |
| 2.3.5  | NSD result generated from H <sub>2</sub> 13· $\frac{1}{3}$ (CH <sub>2</sub> Cl <sub>2</sub> ) (5,15-bis(3-pentyl)porphyrin 1/3(DCM)) .....                                                                                          | 49 |
| 2.3.6  | NSD result generated from [H <sub>4</sub> 13][CF <sub>3</sub> CO <sub>2</sub> ] <sub>2</sub> (5,15-bis(3-pentyl)porphyrindi-ium bis(trifluoroacetate)) .....                                                                        | 50 |
| 2.3.7  | NSD result generated from [H <sub>4</sub> 14][CF <sub>3</sub> CO <sub>2</sub> ] <sub>2</sub> (5,15-triphenylporphyrindi-ium bis(trifluoroacetate)) .....                                                                            | 51 |

|        |                                                                                                                                                                                                                                                       |    |
|--------|-------------------------------------------------------------------------------------------------------------------------------------------------------------------------------------------------------------------------------------------------------|----|
| 2.3.8  | NSD result generated from H <sub>2</sub> <b>15</b> (5,15-bis(4-butoxyphenyl)porphyrin)                                                                                                                                                                | 52 |
| 2.3.9  | NSD result generated from [H <sub>4</sub> <b>17</b> ][CF <sub>3</sub> CO <sub>2</sub> ] <sub>2</sub> ·2CF <sub>3</sub> CO <sub>2</sub> H (5,15-bis(4-methoxyphenyl)porphyrindi-ium bis(trifluoroacetate) bis(trifluoroacetic acid solvate))           | 53 |
| 2.3.10 | NSD result generated from [H <sub>4</sub> <b>18</b> ][ClO <sub>4</sub> ] <sub>2</sub> (5,15-bis(4-bromophenyl)porphyrindi-ium bis(perchlorate)) (HE)                                                                                                  | 54 |
| 2.3.11 | NSD result generated from [H <sub>4</sub> <b>18</b> ][ClO <sub>4</sub> ] <sub>2</sub> (5,15-bis(4-bromophenyl)porphyrindi-ium bis(perchlorate)) (MS)                                                                                                  | 55 |
| 2.3.12 | NSD result generated from [H <sub>4</sub> <b>18</b> ][CF <sub>3</sub> CO <sub>2</sub> ] <sub>2</sub> ·2CF <sub>3</sub> CO <sub>2</sub> H (5,15-bis(4-methylthiophenyl)porphyrindi-ium bis(trifluoroacetate) bis(trifluoroacetic acid) solvate) (HE)   | 56 |
| 2.3.13 | NSD result generated from [H <sub>4</sub> <b>18</b> ][CF <sub>3</sub> CO <sub>2</sub> ] <sub>2</sub> ·2CF <sub>3</sub> CO <sub>2</sub> H (5,15-bis(4-methylthiophenyl)porphyrindi-ium bis(trifluoroacetate) bis(trifluoroacetic acid) solvate) (MS)   | 57 |
| 2.3.14 | NSD result generated from H <sub>2</sub> <b>19</b> (5,15-diphenyl-10-(thiophen-3-yl)porphyrin)                                                                                                                                                        | 58 |
| 2.3.15 | NSD result generated from [H <sub>4</sub> <b>20</b> ][ClO <sub>4</sub> ] <sub>2</sub> (5-bromo-10,20-diphenylporphyrindi-ium diperchlorate)                                                                                                           | 59 |
| 2.3.16 | NSD result generated from file [H <sub>4</sub> <b>21</b> ][CF <sub>3</sub> CO <sub>2</sub> ] <sub>2</sub> ·2CF <sub>3</sub> CO <sub>2</sub> H (5,15-dibromo-10,20-bis(4-tolyl)porphyrindi-ium bis(trifluoroacetate)bis(trifluoroacetic acid) solvate) | 60 |
| 2.3.17 | NSD result generated from [H <sub>8</sub> <b>23</b> ][ClO <sub>4</sub> ] <sub>4</sub> ·2H <sub>2</sub> O (5,5'-Bis(15-hexyl-10,20-bis(4-methoxyphenyl)porphyrindi-ium) tetrakis(perchlorate) diaqua solvate)                                          | 61 |
| 2.3.18 | NSD result generated from [H <sub>4</sub> <b>22</b> ][MeSO <sub>4</sub> ] <sub>2</sub> ·¼H <sub>2</sub> O (5,15-bis(4-ethynylphenyl)-10,20-diphenylporphyrindi-ium bis(methylsulfate) hemiaqua solvate)                                               | 62 |
| 2.3.19 | NSD result generated from [H <sub>4</sub> <b>18</b> ][CF <sub>3</sub> CO <sub>2</sub> ] <sub>2</sub> ·2CF <sub>3</sub> CO <sub>2</sub> H (5,15-bis(4-bromophenyl)porphyrindi-ium bis(trifluoroacetate) bis(trifluoroacetic acid) solvate)             | 63 |
| 2.3.20 | NSD result generated from [H <sub>8</sub> <b>24</b> ][CF <sub>3</sub> CO <sub>2</sub> ] <sub>4</sub> ·14H <sub>2</sub> O (5,5'-bis(10,15,20-triphenylporphyrindi-ium) tetrakis(trifluoroacetate) aqua solvate)                                        | 64 |
| 2.3.21 | NSD result generated from CCDC entry ODEFOS (H <sub>2</sub> <b>11</b> (monoclinic), 5,15-diphenylporphyrin)                                                                                                                                           | 65 |
| 2.3.22 | NSD result generated from CCDC entry MOSQEQ (H <sub>2</sub> <b>14</b> 5,10,15-triphenylporphyrin)                                                                                                                                                     | 66 |
| S3.    | Supplemental Images and tables                                                                                                                                                                                                                        | 67 |

## S1. Tables of structure codes referenced in the statistical analyses

Crystal structures are available from <https://ccdc.cam.ac.uk/structures>

### 1.1 Table S1.1; Porphyrin diacid CCDC structure codes

| Index | CCDC Refcode | Index | CCDC Refcode |
|-------|--------------|-------|--------------|
| 1     | ANIHIQ       | 41    | PEZXAW       |
| 2     | ARORUV       | 42    | QARCAQ       |
| 3     | ASUNAD       | 43    | QEZKIP       |
| 4     | BASJUA       | 44    | QOLPAK       |
| 5     | BEJDIG       | 45    | QOSYUT       |
| 6     | CETPEX       | 46    | QURRAY       |
| 7     | FARBEI       | 47    | RALVAC       |
| 8     | FATQUP       | 48    | RARQEJ       |
| 9     | FIMRAV       | 49    | RATXUI       |
| 10    | FOKZUC       | 50    | REVROZ       |
| 11    | GALROC       | 51    | RUHQAM       |
| 12    | GEFLOU       | 52    | RUHQEQ       |
| 13    | GOBSOF       | 53    | RUHQIU       |
| 14    | GOBYIF       | 54    | SEPVIT       |
| 15    | GUZMUJ       | 55    | TIQLAH       |
| 16    | KEVDAT       | 56    | TIQLEL       |
| 17    | KIBLIQ       | 57    | TIQLIP       |
| 18    | KIBMAJ       | 58    | TPPFEC       |
| 19    | KIBMEN       | 59    | TPYPRC10     |
| 20    | KIBPEQ       | 60    | VACSIC       |
| 21    | KIBPEQ01     | 61    | VOGZAT       |
| 22    | LEXSIQ       | 62    | WINXEW       |
| 23    | LEYFOK       | 63    | WIXZAF       |
| 24    | LEYFUQ       | 64    | WUKBOT       |
| 25    | LEYHIG       | 65    | XAQKOR       |
| 26    | LEYPEK       | 66    | XARVIW       |
| 27    | LEYQAH       | 67    | XEDFOD       |
| 28    | LOGMOJ       | 68    | XEDFUJ       |
| 29    | LOLPOR       | 69    | XEDGAQ       |
| 30    | MANHOZ       | 70    | XEDGEU       |
| 31    | MANHUF       | 71    | XEKDEZ       |
| 32    | MANJAN       | 72    | YEVJAN       |
| 33    | MIGNEW       | 73    | YEVKAL       |
| 34    | NICPAR       | 74    | YEVKIT       |
| 35    | NICPEV       | 75    | YEVKIT01     |
| 36    | NUFTEO       | 76    | YEVKOZ       |
| 37    | NUHKUW       | 77    | YEVKUF       |
| 38    | OCAQAN       | 78    | WIXDIT       |
| 39    | OCIQEY       |       |              |
| 40    | PACXEY       |       |              |

1.2 Table S1.2. 5,15-disubstituted and 5,10,15-trisubstituted porphyrin free base structure codes

| Index                     | CCDC Refcode | 5,15-(R)=                                                                    | B <sub>2g</sub> (1)  parameter |
|---------------------------|--------------|------------------------------------------------------------------------------|--------------------------------|
| Free bases                |              |                                                                              |                                |
| 1                         | AFIFOM       | 4-OBu-C <sub>6</sub> H <sub>4</sub>                                          | 0.32                           |
| 2                         | AQIQOI       | 4-(CO <sub>2</sub> Me)-C <sub>6</sub> H <sub>4</sub>                         | 0.43                           |
| 3                         | BASDUX       | 4-OOct-C <sub>6</sub> H <sub>4</sub>                                         | 0.32                           |
| 4                         | CUYCOQ       | 2-NH <sub>2</sub> -C <sub>6</sub> H <sub>4</sub>                             | 0.27                           |
| 5                         | EDEVER       | 4-CO <sub>2</sub> (H, Ca)-C <sub>6</sub> H <sub>4</sub>                      | 0.29                           |
| 6                         | EDEVUH       | 4-CO <sub>2</sub> (H, Mg)-C <sub>6</sub> H <sub>4</sub>                      | 0.25                           |
| 7                         | IMAXAV       | 2-MeOMe-C <sub>6</sub> H <sub>4</sub>                                        | 0.26                           |
| 8                         | ISECAM       | Mesityl                                                                      | 0.25                           |
| 9                         | ISECAM01     | Mesityl                                                                      | 0.23                           |
| 10                        | KAPCIO       | 4-OOc-C <sub>6</sub> H <sub>4</sub>                                          | 0.26                           |
| 11                        | KIPWOX       | 4-O <i>i</i> -Pr-C <sub>6</sub> H <sub>4</sub>                               | 0.23                           |
| 12                        | KIPWUD       | 4-O <i>i</i> -Pr-C <sub>6</sub> H <sub>4</sub>                               | 0.23                           |
| 13                        | NENHAS       | Strapped                                                                     | 0.27                           |
| 14                        | ODEFOS       | Ph                                                                           | 0.42                           |
| 15                        | ODEFUU       | Ph (+DCM)                                                                    | 0.35                           |
| 16                        | PAMZIO       | 4-Tolyl/4-OBu-C <sub>6</sub> H <sub>4</sub>                                  | 0.29                           |
| 17                        | QOSQOF       | 4-(O-Hx-6-SAc)-C <sub>6</sub> H <sub>4</sub>                                 | 0.26                           |
| 18                        | SIVTEX       | 2,6-di(OHx)-C <sub>6</sub> H <sub>3</sub>                                    | 0.29                           |
| 19                        | UGACOW       | Terphenyl oxoborate dimer                                                    | 0.30                           |
| 20                        | ZAQSUF       | Strapped                                                                     | 0.17                           |
| 21                        | ZAQTAM       | Strapped                                                                     | 0.14                           |
| 22                        | ZAQTEQ       | Strapped                                                                     | 0.17                           |
| 23                        | GOBBAB       | Py                                                                           | 0.31                           |
| 24                        | GOBBEF       | PyCH <sub>3</sub> <sup>+</sup> (OTs <sup>-</sup> ) <sub>2</sub>              | 0.37                           |
| 25                        | REVQIT       | 2-Thiophene                                                                  | 0.48                           |
| 26                        | SAZDUU       | Et                                                                           | 0.38                           |
| 27                        | SAZFAC       | <i>n</i> Bu                                                                  | 0.36                           |
| 5,15- Diacid              |              |                                                                              |                                |
| 1                         | MANJAN       | 3,5-di(MeO)-C <sub>6</sub> H <sub>3</sub>                                    | 0.11                           |
| 5,10,15-triaryl freebases |              |                                                                              |                                |
| 1                         | BEDPIM       | 2-Iodo-5,10,15-triphenylporphyrin                                            | 0.13                           |
| 2                         | BEDPOS       | 2-bromo-5,10,15-triphenylporphyrin                                           | 0.15                           |
| 3                         | EFALAZ       | 5,10,15-tri(3,5-di-tert-butylphenyl)-2,18-di((O-hexyl)-3-acrylate)-porphyrin | 0.23                           |
| 4                         | EFALIH       | 5,10,15-tri(3,5-di-tert-butylphenyl)-2,18-di(octan-3-one) - porphyrin        | 0.26                           |
| 5                         | MOSQEQ       | 5,10,15-triphenylporphyrin                                                   | 0.21                           |
| 6                         | OYIHUB02     | (2-bis(trimethylsilyloxy)methylsilylanyl)-5,10,15-triphenylporphyrin         | 0.14                           |
| 7                         | QOQGOS       | 2,3,7,8,12,13,17,18-octaethyl-5,10,15-triphenylporphyrin                     | 0.13                           |
| 8                         | UQUQEE       | 5,10,15-tri(3,5-di-tert-butylphenyl)porphyrin                                | 0.10                           |
| 9                         | QIYSEZ       | 5,15-bis(mesityl)-10-(xanthene derivative)-porphyrin                         | 0.02                           |
| 10                        | QIYSOJ       | 5,15-bis(mesityl)-10-(xanthene derivative)- porphyrin                        | 0.08                           |

## S2. Single Crystal X-ray diffraction studies

The general procedure for X-ray analysis is outlined in the methods section of the main paper.

### 2.1 Details of disorder and deviation from general crystallographic procedure

#### 2.1.1 General disorder modelling

Disorder was modelled as described in Section 3.2.1 of the main text.

Reflections were omitted when, on the advice of CheckCIF, the values presented were indicative of stark disagreement with the model, and a missed modelling in the data reduction step or an outlier.

EADP were used when two atoms of the same assignment were observed to have overlapping ellipsoids and shared a site (i.e. non-bimodal assigned electron density from the e- density map). EXYZ were also used in these cases to prevent some overfit of strong high-angle data, a consequence of free refinement of Fourier-type data.

SIMU were used for refined disorder over a two- or three-site model to constrain over-modelling. SUMP was used in three-component modelling to restrict all components to a sum occupancy of 1.

H-atoms were constrained (AFIX n3) on C, and free on N, unless otherwise indicated. Weak DFIX commands (sigma ca. 0.1 angstroms) were used to define visually identified hydrogen bonding with solvent. O-H...O H-atom distances between trifluoroacetic acid and trifluoroacetate anions, assumed to have 'symmetric hydrogen-bond' character due to the similarity between the donor and acceptor, were often required to be fixed using a DFIX command. Water solvent was modelled in each case as constrained with DFIX commands for O-H and H-H distances, with hydrogen bonds defined as described for other solvent.

Specific computer instructions used are available in the `_shelx_res_file` section of the CIF supplementary information.

#### 2.1.2 $H_211 \cdot CH_2Cl_2$ 5,15-Diphenylporphyrin DCM N21-H21 and N23-H23 were constrained with DFIX

#### 2.1.3 $[H_411][CF_3CO_2]_2$ 5,15-Diphenylporphyrindi-ium bis(trifluoroacetate) N21-H21 was constrained with DFIX

#### 2.1.4 $[H_411][CF_3CO_2]_2 \cdot 2CF_3CO_2H$ 5,15-Diphenylporphyrindi-ium bis(trifluoroacetate) bis(trifluoroacetic acid solvate)

Several low angle reflections (1 0 0, 1 1 0, 3 0 0, 1 1 1) were omitted due to presumptive interference with the beamstop. Two of the eight N-H bonds in two non-symmetrically equivalent porphyrins in the asymmetric unit were constrained with DFIX. A trifluoroacetic acid molecule was modelled as disordered over two orientations (O1B -F7B (77%) and O1C-F7C (23%)) and this was constrained with SIMU.

#### 2.1.5 $H_213 \cdot \frac{1}{3}(CH_2Cl_2)$ 5,15-Bis(3-pentyl)porphyrin 1/3(DCM)

DCM solvent was constrained with SIMU and DFIX to idealised C-Cl distances. This solvent was disordered about a six-fold center of symmetry.

#### 2.1.6 $[H_413][CF_3CO_2]_2$ 5,15-Bis(3-pentyl)porphyrindi-ium bis(trifluoroacetate)

The pentyl group at the 5- position was modelled as disordered over two positions (C51-C56 and C61-C66, 0.86:0.14 with hydrogens) as was the trifluoromethyl component of the trifluoroacetate anion (C2A,F1A-F3A and C2B,F1B-F3B, 0.89:0.11). Reflection -3 1 2 was omitted due to stark disagreement with the model.

2.1.7 [H<sub>4</sub>17][CF<sub>3</sub>CO<sub>2</sub>]<sub>2</sub>·2CF<sub>3</sub>CO<sub>2</sub>H 5,15-Bis(4-methoxyphenyl)porphyrindi-ium bis(trifluoroacetate) bis(trifluoroacetic acid solvate)

5 reflections were omitted due to interference with the beamstop, and a further 19 due to negative intensities from overzealous background correction. O-H...O H-atom distances between trifluoroacetic acid and trifluoroacetate anions were DFIXed.

2.1.8 [H<sub>4</sub>18][ClO<sub>4</sub>]<sub>2</sub> 5,15-bis(4-bromophenyl)porphyrindi-ium bis(perchlorate)

Perchlorate was modelled as disordered over two orientation sharing approximate Cl position. The perchlorate molecules (Cl1A & O1A-O4A, 20%, Cl1B & O1B-O4B, 80%) were constrained to a sum occupancy of 1 and to similar thermal ellipsoids using a SIMU command.

2.1.9 H<sub>2</sub>19 5,15-Diphenyl-10-(thiophen-3-yl)porphyrin

The thiophene at the 10-position of the porphyrin ring was modelled as disordered over two orientations (C101-C102-S103-C104-C105, 62% and C101-C106-S107-C108-C109, 38%), representing approx. 180° rotation of the thiophene around the thiophene-porphyrin bond. SADI commands were used to constrain the C-S, C-C, and C=C bonds in the thiophene to equivalent values. Reflections 2θ > 135° were omitted.

2.1.10 [H<sub>4</sub>20][ClO<sub>4</sub>]<sub>2</sub> 5-Bromo-10,20-diphenylporphyrindi-ium diperchlorate

N24-H24A was constrained with DFIX. The hydrogen (H5 and H15) and bromine atoms (Br1 and Br2 respectively) were constrained to a sum occupancy of 1 at each site, however the two bromine atoms had a sum occupancy which exceeded 1, due to an impurity of 5,15-dibromo-10,20-diphenylporphyrindi-ium diperchlorate accounting for 19.1% of the molecules within the crystal.

2.1.11 [H<sub>4</sub>21][CF<sub>3</sub>CO<sub>2</sub>]<sub>2</sub>·2CF<sub>3</sub>CO<sub>2</sub>H 5,15-Dibromo-10,20-bis(4-tolyl)porphyrindi-ium bis(trifluoroacetate) bis(trifluoroacetic acid) solvate

N22-H22 was constrained with DFIX

2.1.12 [H<sub>4</sub>22][MeSO<sub>4</sub>]<sub>2</sub>·½H<sub>2</sub>O 5,15-Bis(4-ethynylphenyl)-10,20-diphenylporphyrindi-ium bis(methylsulfate) hemiaqua solvate

Both of the methylsulfate anions in the asymmetric unit were modelled as disordered over two orientations (S2A,O5A-O8A and C50A, 52%, S2B,O5B-O8B and C50B, 48%) and (S1A, O1A-O4A and C49A, 92%, S1B, O1B-O4B and C49B, 8%); SADI, SIMU (between bonded atoms) and EADP (equivalent atoms) commands were used to constrain these two orientations to hold equal thermal parameters and bond distances in each case.

2.1.13 [H<sub>8</sub>23][ClO<sub>4</sub>]<sub>4</sub>·2H<sub>2</sub>O 5,5'-Bis(15-hexyl-10,20-bis(4-methoxyphenyl)porphyrindi-ium) tetrakis(perchlorate) diaqua solvate

The alkyl chain at the 15 position of the porphyrin ring was modelled as disordered over 3 orientations, sharing the positions C151 and C152 (100%), and disordered C153-C156 (63%) C163-C166 (26%) and C173-C176 (11%) constrained to a total occupancy of 1.0000(1) with a SUMP command. SIMU and DFIX commands were used to constrain the alkyl chain to a sensible geometry. Three reflections (1 1 0, 4 0 2, 4 2 1) were omitted because of disagreement with the model.

2.1.14 [H<sub>8</sub>24][CF<sub>3</sub>CO<sub>2</sub>]<sub>4</sub>·14H<sub>2</sub>O 5,5'-Bis(10,15,20-triphenylporphyrindi-ium) tetrakis(trifluoroacetate) Squeeze routine in PLATON was used to account for electron density from disordered water molecules. Porphyrin core hydrogen-bonding interactions (D-H...A, D = {N21,N22,N23,N24}) were fixed from both D-H and H...A in all cases due to instability of the H-atom position to refinement. This was considered preferable to fixed positional refinement, given the importance of hydrogen bonding patterns to this paper. 8 atoms {C5 C6 N22 C2B O1W O2W C12 C201 C154} had to be constrained as approximately isotropic due to lying near sites of crystallographic Fourier ripples from

the origin, which caused collapse of the ellipsoid. The trifluoromethyl component of a trifluoroacetate anion was modelled as disordered over two positions (F5A-F7A and C2A (73%) / F5B-F7B and C2B (27%)) with SIMU to constrain thermal parameters. Solvent water was modelled as two rotating rigid molecules of fractional occupancy (35% and 31%); including disordered water molecules accounted for by SQUEEZE a total of 56 water molecules were identified in the unit cell ( $Z = 4$ ). 6 reflections were omitted due to disagreement with the model.



## 2.2 Plots of individual crystal structures

### 2.2.1 Figure S2.2.1; H<sub>2</sub>11 (5,15-diphenylporphyrin)

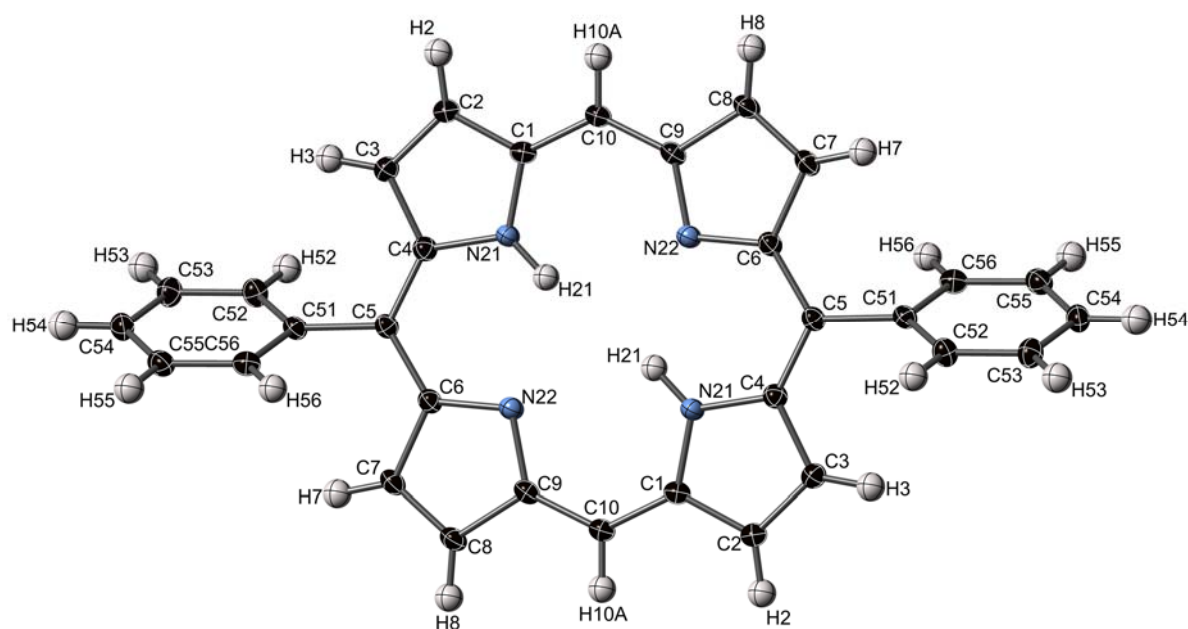

- a) A labelled plot of the atoms within the asymmetric unit of compound H<sub>2</sub>11. Thermal ellipsoids are shown at 50% probability level.

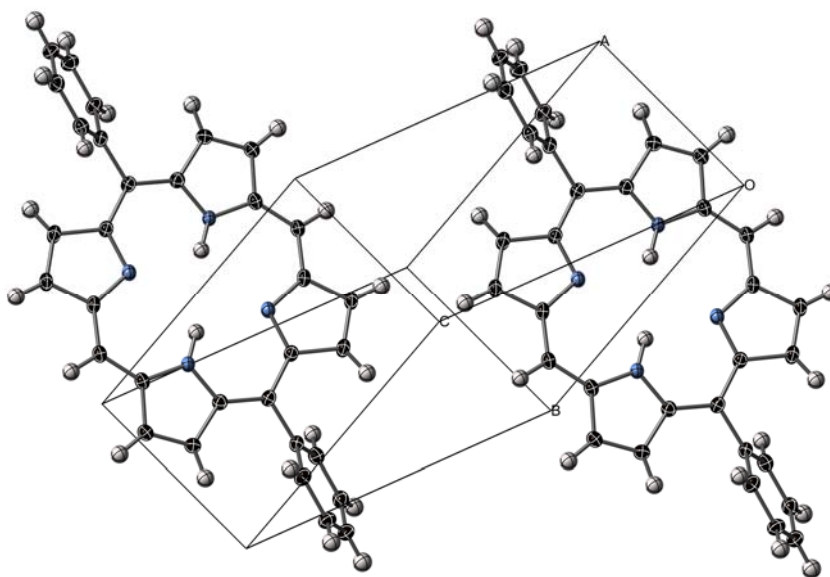

- b) A plot of the molecules which comprise the unit cell of the crystal structure of compound H<sub>2</sub>11 (Z = 4). Thermal ellipsoids are shown at 50% probability level.

2.2.2 Figure S2.2.2;  $\text{H}_2\mathbf{11}\cdot\text{CH}_2\text{Cl}_2$  (5,15-diphenylporphyrin) DCM

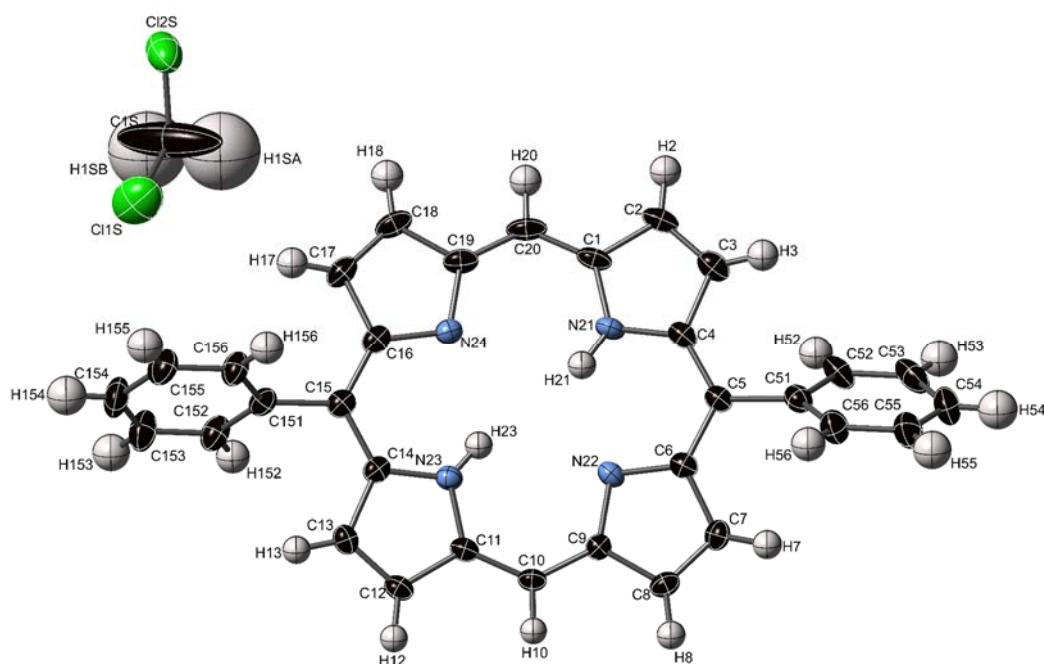

- c) A labelled plot of the atoms within the asymmetric unit of compound  $\text{H}_2\mathbf{11}\cdot\text{CH}_2\text{Cl}_2$ . Thermal ellipsoids are shown at 50% probability level.

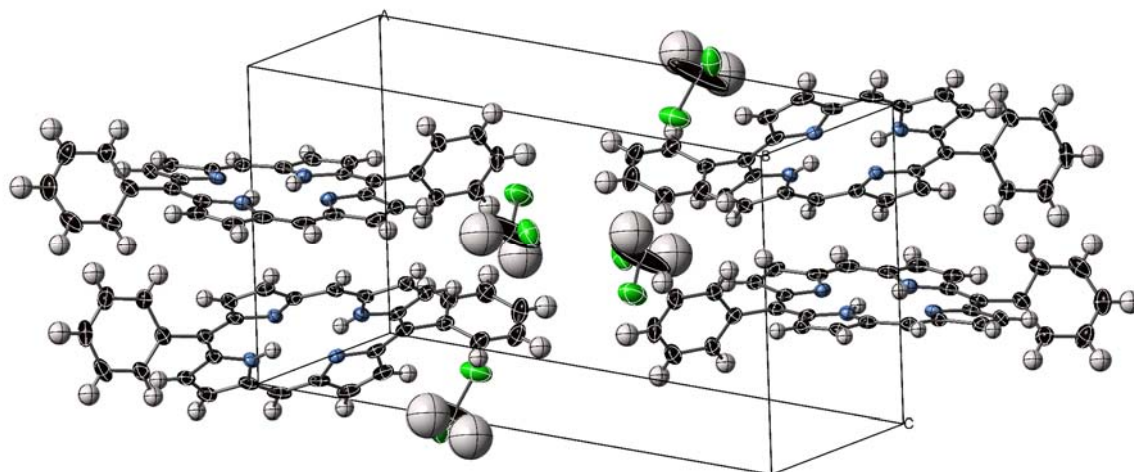

- d) A plot of the molecules which comprise the unit cell of the crystal structure of compound  $\text{H}_2\mathbf{11}\cdot\text{CH}_2\text{Cl}_2$  ( $Z = 4$ ). Thermal ellipsoids are shown at 50% probability level.

2.2.3 Figure S2.2.3;  $[H_4\mathbf{11}][CF_3CO_2]_2$  5,15-diphenylporphyrindi-ium bis(trifluoroacetate)

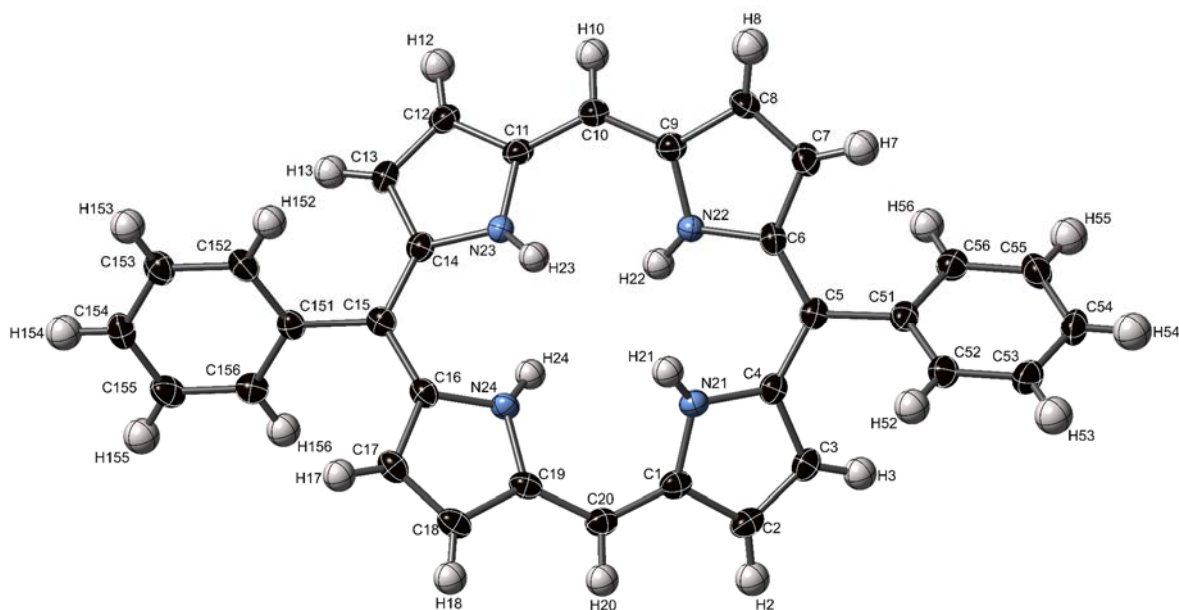

- a) A labelled plot of the atoms within the asymmetric unit of compound  $[H_4\mathbf{11}][CF_3CO_2]_2$ . Thermal ellipsoids are shown at 50% probability level; trifluoroacetate anions have been omitted.

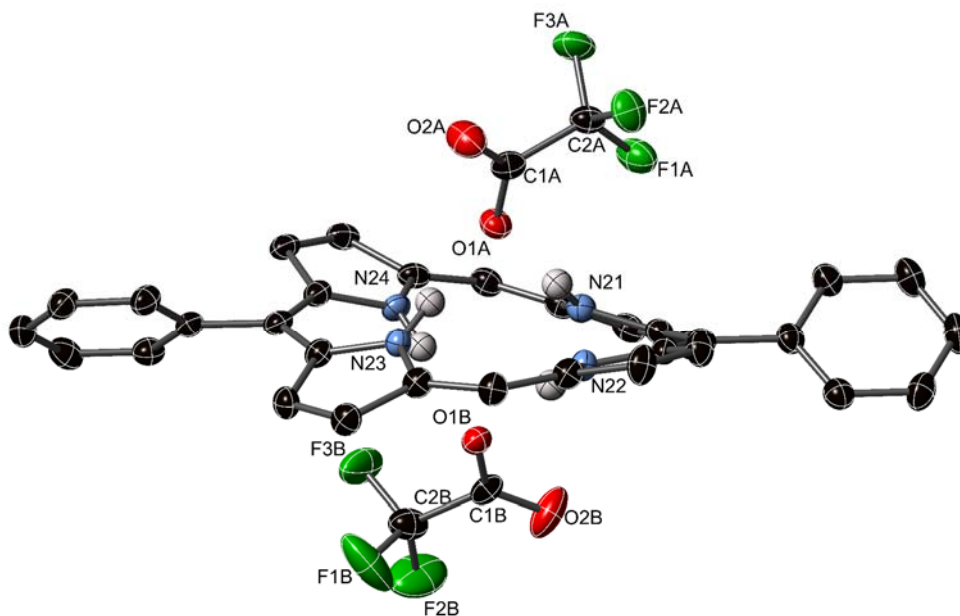

- b) A labelled plot of the anions within the asymmetric unit of compound  $[H_4\mathbf{11}][CF_3CO_2]_2$  and the interaction with the porphyrin core. Thermal ellipsoids are shown at 50% probability level.

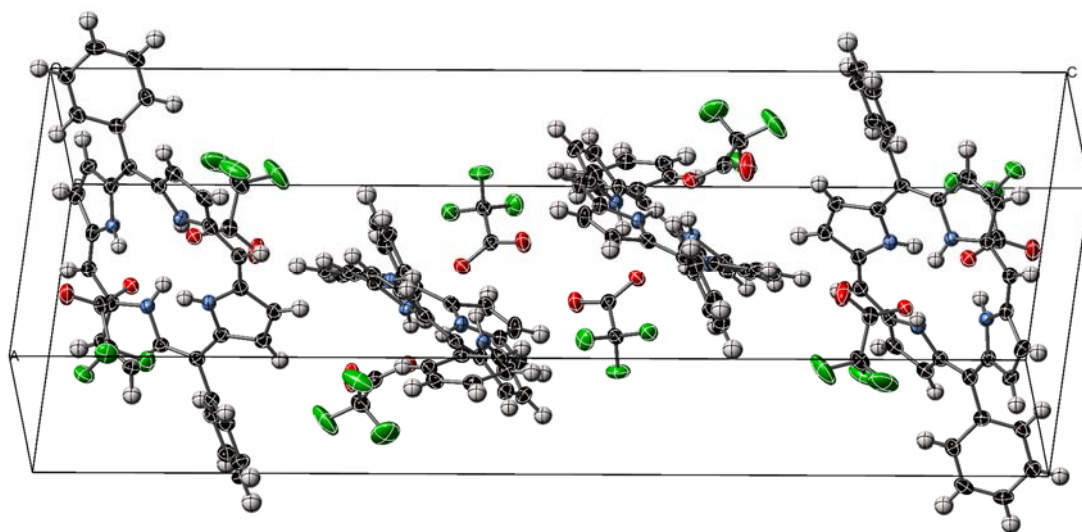

- c) The molecules within the unit cell of compound  $[\text{H}_4\mathbf{11}][\text{CF}_3\text{CO}_2]_2$  ( $Z = 4$ ). Thermal ellipsoids are shown at 50% probability level.

2.2.4 Figure S2.2.4;  $[H_4\mathbf{11}][CF_3CO_2]_2 \cdot 2CF_3CO_2H$  5,15-diphenylporphyrindi-ium bis(trifluoroacetate)bis(trifluoroacetic acid solvate)

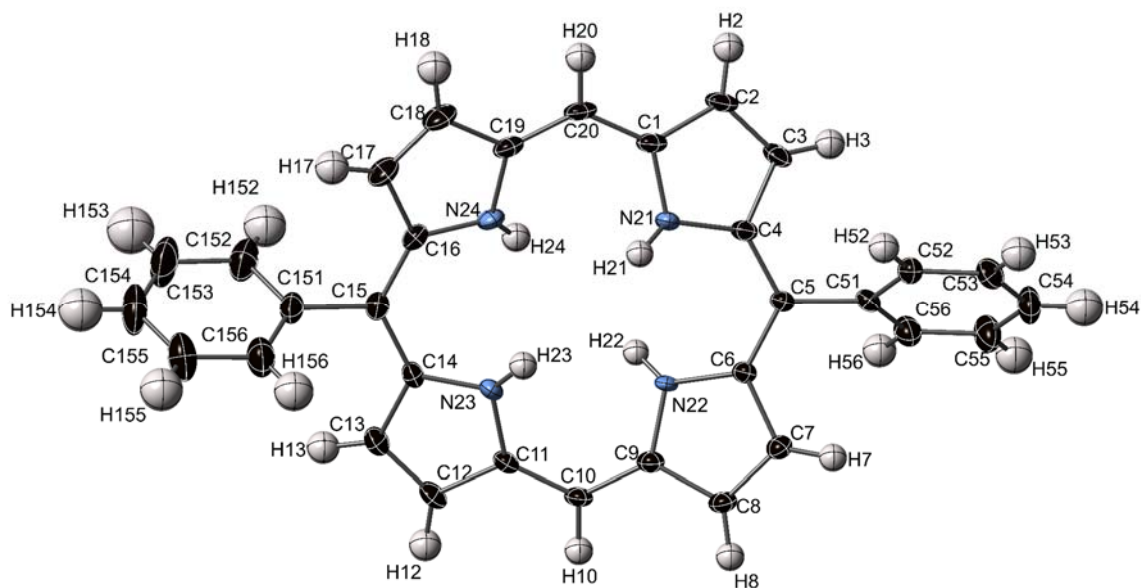

- a) A labelled plot of the atoms within the asymmetric unit of compound  $[H_4\mathbf{11}][CF_3CO_2]_2 \cdot 2CF_3CO_2H$ . Thermal ellipsoids are shown at 50% probability level; trifluoroacetate anions have been omitted.

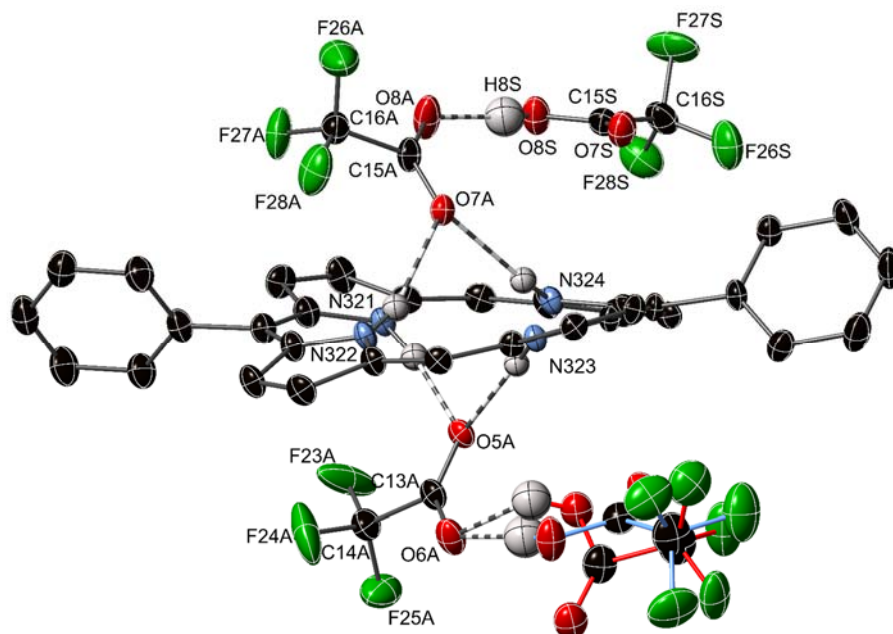

- b) Labelled plot of trifluoroacetate anions and trifluoroacetic acid solvate molecules within the asymmetric unit of Compound  $[H_4\mathbf{11}][CF_3CO_2]_2 \cdot 2CF_3CO_2H$  and the interaction with the porphyrin core. Thermal ellipsoids are shown at 50% probability level.

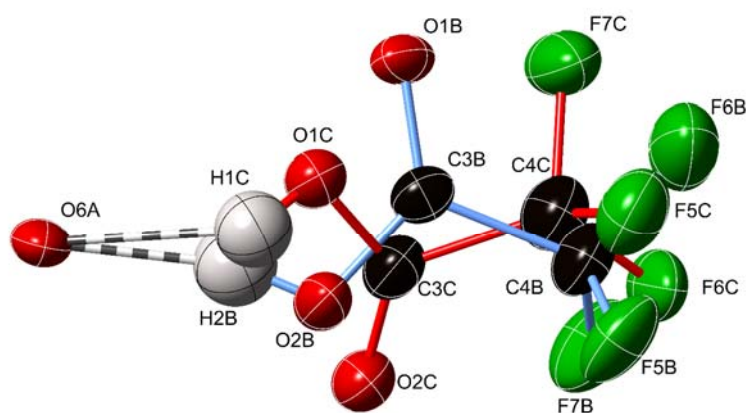

- c) A labelled plot of the disordered trifluoroacetic acid solvate component of compound  $[H_4\mathbf{11}][CF_3CO_2]_2 \cdot 2CF_3CO_2H$  and the interaction with the porphyrin core. Thermal ellipsoids are shown at 50% probability level. This trifluoroacetic acid molecule was modelled as disordered over two orientations (O1B -F7B (77%) with blue bonds and O1C-F7C (23%) with red bonds). Thermal ellipsoids were constrained with SIMU commands as indicated in Section 1.1.4.

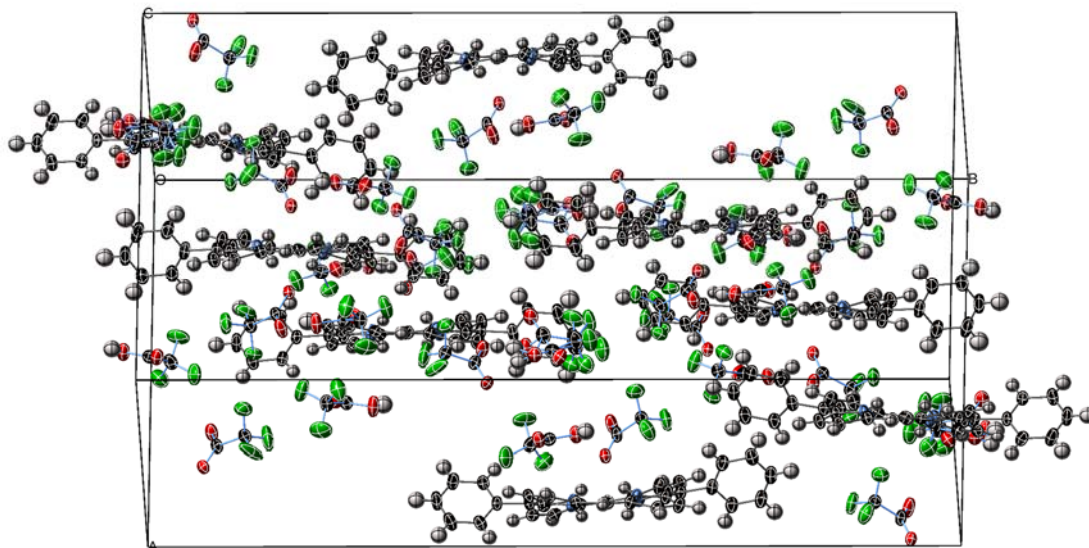

- d) The molecules within the unit cell of compound  $[H_4\mathbf{11}][CF_3CO_2]_2 \cdot 2CF_3CO_2H$  ( $Z = 8$ ). Thermal ellipsoids are shown at 50% probability level. Trifluoroacetate anions and trifluoroacetic acid molecules are highlighted with blue bonds.

2.2.5 Figure S2.2.5;  $\text{H}_2\mathbf{13}\cdot\frac{1}{3}(\text{CH}_2\text{Cl}_2)$  5,15-bis(3-pentyl)porphyrin 1/3(DCM)

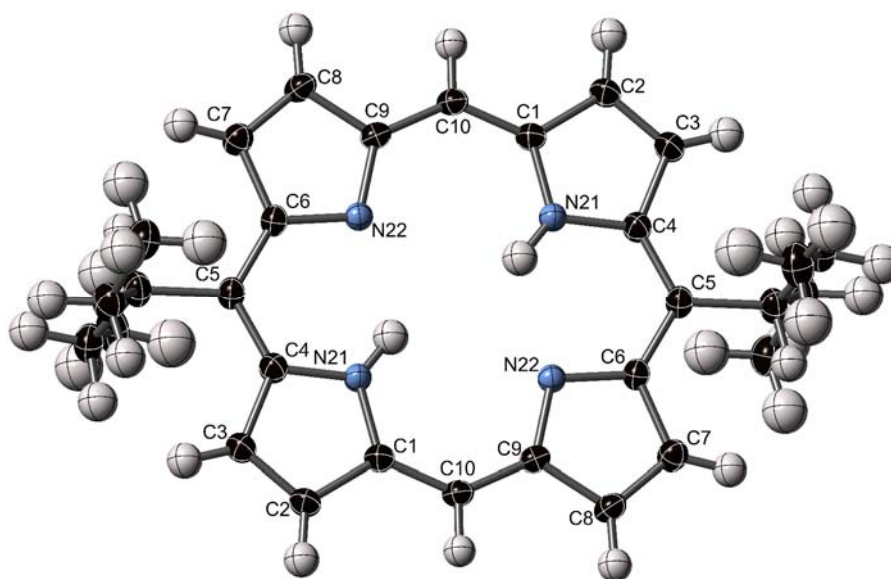

- a) A labelled plot of the atoms within the porphyrin core of compound  $\text{H}_2\mathbf{13}\cdot\frac{1}{3}(\text{CH}_2\text{Cl}_2)$ . Thermal ellipsoids are shown at 50% probability level; DCM solvate has been omitted. This molecule lies on a centre of inversion symmetry and therefore includes two asymmetric units.

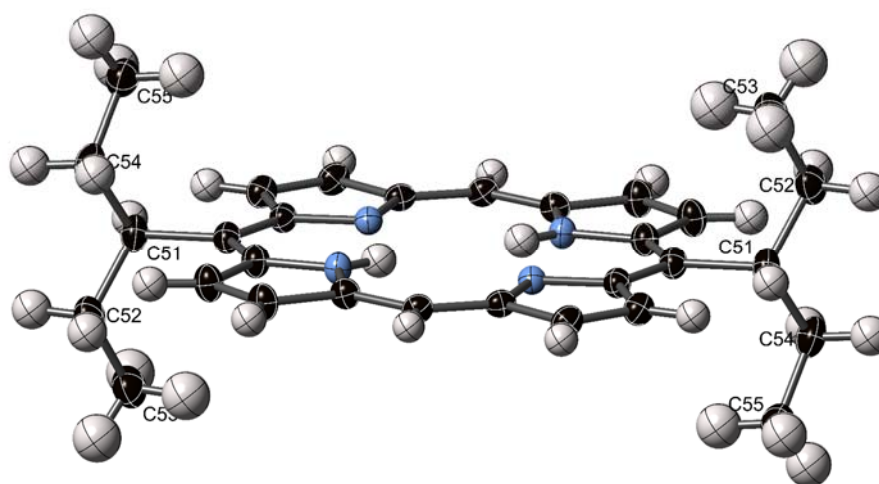

- b) Labelled plot of the side chains of the porphyrin within the molecular unit of compound  $\text{H}_2\mathbf{13}\cdot\frac{1}{3}(\text{CH}_2\text{Cl}_2)$ . Thermal ellipsoids are shown at 50% probability level.

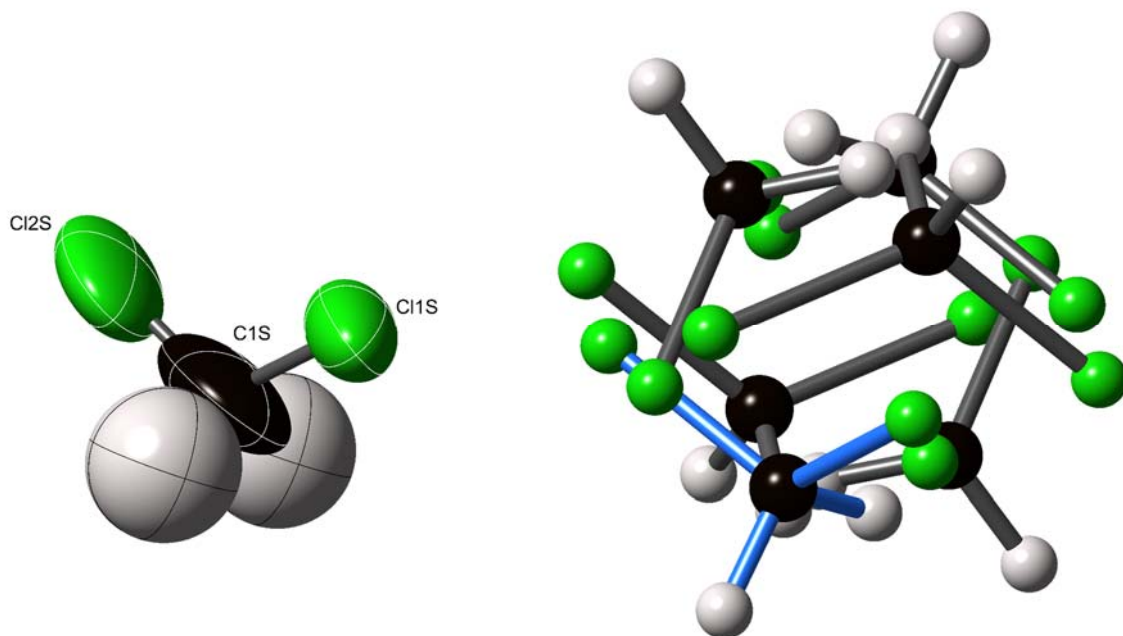

- c) Left - A labelled plot of the dichloromethane solvate (thermal ellipsoids 50%) and Right – the six molecules which are disordered over the solvate site, with a single DCM molecule highlighted in blue and atoms represented as spheres. Sum occupancy of all DCM molecules at the site is constrained to 1; SIMU was used to constrain the thermal ellipsoids of the highly disordered molecule.

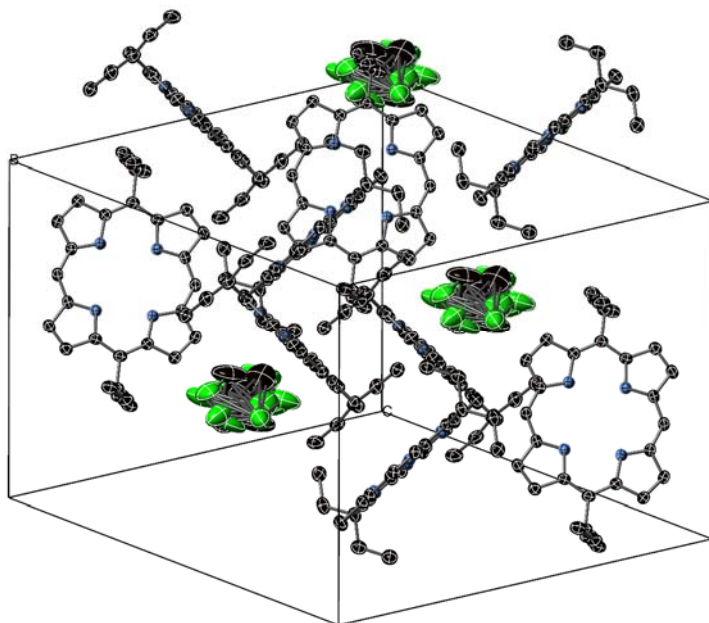

- d) The molecules within the unit cell of compound  $\text{H}_2\mathbf{13}\cdot\frac{1}{3}(\text{CH}_2\text{Cl}_2)$  ( $Z = 9$ ). Thermal ellipsoids are shown at 50% probability level. Hydrogen atoms have been omitted.



2.2.6 Figure S2.2.6;  $[H_4\mathbf{13}][CF_3CO_2]_2$  5,15-bis(4-(3-pentyl))porphyrindi-ium bis(trifluoroacetate)

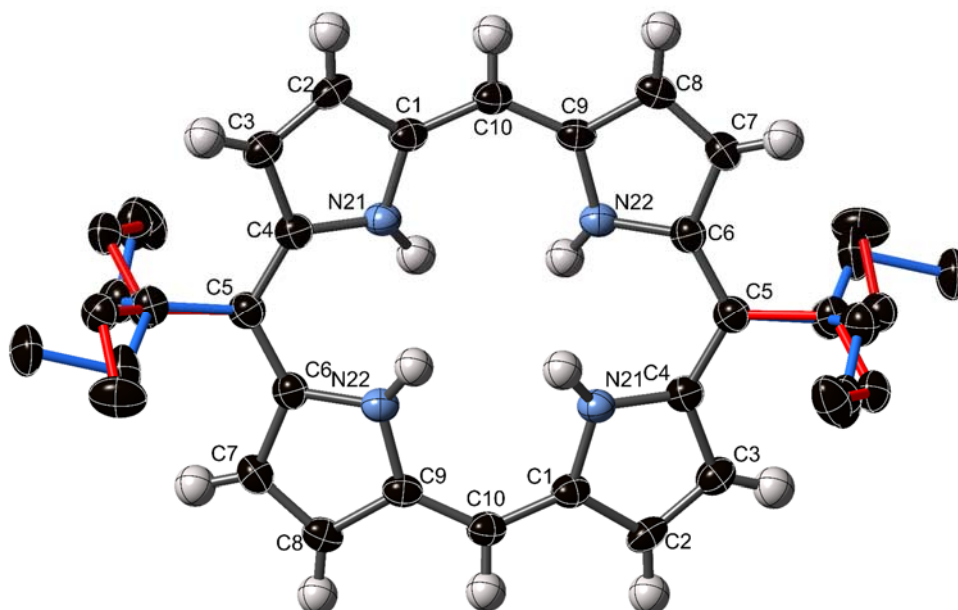

- a) A labelled plot of the atoms within the porphyrin core of Compound  $[H_4\mathbf{13}][CF_3CO_2]_2$ . Thermal ellipsoids are shown at 50% probability level. This molecule lies on a centre of inversion symmetry and therefore includes two asymmetric units.

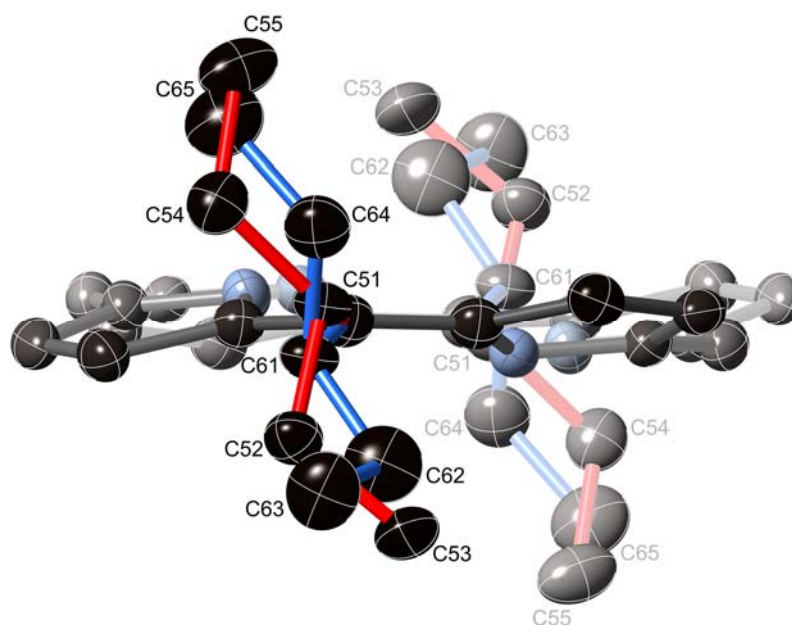

- b) Labelled plot of the side chains of the porphyrin within the molecular unit of compound  $[H_4\mathbf{13}][CF_3CO_2]_2$ . Thermal ellipsoids are shown at 50% probability level.

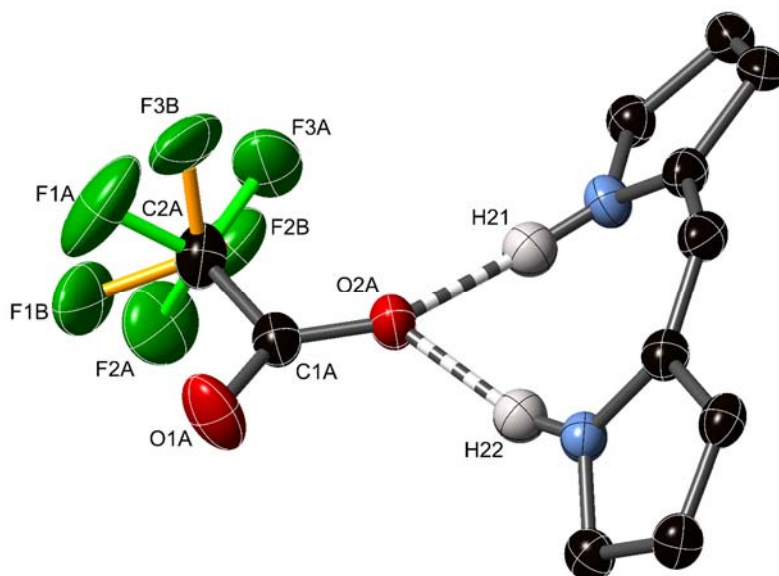

- c) Left - A labelled plot of the disordered trifluoroacetate anion (thermal ellipsoids 50%) and the interaction with two adjacent pyrrole units of the porphyrin core; the three F atoms are disordered over two orientations.

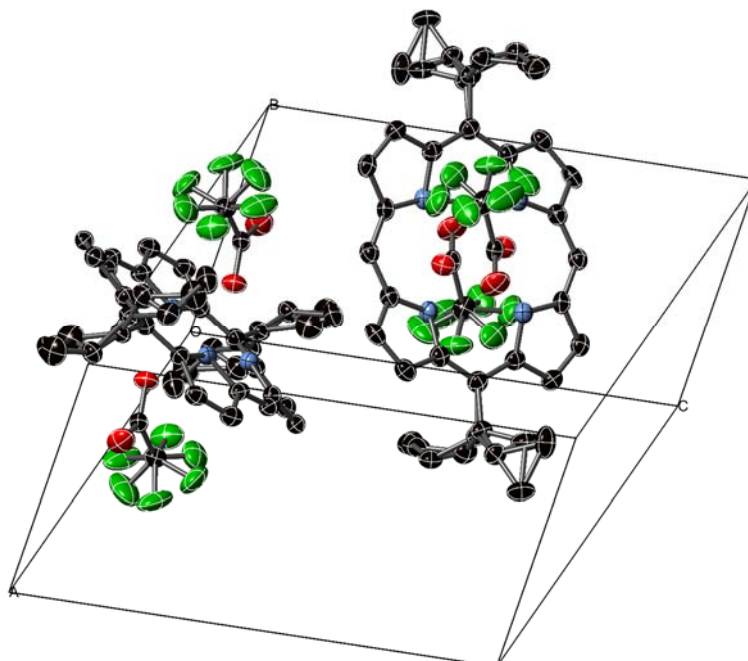

- d) The molecules within the unit cell of compound  $[H_4\mathbf{13}][CF_3CO_2]_2$  ( $Z = 2$ ). Thermal ellipsoids are shown at 50% probability level. Hydrogen atoms have been omitted.

2.2.7 Figure S2.2.7;  $[H_4\mathbf{14}][CF_3CO_2]_2$  5,10,15-triphenylporphyrindi-ium bis(trifluoroacetate)

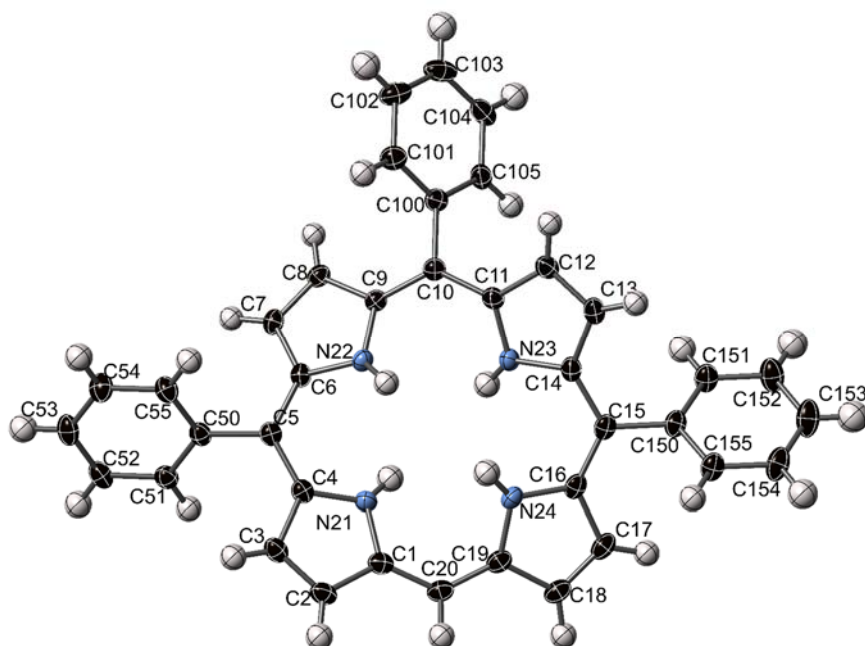

- A labelled plot of the atoms within the porphyrin component of compound  $[H_4\mathbf{14}][CF_3CO_2]_2$ , 5,10,15-triphenylporphyrindi-ium bis(trifluoroacetate). Thermal ellipsoids are shown at 50% probability level; trifluoroacetate anions have been omitted.
- Labelled plot of the hydrogen-bonded trifluoroacetate anions coordinated to the porphyrin

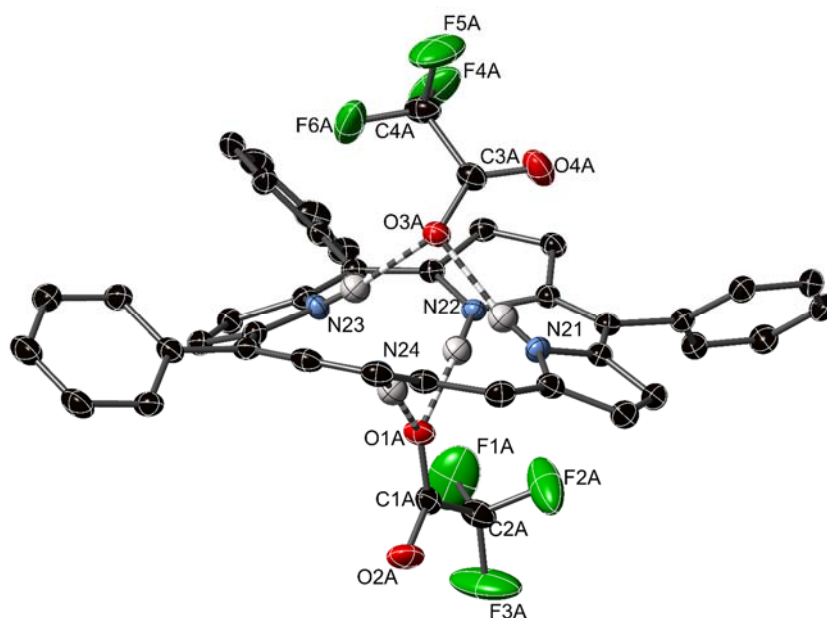

core within the molecular unit of compound  $[H_4\mathbf{14}][CF_3CO_2]_2$ . Thermal ellipsoids are shown at 50% probability level.

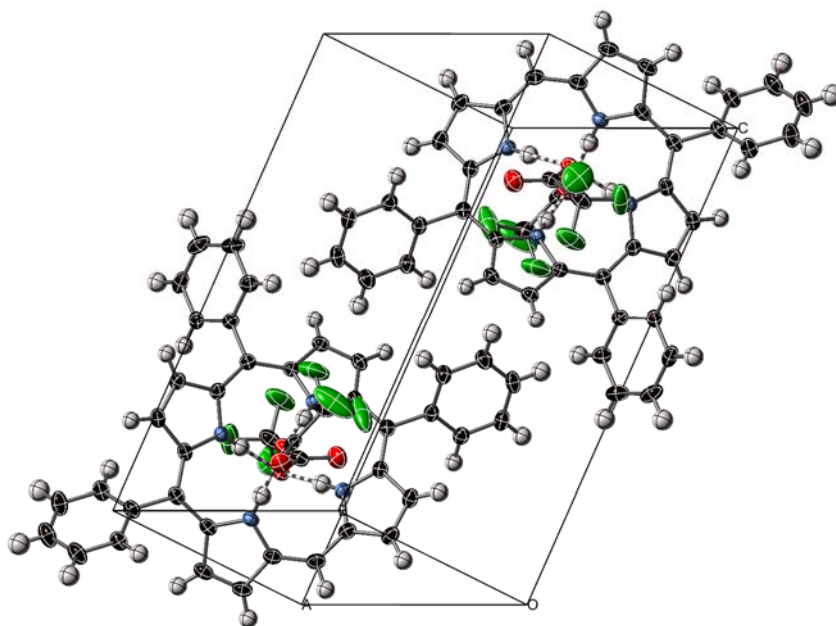

- c) The molecules within the unit cell of compound  $[\text{H}_4\mathbf{14}][\text{CF}_3\text{CO}_2]_2$  ( $Z = 2$ ). Thermal ellipsoids are shown at 50% probability level.

2.2.8 Figure S2.2.8; H<sub>2</sub>15 5,15-bis(4-butoxyphenyl)porphyrin

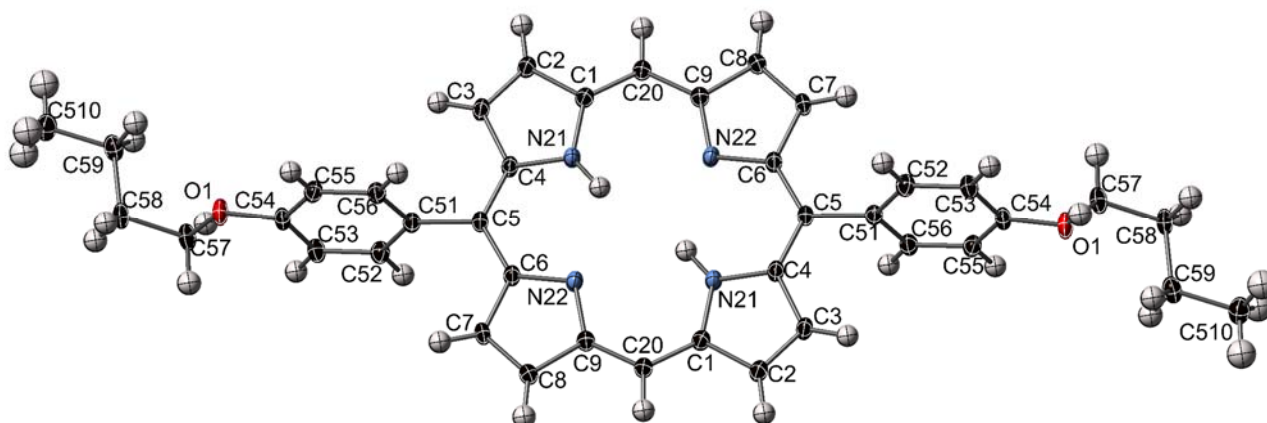

- a) A labelled plot of the atoms within the asymmetric unit of compound H<sub>2</sub>15, 5,15-bis(4-butoxyphenyl)porphyrin. Thermal ellipsoids are shown at 50% probability level; DCM solvate has been omitted. This molecule lies on a centre of inversion symmetry and therefore includes two asymmetric units.

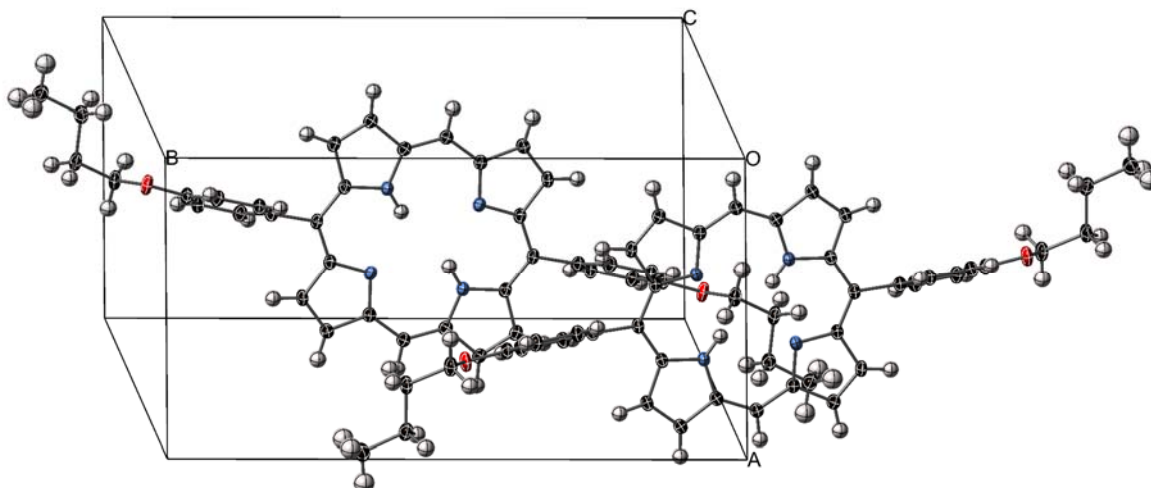

- b) The molecules within the unit cell of compound H<sub>2</sub>15 (Z = 2). Thermal ellipsoids are shown at 50% probability level.

2.2.9 Figure S2.2.9;  $[H_4\mathbf{17}][CF_3CO_2]_2 \cdot 2CF_3CO_2H$  5,15-bis(4-methoxyphenyl)porphyrindi-ium bis(trifluoroacetate) bis(trifluoroacetic acid solvate)

a) A labelled plot of the atoms within the porphyrin component of the asymmetric unit of

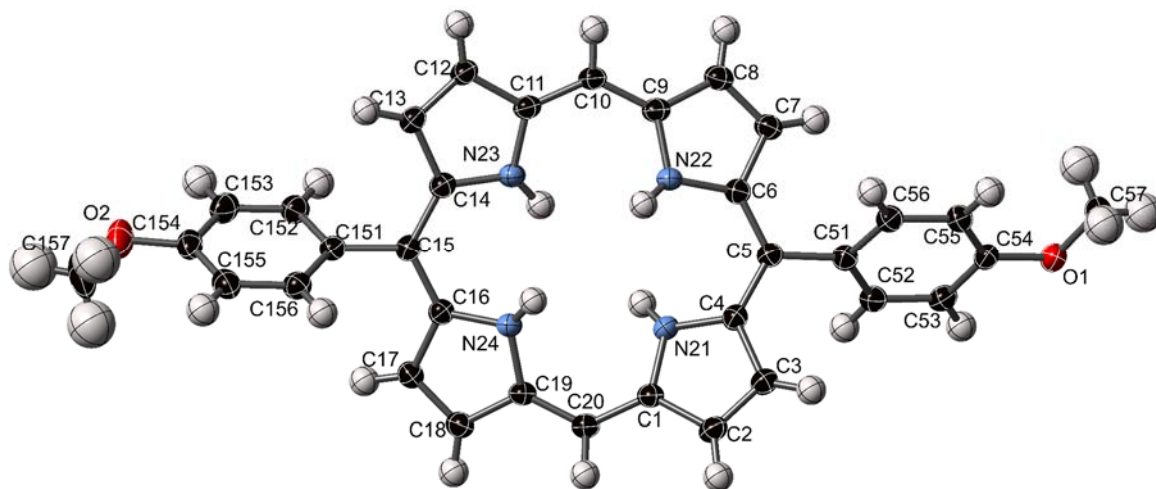

Compound  $[H_4\mathbf{17}][CF_3CO_2]_2 \cdot 2CF_3CO_2H$ , 5,15-bis(4-methoxyphenyl)porphyrindi-ium bis(trifluoroacetate) bis(trifluoroacetic acid solvate). Thermal ellipsoids are shown at 50% probability level.

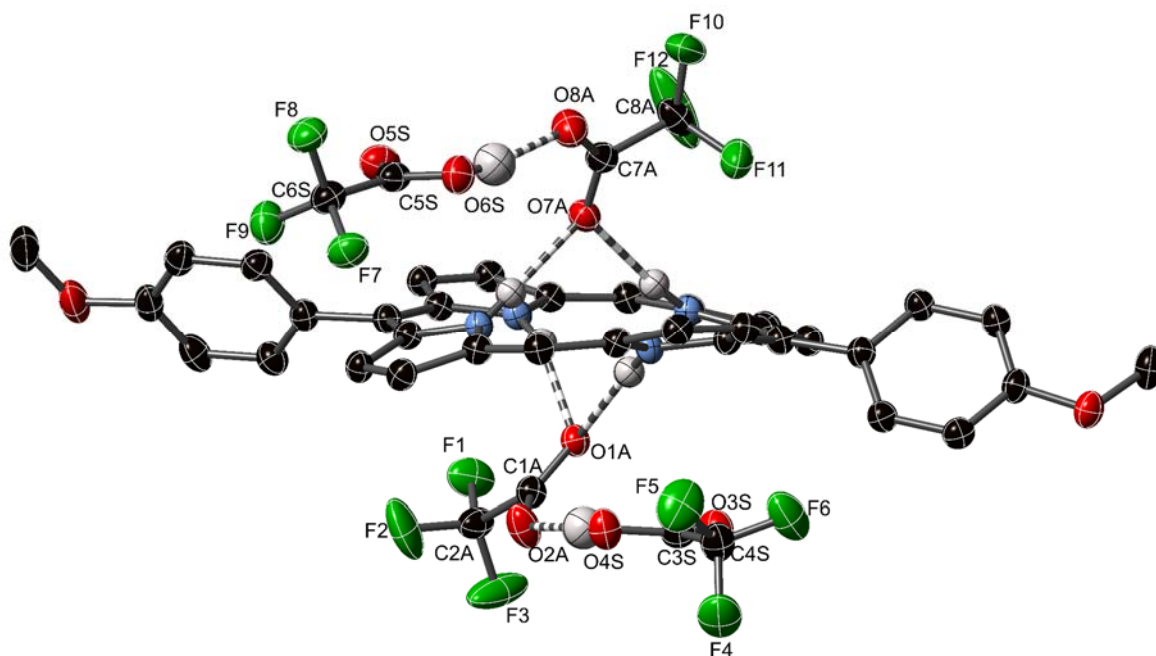

b) Labelled plot of trifluoroacetate anions and trifluoroacetic acid solvate molecules within the asymmetric unit of compound  $[H_4\mathbf{17}][CF_3CO_2]_2 \cdot 2CF_3CO_2H$  and the interaction with the porphyrin core. Thermal ellipsoids are shown at 50% probability level.

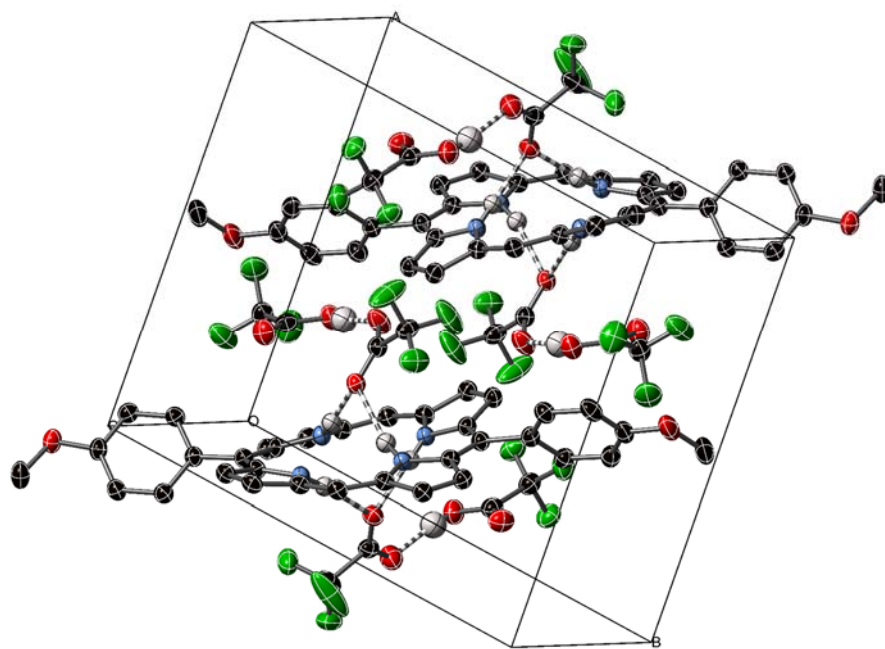

- c) The molecules within the unit cell of Compound  $[\text{H}_{417}][\text{CF}_3\text{CO}_2]_2 \cdot 2\text{CF}_3\text{CO}_2\text{H}$  ( $Z = 2$ ). Thermal ellipsoids are shown at 50% probability level. C-bound hydrogen atoms have been omitted.

2.2.10 Figure S2.2.10;  $[H_4\mathbf{18}][ClO_4]_2$  5,15-bis(4-bromophenyl)porphyrindi-ium bis(perchlorate)

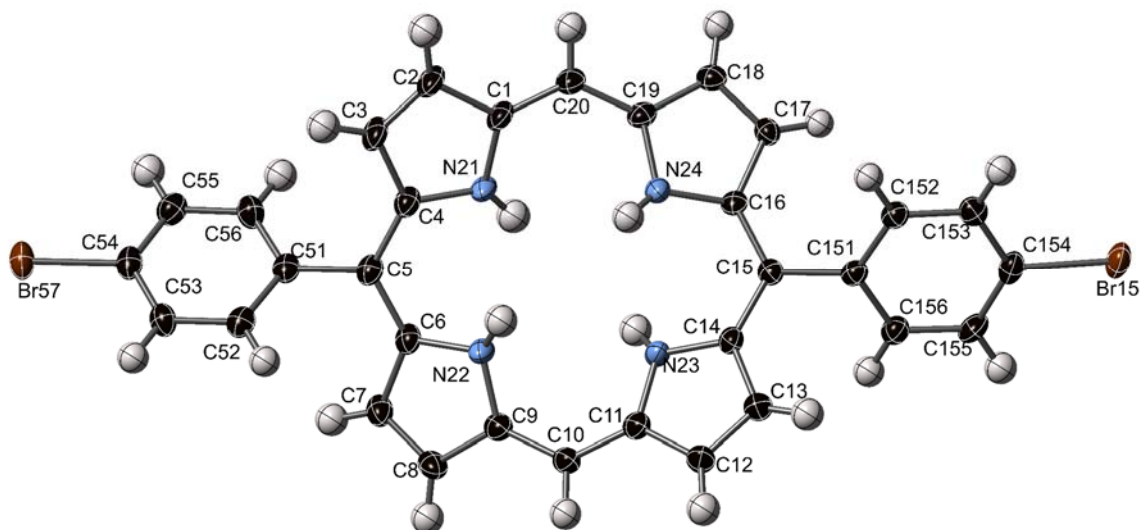

- a) A labelled plot of the atoms within the porphyrin component of the asymmetric unit of Compound  $[H_4\mathbf{18}][ClO_4]_2$ , 5,15-bis(4-bromophenyl)porphyrindi-ium bis(perchlorate). Thermal ellipsoids are shown at 50% probability level.

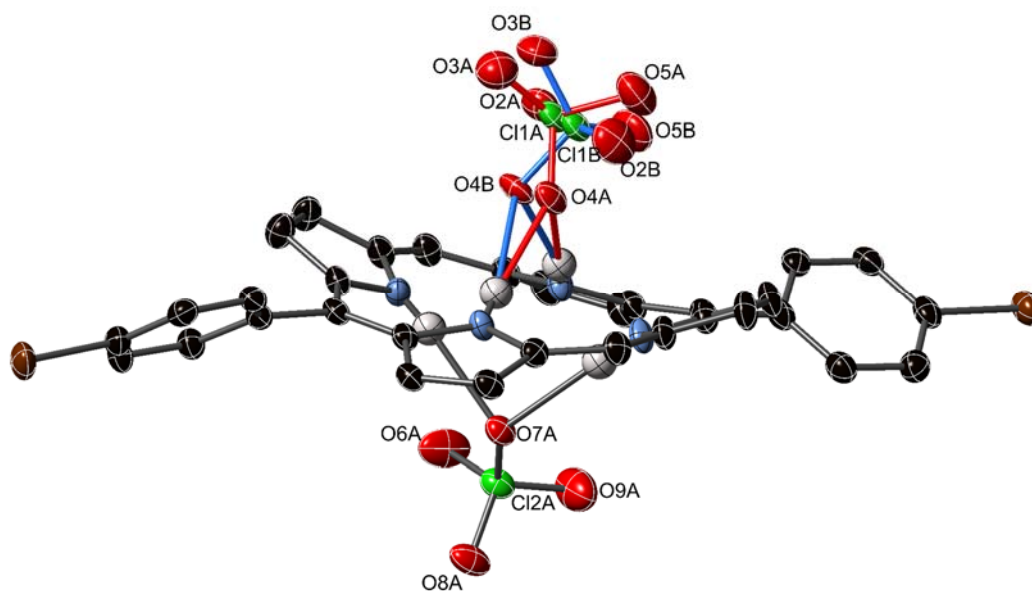

- b) Labelled plot of perchlorate anions within the asymmetric unit of compound  $[H_4\mathbf{18}][ClO_4]_2$  and the interaction with the porphyrin core. Thermal ellipsoids are shown at 50% probability level. H-atoms not involved in hydrogen bonding have been omitted, The molecule Cl1/O1-O4 is disordered over two orientations (A and B) as indicated by red bonds (A, 20%) and blue bonds (B, 80%)



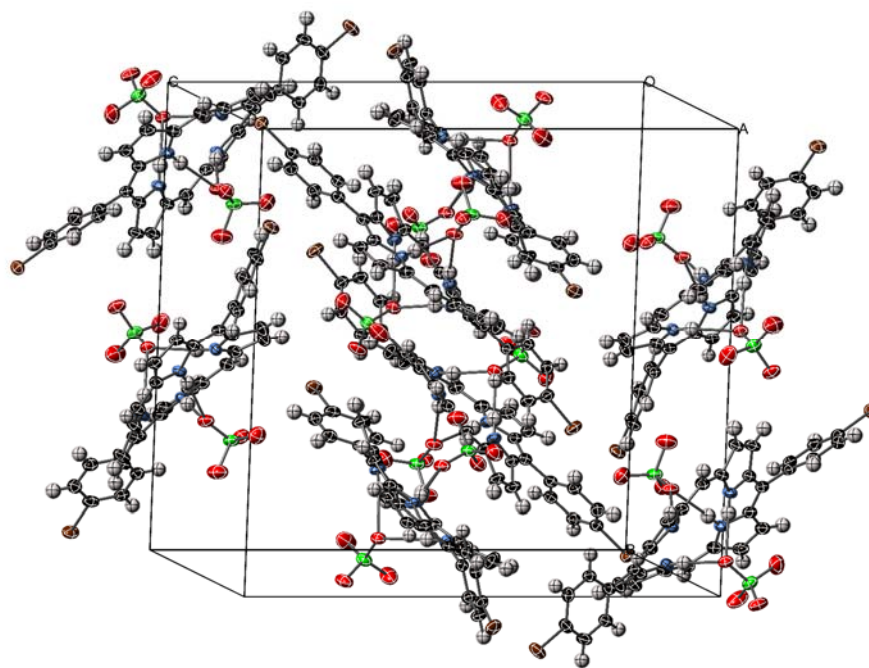

- c) The molecules within the unit cell of compound  $[\text{H}_4\mathbf{18}][\text{ClO}_4]_2$  ( $Z = 8$ ). Thermal ellipsoids are shown at 50% probability level.

2.2.11 Figure S2.2.11;  $[H_4\mathbf{18}][CF_3CO_2]_2 \cdot 2CF_3CO_2H$  5,15-bis(4-bromophenyl)porphyrindi-ium bis(trifluoroacetate) bis(trifluoroacetic acid solvate)

a) A labelled plot of the atoms within the porphyrin component of the asymmetric unit of

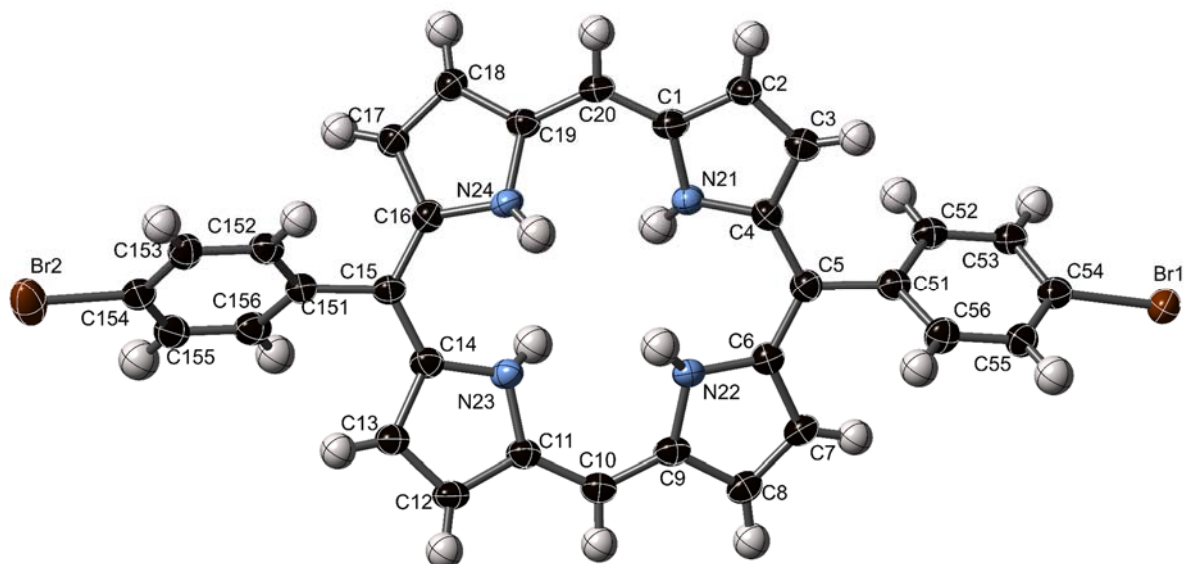

Compound  $[H_4\mathbf{18}][CF_3CO_2]_2 \cdot 2CF_3CO_2H$ , 5,15-bis(4-bromophenyl)porphyrindi-ium bis(trifluoroacetate) bis(trifluoroacetic acid solvate). Thermal ellipsoids are shown at 50%

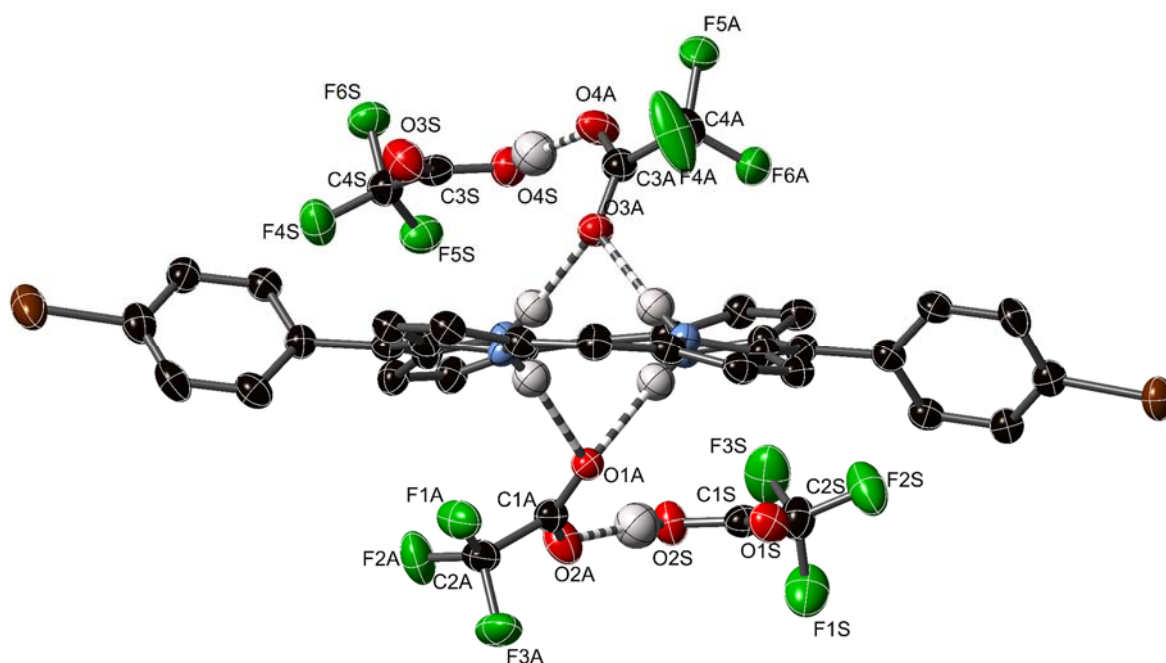

probability level.

b) Labelled plot of trifluoroacetate anions and trifluoroacetic acid solvate within the asymmetric unit of compound  $[H_4\mathbf{18}][CF_3CO_2]_2 \cdot 2CF_3CO_2H$ , and the interaction with the porphyrin core. Thermal ellipsoids are shown at 50% probability level. H-atoms not involved in hydrogen bonding have been omitted.

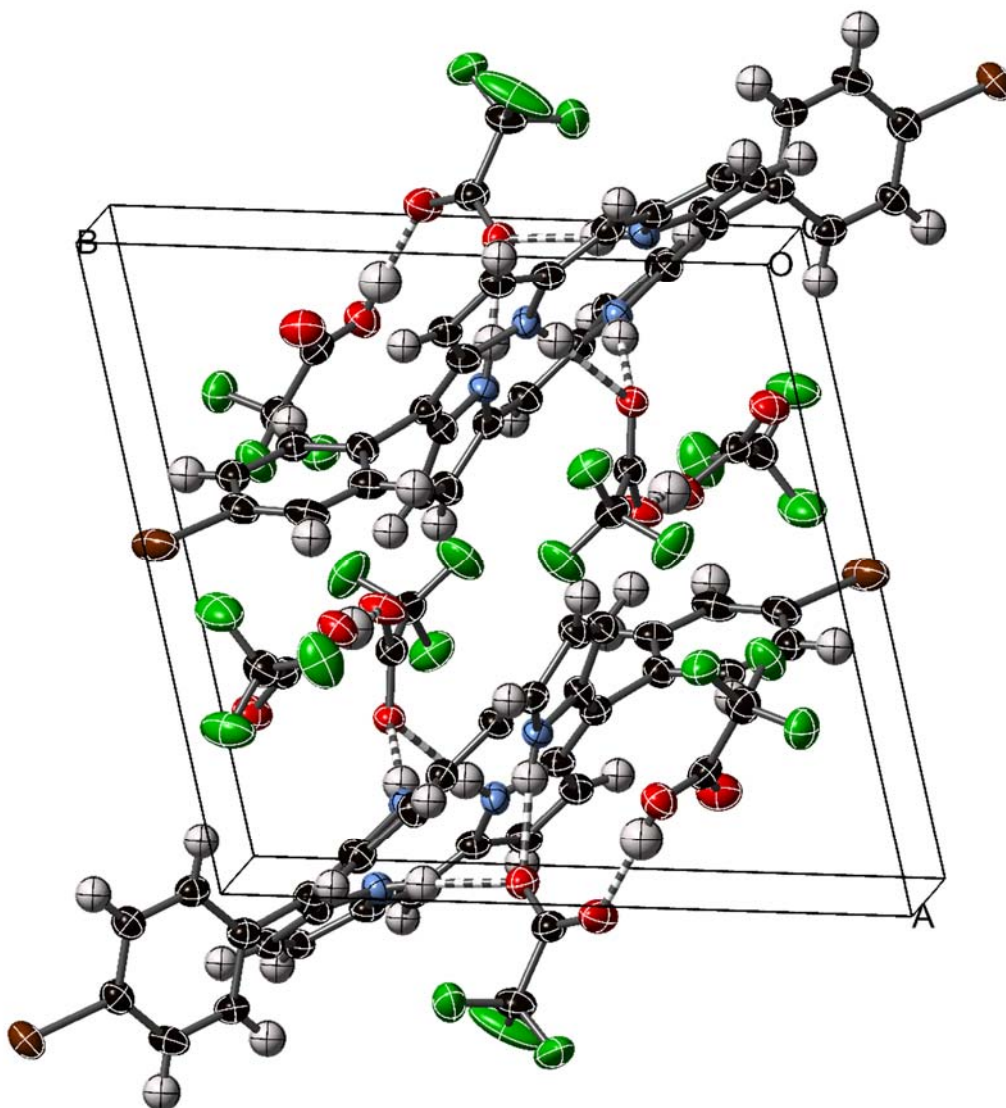

c) The molecules within the unit cell of compound  $[H_418][CF_3CO_2]_2 \cdot 2CF_3CO_2H$  ( $Z = 2$ ). Thermal ellipsoids are shown at 50% probability level.

2.2.12 Figure S2.2.12;  $[H_4\mathbf{19}][CF_3CO_2]_2 \cdot 2CF_3CO_2H$  5,15-bis(4-methylthiophenyl)porphyrindium bis(trifluoroacetate) bis(trifluoroacetic acid) solvate

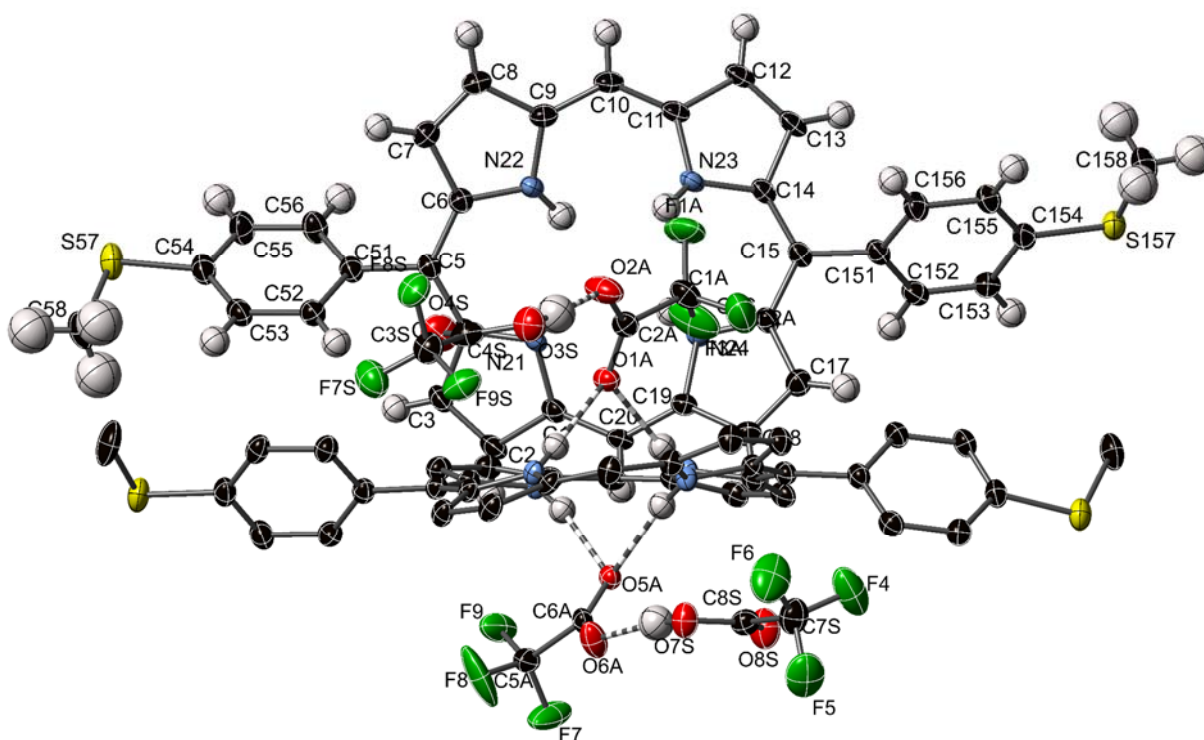

- A labelled plot of the atoms within the porphyrin component of the asymmetric unit of compound  $[H_4\mathbf{19}][CF_3CO_2]_2 \cdot 2CF_3CO_2H$ , 5,15-bis(4-methylthiophenyl)porphyrindium bis(trifluoroacetate) bis(trifluoroacetic acid) solvate. Thermal ellipsoids are shown at 50% probability level.
- Labelled plot of trifluoroacetate anions and trifluoroacetic acid solvate within the asymmetric unit of Compound  $[H_4\mathbf{19}][CF_3CO_2]_2 \cdot 2CF_3CO_2H$ , and the interaction with the porphyrin core. Thermal ellipsoids are shown at 50% probability level. H-atoms not involved in hydrogen bonding have been omitted.

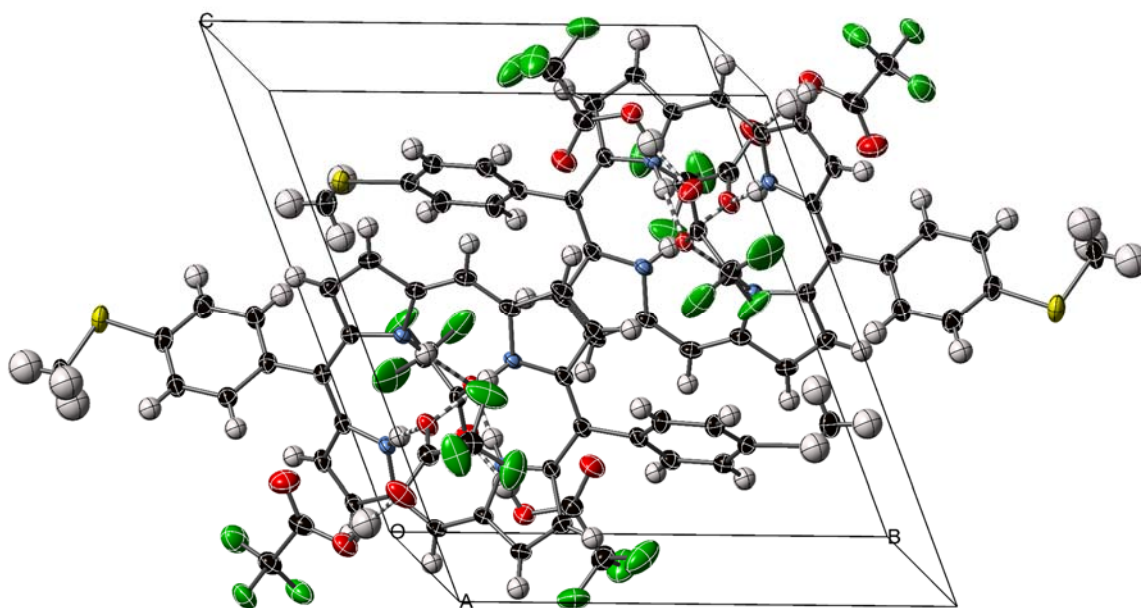

- c) The molecules within the unit cell of compound  $[\text{H}_4\mathbf{19}][\text{CF}_3\text{CO}_2]_2 \cdot 2\text{CF}_3\text{CO}_2\text{H}$  ( $Z = 2$ ). Thermal ellipsoids are shown at 50% probability level.

2.2.13 Figure S2.2.13; H<sub>2</sub>19 5,15-diphenyl-10-(thiophen-3-yl)porphyrin

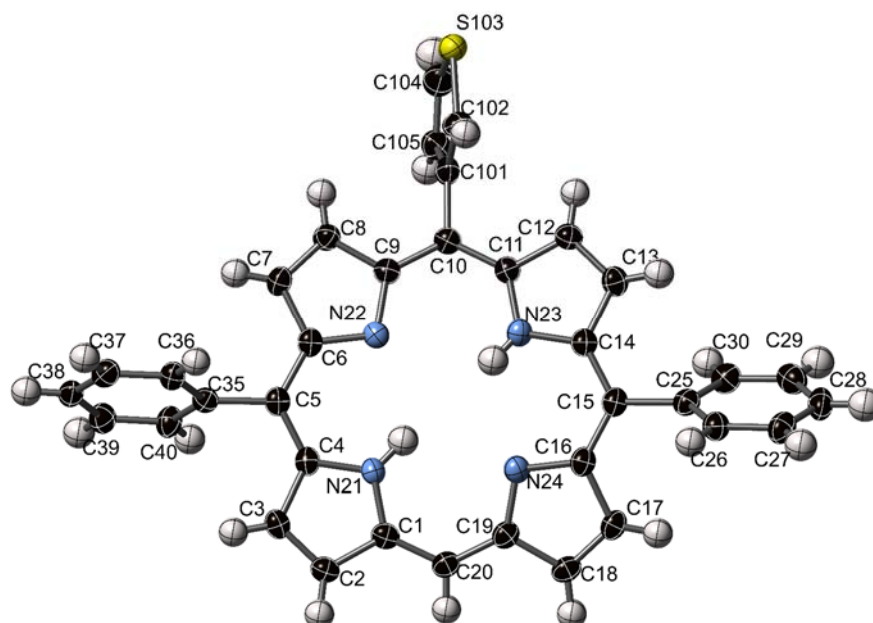

- a) A labelled plot of the atoms in the asymmetric unit of compound H<sub>2</sub>19, 5,15-diphenyl-10-(thiophen-3-yl)porphyrin. Thermal ellipsoids are shown at 50% probability level. Disorder of the thiophene component has been omitted from this view, and only the primary component (C101-C102-S103-C104-C105, 62%) is shown.

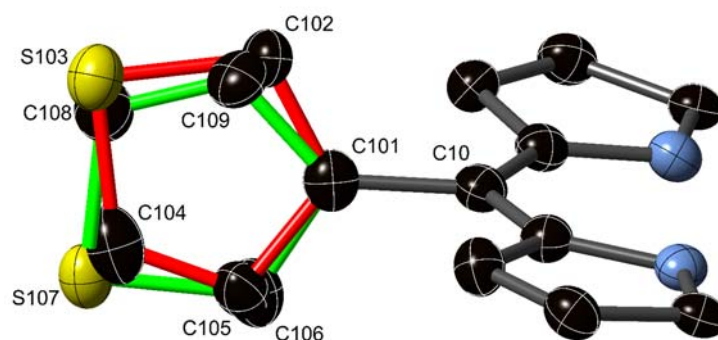

- b) A view of the two-component disorder model of the thiophene at the 10-position of the porphyrin ring. These two orientations are shown in red bonds (C101-C102-S103-C104-C105, 62%) and green bonds (C101-C106-S107-C108-C109, 38%), representing approx. 180° rotation of the thiophene around the thiophene-porphyrin bond. These atoms were constrained by SADI and SIMU commands. H-atoms are omitted.

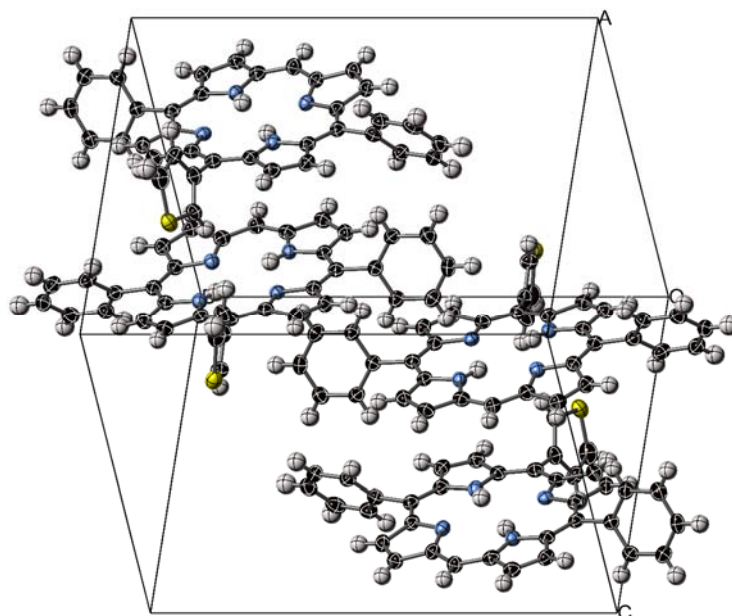

- c) The molecules within the unit cell of compound  $H_2\mathbf{19}$  ( $Z = 2$ ). Thermal ellipsoids are shown at 50% probability level. Disorder of the thiophene component has been omitted from this view, and only the primary component (C101-C102-S103-C104-C105, 62%) is shown.

2.2.14 Figure S2.2.14;  $[H_420][ClO_4]_2$  5-bromo-10,20-diphenylporphyrindi-ium diperchlorate

a) A labelled plot of the porphyrin component of the asymmetric unit of compound

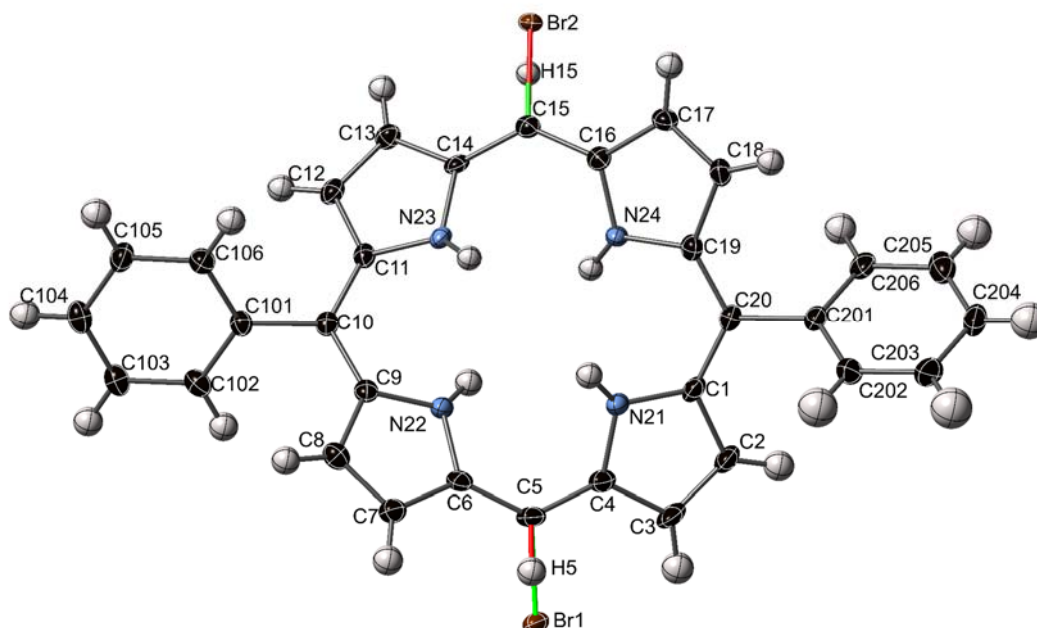

$[H_420][ClO_4]_2$ , 5-bromo-10,20-diphenylporphyrindi-ium diperchlorate. Thermal ellipsoids are shown at 50% probability level. Disorder of the bromo component (Br1, 91% and Br2, 28%) is shown in red and green bonds, however a significant component of this crystal could only be accounted for by an assumed impurity of 5,15-dibromo-10,20-diphenylporphyrindi-ium diperchlorate.

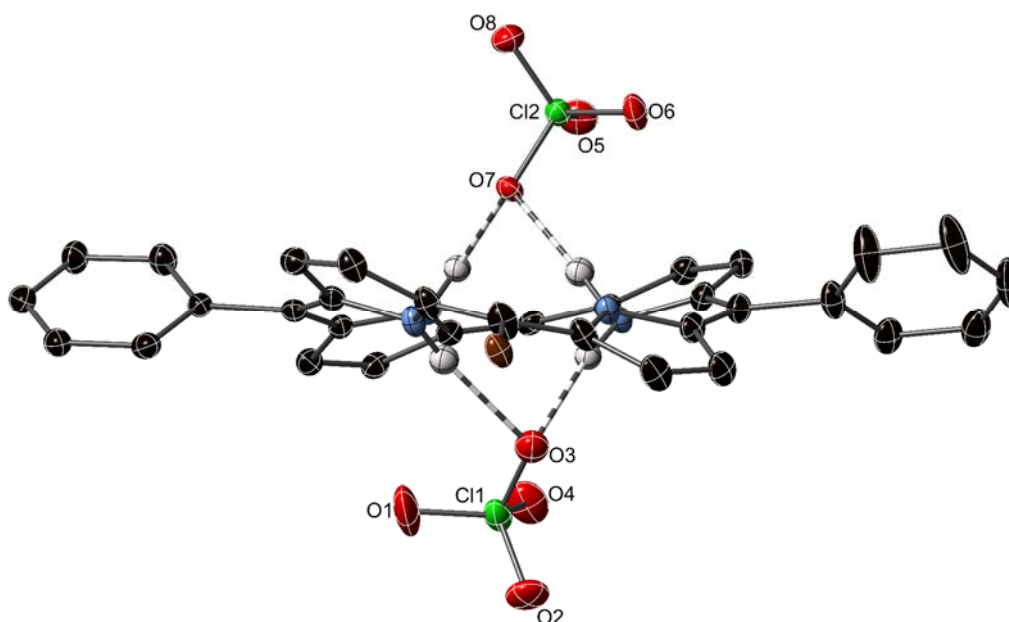

b) A labelled plot of perchlorate anions in the asymmetric unit of compound  $[H_420][ClO_4]_2$ . Thermal ellipsoids are shown at 50% probability level, and H-atoms not involved in hydrogen bonding are omitted. Disordered H- and Br atoms are omitted from this view, with only the principal molecular component (Br1, 91% and H15, 72%) shown.



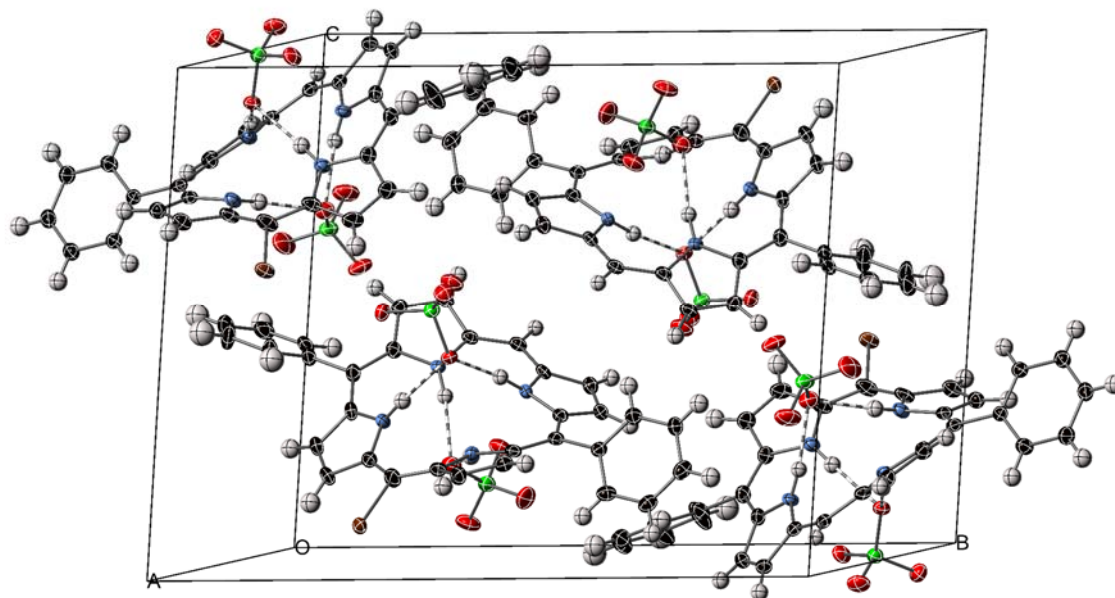

- c) The molecules within the unit cell of compound  $[H_4\cdot 20][ClO_4]_2$  ( $Z = 4$ ). Thermal ellipsoids are shown at 50% probability level. Disordered H- and Br atoms are omitted from this view, with only the principal molecular component (Br1, 91% and H15, 72%) shown.

2.2.15 Figure S2.2.15;  $[H_4\mathbf{21}][CF_3CO_2]_2 \cdot 2CF_3CO_2H$  5,15-dibromo-10,20-bis(4-tolyl)porphyrindi-ium bis(trifluoroacetate) bis(trifluoroacetic acid) solvate

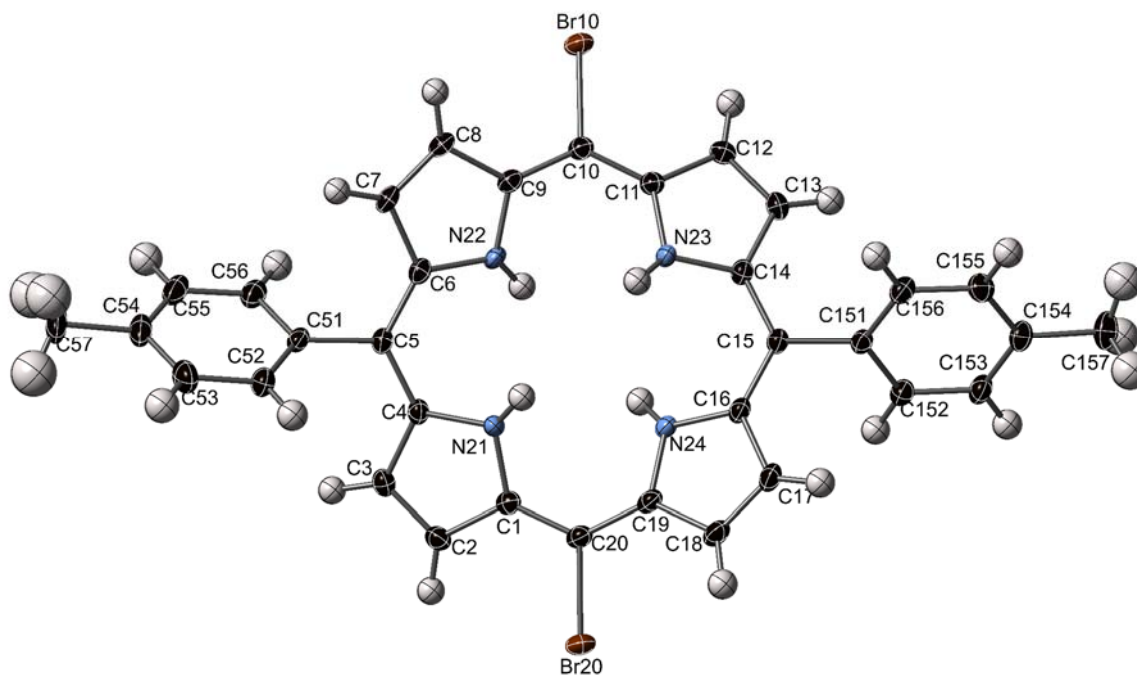

- a) A labelled plot of the porphyrin component of the asymmetric unit of compound  $[H_4\mathbf{21}][CF_3CO_2]_2 \cdot 2CF_3CO_2H$ , 5-bromo-10,20-diphenylporphyrindi-ium diperchlorate. Thermal ellipsoids are shown at 50% probability level.

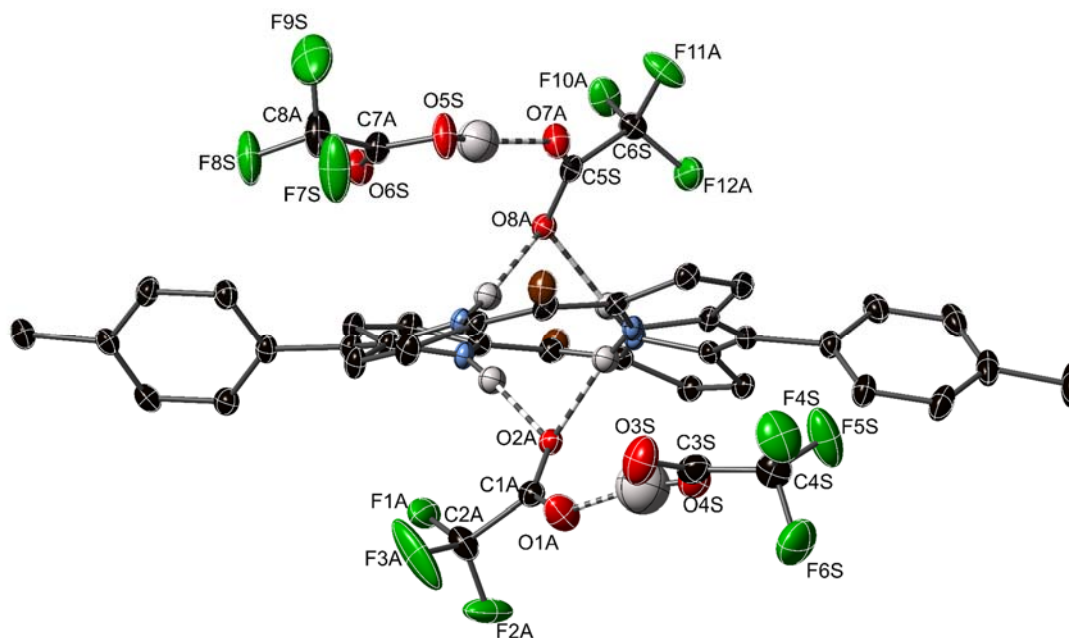

- b) A labelled plot of the trifluoroacetate anions and trifluoroacetic acid solvate molecules in the asymmetric unit of compound  $[H_4\mathbf{21}][CF_3CO_2]_2 \cdot 2CF_3CO_2H$ . Thermal ellipsoids are shown at 50% probability level, and H-atoms not involved in hydrogen bonding are omitted from this view.

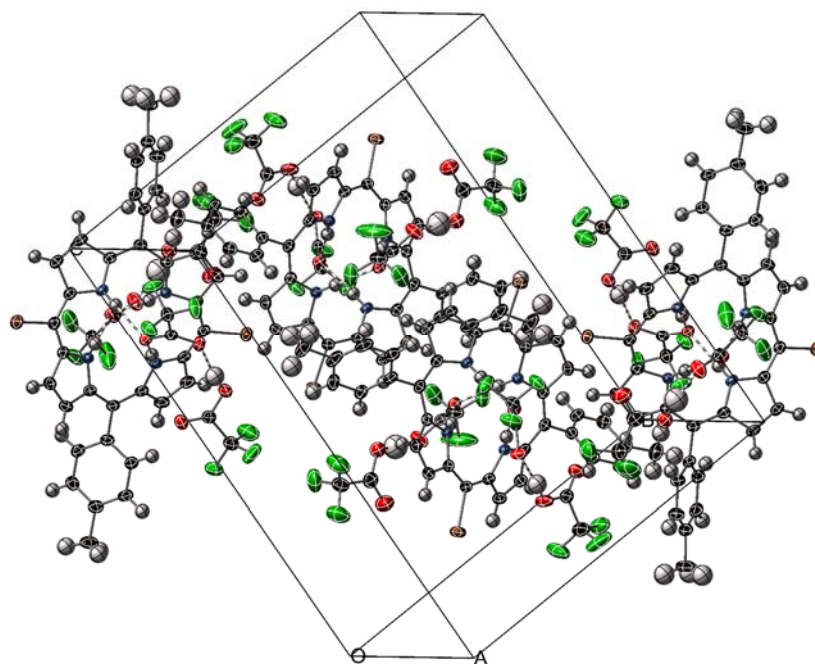

- c) The molecules within the unit cell of compound  $[H_4\mathbf{21}][CF_3CO_2]_2 \cdot 2CF_3CO_2H$  ( $Z = 4$ ). Thermal ellipsoids are shown at 50% probability level.

2.2.16 Figure S2.2.16;  $[H_4\mathbf{22}][MeSO_4]_2 \cdot \frac{1}{2}H_2O$  5,15-bis(4-ethynylphenyl)-10,20-diphenylporphyrindi-ium bis(methylsulfate) hemiaqua solvate

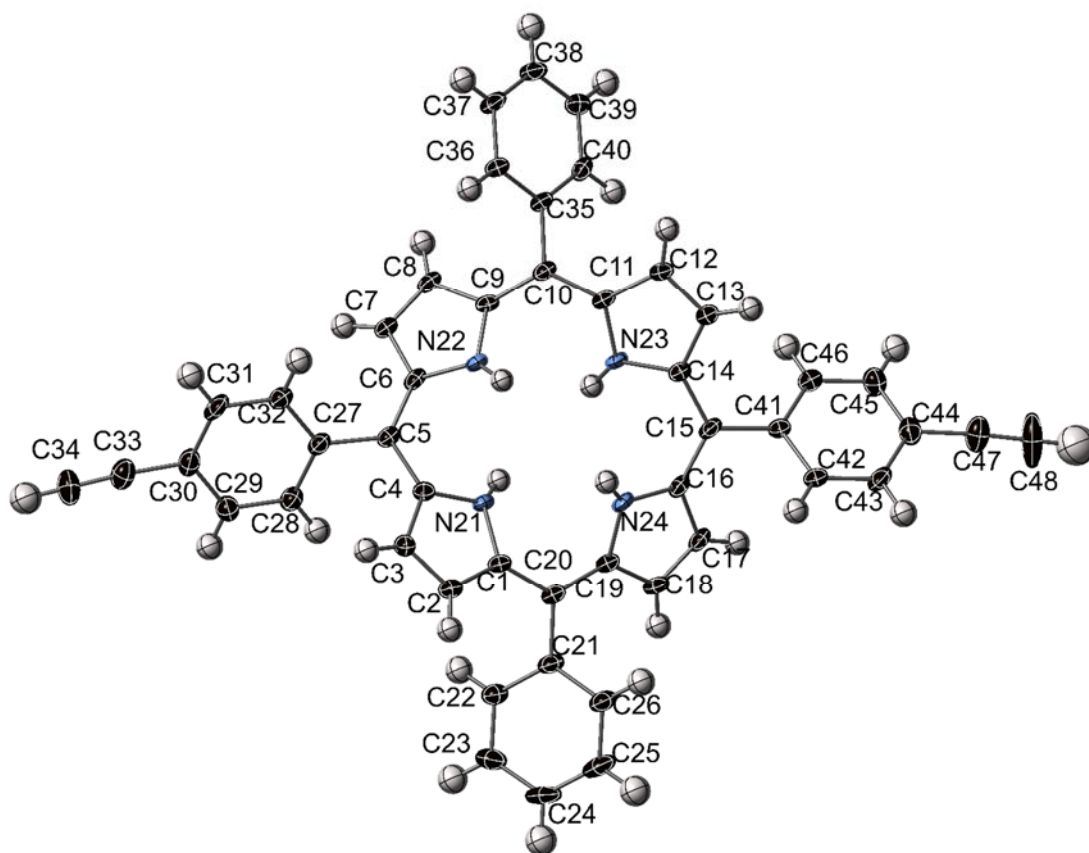

- a) A labelled plot of the porphyrin component of the asymmetric unit of compound  $[H_4\mathbf{22}][MeSO_4]_2 \cdot \frac{1}{2}H_2O$ , 5,15-bis(4-ethynylphenyl)-10,20-diphenylporphyrindi-ium bis(methylsulfate) hemiaqua solvate. Thermal ellipsoids are shown at 50% probability level.
- b) A labelled plot of one of the disordered methylsulfate anions. Orientations are shown in

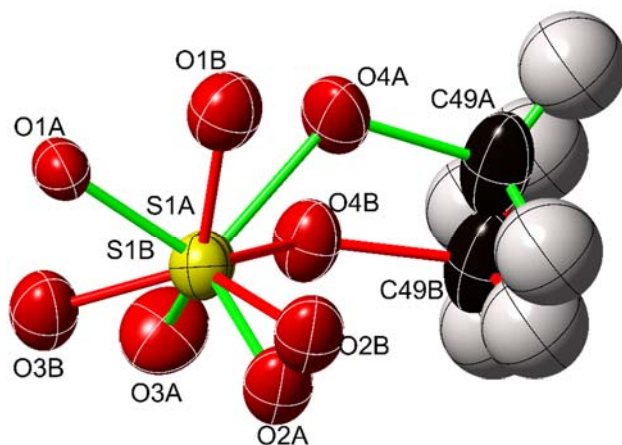

green bonds (S1A, O1A-O4A and C49A, 92%) and red bonds (S1B, O1B-O4B and C49B, 8%)

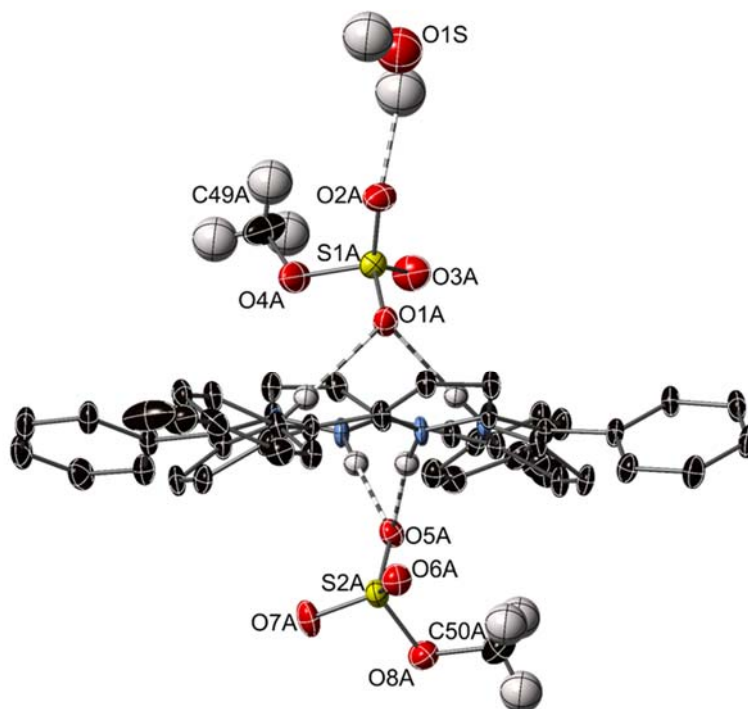

- c) A labelled plot of the methylsulfate anions and water solvate molecule in the asymmetric unit of compound  $[\text{H}_4\mathbf{22}][\text{MeSO}_4]_2 \cdot \frac{1}{4}\text{H}_2\text{O}$ . Thermal ellipsoids are shown at 50% probability level, and H-atoms not involved in hydrogen bonding are omitted from this view. Disorder of the methylsulfate anions is omitted from this view, with only the primary component shown.

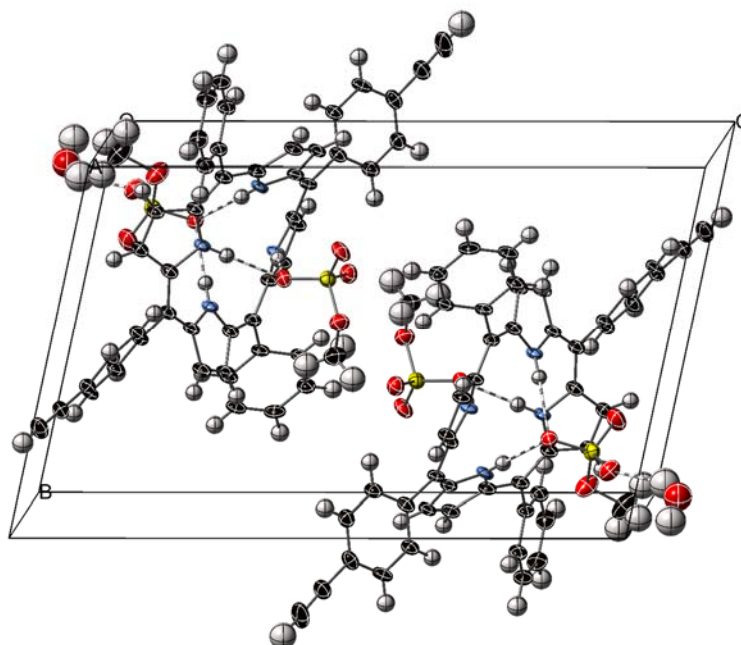

- d) The molecules within the unit cell of Compound  $[\text{H}_4\mathbf{22}][\text{MeSO}_4]_2 \cdot \frac{1}{4}\text{H}_2\text{O}$  ( $Z = 2$ ). Thermal ellipsoids are shown at 50% probability level.

2.2.17 Figure S2.2.17;  $[\text{H}_8\mathbf{23}][\text{ClO}_4]_4 \cdot 2\text{H}_2\text{O}$  5,5'-Bis(15-hexyl-10,20-bis(4-methoxyphenyl)porphyrindi-ium) tetrakis(perchlorate) diaqua solvate

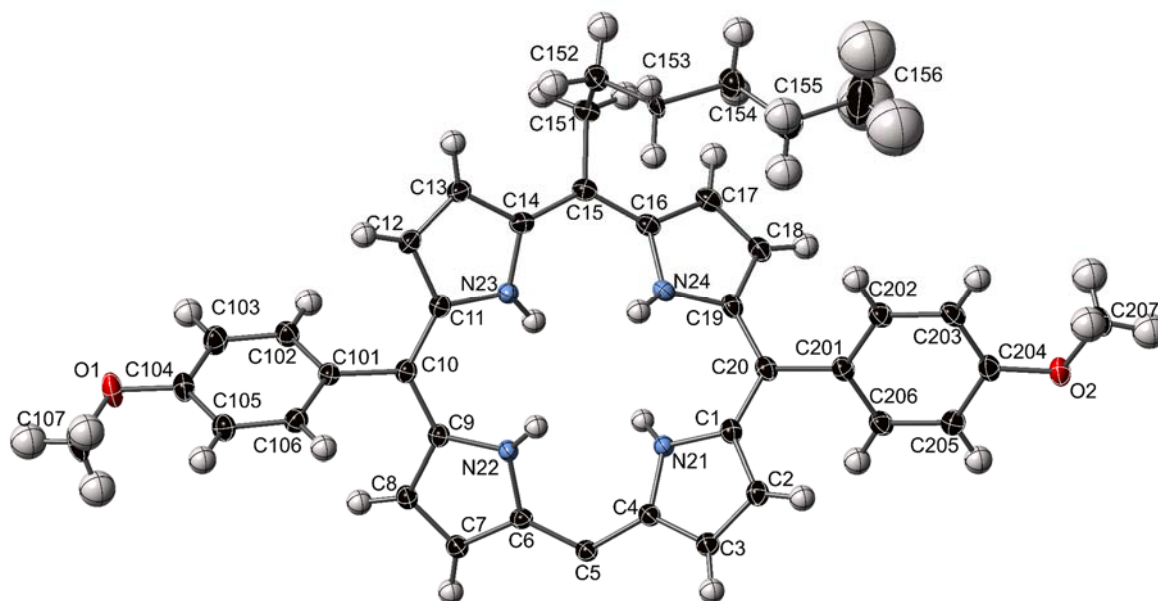

- a) A labelled plot of the porphyrin component of the asymmetric unit of compound  $[\text{H}_8\mathbf{23}][\text{ClO}_4]_4 \cdot 2\text{H}_2\text{O}$ , 5,5'-Bis(15-hexyl-10,20-bis(4-methoxyphenyl)porphyrindi-ium) tetrakis(perchlorate) diaqua solvate. This molecular fragment is linked to another equivalent porphyrin at the 5- position, and these two halves of the bis-porphyrin are related by a two-fold rotation axis which runs through the centre of the C5 – C5' bond, parallel to the crystallographic *b*-axis, Thermal ellipsoids are shown at 50% probability level.

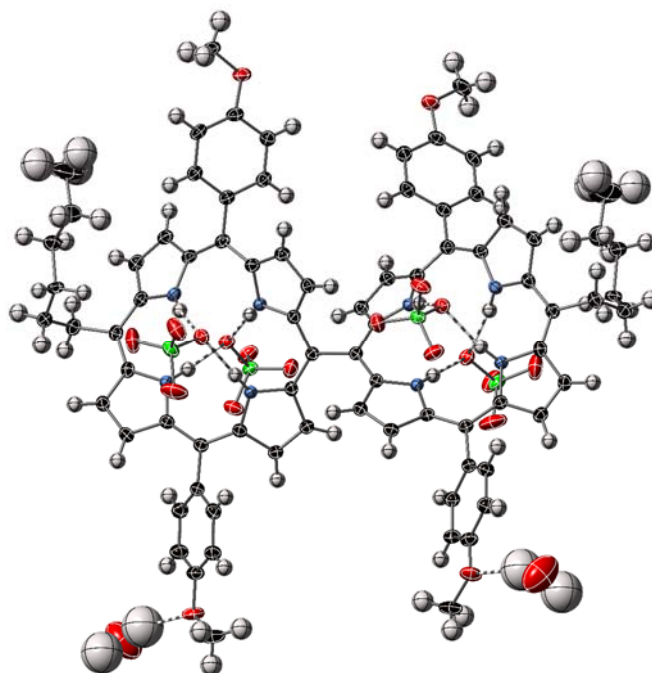

- b) A plot of the atoms within the molecular unit, which is twice the asymmetric unit of the crystal structure of compound  $[\text{H}_8\mathbf{23}][\text{ClO}_4]_4 \cdot 2\text{H}_2\text{O}$ .

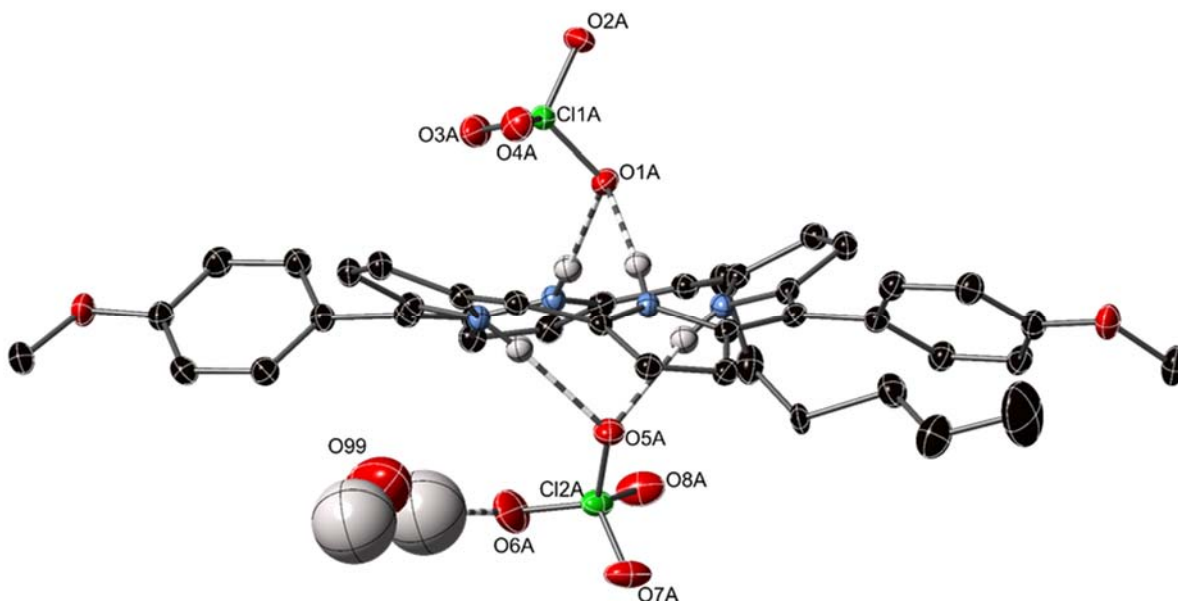

- c) A labelled plot of the perchlorate anions and water solvate within the asymmetric unit of compound  $[H_8\mathbf{23}][ClO_4]_4 \cdot 2H_2O$ . Hydrogen bonds are indicated by striped bonds, H-atoms not involved in hydrogen bonding are omitted from this view. Disorder of the *n*-hexyl group at the 15 position of the porphyrin ring is omitted, with only the primary component (C153-C156, 63%) shown in this view.

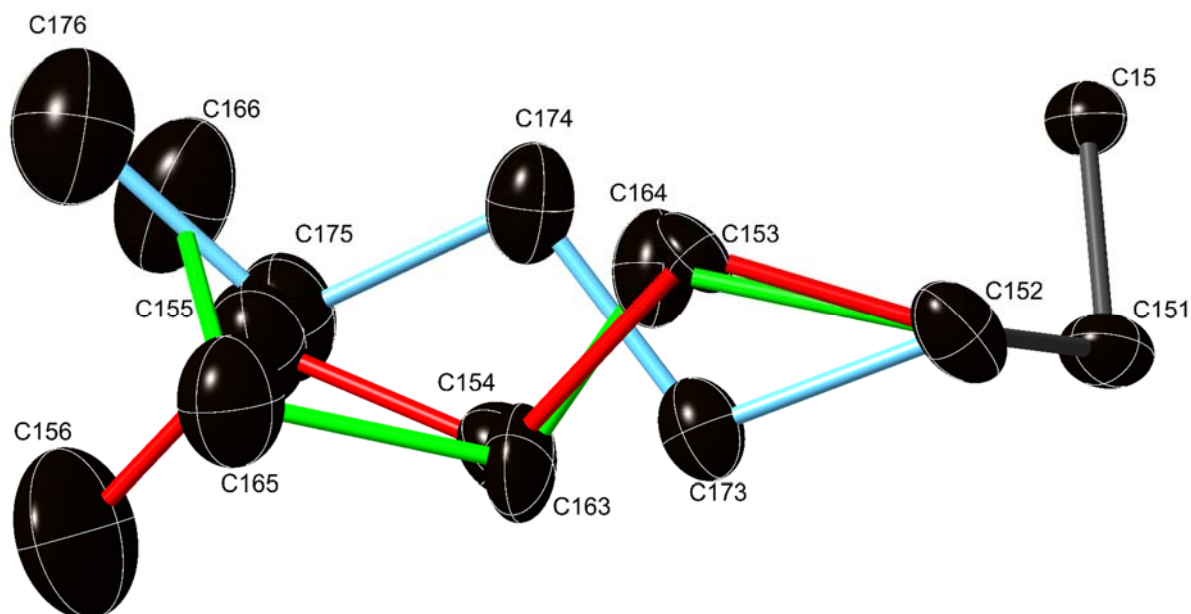

- d) A view of the disorder of the alkyl chain at the 15 position of the porphyrin ring. This hexyl chain was modelled as disordered over 3 orientations, sharing the positions C151 and C152 (100%, black bonds), and disordered C153-C156 (63%, red bonds) C163-C166 (26%, green bonds) and C173-C176 (11%, blue bonds). Hydrogen atoms attached to each of these carbon atoms are omitted from view.

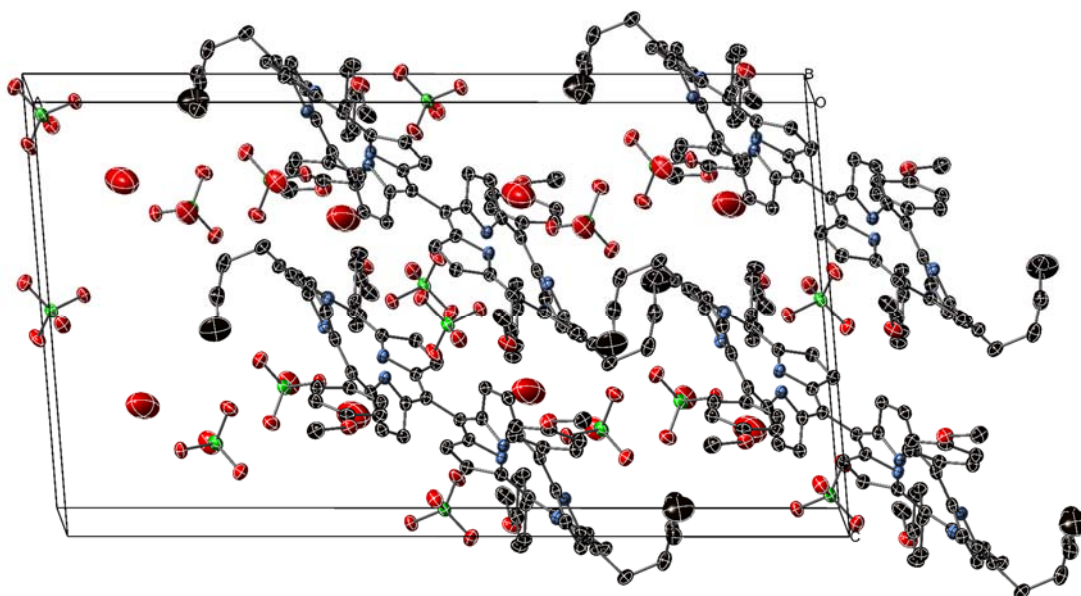

- e) The molecules within the unit cell of compound  $[\text{H}_8\mathbf{23}][\text{ClO}_4]_4 \cdot 2\text{H}_2\text{O}$  ( $Z = 4$ ). Thermal ellipsoids are shown at 50% probability level. H-atoms have been omitted from view, as have the minor components of the hexyl group disorder.



2.2.18 Figure S2.2.18;  $[H_8\mathbf{24}][CF_3CO_2]_4 \cdot 14H_2O$  5,5'-bis(10,15,20-triphenylporphyrindi-ium) tetrakis(trifluoroacetate)

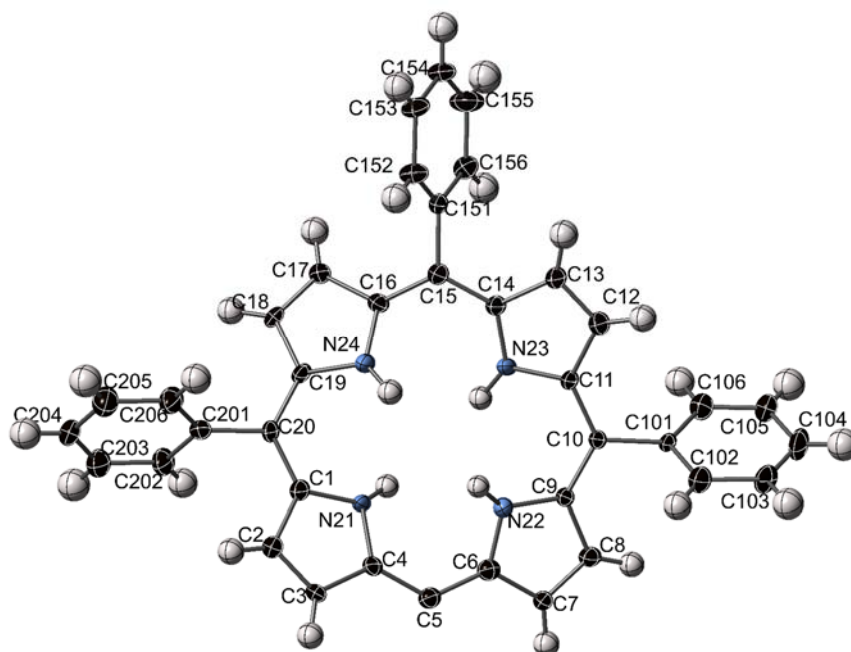

- a) A labelled plot of the porphyrin component of the asymmetric unit of compound  $[H_8\mathbf{24}][CF_3CO_2]_4 \cdot 14H_2O$ , 5,5'-bis(10,15,20-triphenylporphyrindi-ium) tetrakis(trifluoroacetate). This molecular fragment is linked to another equivalent porphyrin at the 5- position, and these two halves of the bis-porphyrin are related by a two-fold rotation axis which runs through the centre of the C5 – C5' bond, parallel to the crystallographic *b*- axis, thermal ellipsoids are shown at 50% probability level.

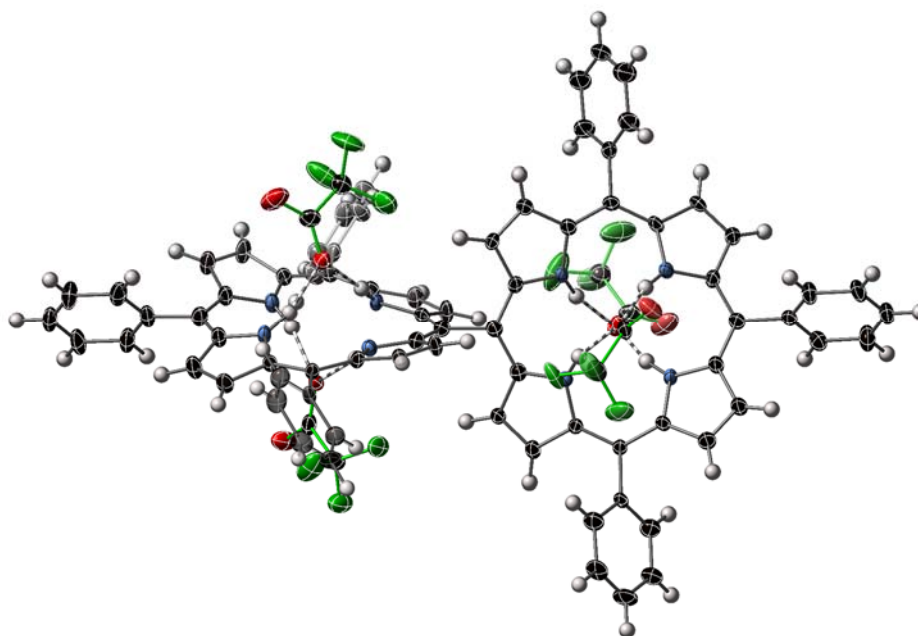

- b) A labelled plot molecular unit of Compound  $[H_8\mathbf{24}][CF_3CO_2]_4 \cdot 14H_2O$ , which comprises two of the asymmetric units. Non-H atoms are represented as thermal ellipsoids, H-atoms are represented as spheres of radius 0.3 Å. Thermal ellipsoids are shown at 50% probability level.

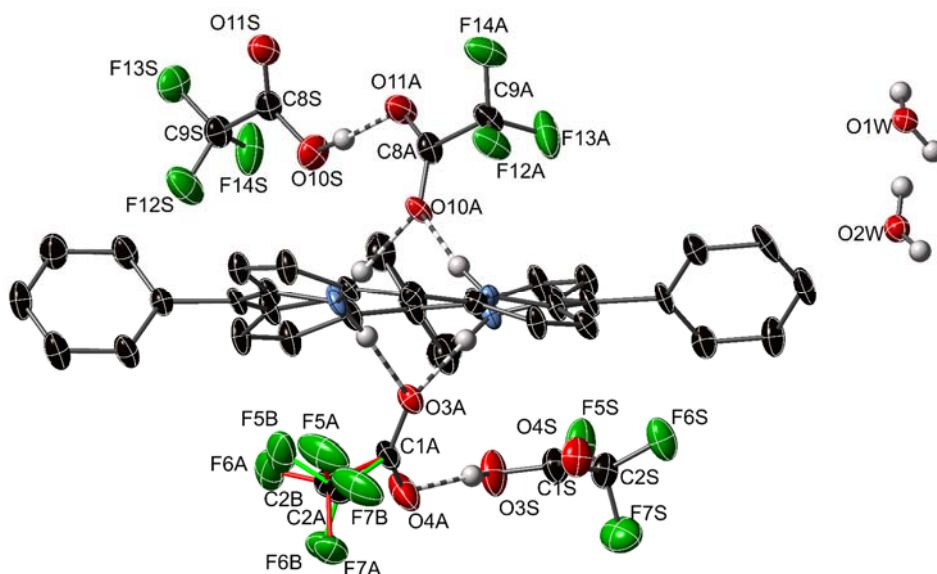

- c) A labelled plot of the anions and solvent molecules in the asymmetric unit of compound  $[H_8\mathbf{24}][CF_3CO_2]_4 \cdot 14H_2O$ . Non-H atoms are represented as thermal ellipsoids, H-atoms are represented as spheres of radius 0.3 Å, H-atoms not involved in hydrogen bonding have been omitted. Thermal ellipsoids are shown at 50% probability level.

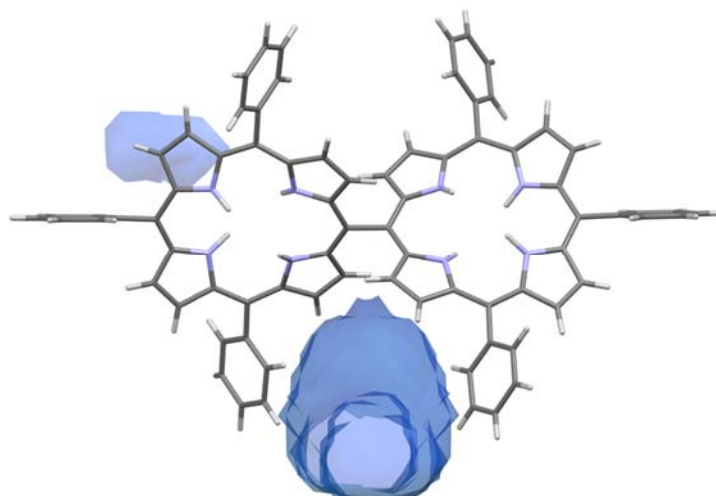

- d) A plot of solvent voids within the crystal structure of compound  $[H_8\mathbf{24}][CF_3CO_2]_4 \cdot 14H_2O$  which had to be accounted for with Squeeze, in Platon. Atoms of the main fragment, anions, solvent are omitted from view. 4 equivalent disconnected voids, one per porphyrin dimer, are present within the unit cell, each containing 14 disordered water molecules, assigned from the electron density (550 e<sup>-</sup> per unit cell).

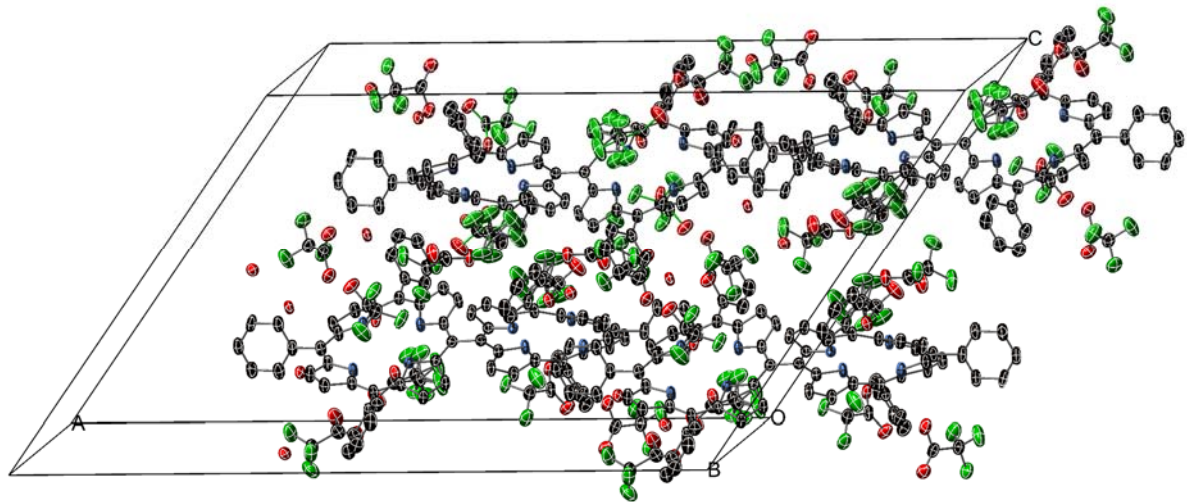

- e) A plot of atoms within the unit cell of compound  $[\text{H}_8\mathbf{24}][\text{CF}_3\text{CO}_2]_4 \cdot 14\text{H}_2\text{O}$  ( $Z = 4$ ). H-atoms are omitted, Thermal parameters are shown at a 50% probability level.

### 2.3 Normal-coordinate Structural Decomposition (NSD)

Normal-coordinate structural decomposition was performed using a new implementation (Kingsbury and Senge) of the porphyrin NSD method, with this tool available online at

<https://chemistry.tcd.ie/staff/people/mos/NSD.html> using the methodology of Jentzen *et al* (W.

Jentzen, X. Z. Song, and J. A. Shelnut, **1997**, *J. Phys. Chem. B*, *101*, 9, 1684-1699). A publication relating to the use and interpretation of these results is currently in preparation.

The critical values in this analysis are the  $B_{2u}(1)$  and  $B_{2u}(2)$ , for saddle-shaped porphyrins,  $B_{2g}(1)$  and  $B_{2g}(2)$  for 5,15-disubstituted porphyrins, and  $B_{1g}(2)$ , which is indicative of freebases.  $A_{1g}(2)$  and  $A_{1g}(3)$  are generally correlated with saddle-shaped out-of-plane distortions, representing the in-plane compensation for these out-of-plane distortions.

### 2.3.1 NSD result generated from H<sub>2</sub>11 (5,15-diphenylporphyrin)

Summary of the NSD (in Å):

| basis | $\Delta_{ip}$ | $\delta_{ip}$ | $B_{2g}$ | $B_{1g}$ | $E_u(x)$ | $E_u(y)$ | $A_{1g}$ | $A_{2g}$ |
|-------|---------------|---------------|----------|----------|----------|----------|----------|----------|
| min.  | 0.38          | 0.02          | 0.31     | -0.06    | 0.00     | 0.00     | 0.22     | 0.01     |
| ext.  | 0.40          | 0.01          | 0.31     | -0.06    | 0.00     | 0.00     | 0.22     | 0.01     |
|       |               |               | 0.06     | -0.08    | 0.00     | 0.00     | -0.02    | 0.00     |
| total | 0.41          | 0.00          | 0.31     | -0.06    | 0.00     | 0.00     | 0.22     | 0.01     |
|       |               |               | 0.06     | -0.09    | 0.00     | 0.00     | -0.02    | 0.00     |
|       |               |               | 0.01     | -0.07    | 0.00     | 0.00     | 0.05     | 0.00     |
|       |               |               | 0.00     | 0.00     | 0.00     | 0.00     | 0.00     | 0.00     |
|       |               |               | 0.00     | 0.01     | 0.00     | 0.00     | 0.02     | 0.00     |
|       |               |               | 0.01     | -0.01    | 0.00     | 0.00     | 0.01     |          |
|       |               |               |          |          | 0.00     | 0.00     |          |          |
|       |               |               |          |          | 0.00     | 0.00     |          |          |
|       |               |               |          |          | 0.00     | 0.00     |          |          |
|       |               |               |          |          | 0.00     | 0.00     |          |          |
|       |               |               |          |          | 0.00     | 0.00     |          |          |
| comp. | 0.41          | 0.00          | 0.31     | 0.13     | 0.00     | 0.00     | 0.23     | 0.02     |

| basis | $\Delta_{oop}$ | $\delta_{oop}$ | $B_{2u}$ | $B_{1u}$ | $A_{2u}$ | $E_g(x)$ | $E_g(y)$ | $A_{1u}$ |
|-------|----------------|----------------|----------|----------|----------|----------|----------|----------|
| min.  | 0.21           | 0.06           | 0.00     | 0.00     | 0.00     | 0.12     | -0.17    | 0.00     |
| ext.  | 0.32           | 0.00           | 0.00     | 0.00     | 0.00     | 0.13     | -0.17    | 0.00     |
|       |                |                | 0.00     | 0.00     | 0.00     | 0.23     | -0.06    | 0.00     |
| total | 0.32           | 0.00           | 0.00     | 0.00     | 0.00     | 0.13     | -0.17    | 0.00     |
|       |                |                | 0.00     | 0.00     | 0.00     | 0.23     | -0.06    | 0.00     |
|       |                |                | 0.00     | 0.00     | 0.00     | 0.02     | 0.03     |          |
|       |                |                |          |          |          | 0.00     | 0.01     |          |
|       |                |                |          |          |          | 0.00     | -0.01    |          |
| comp. | 0.32           | 0.00           | 0.00     | 0.00     | 0.00     | 0.26     | 0.19     | 0.00     |

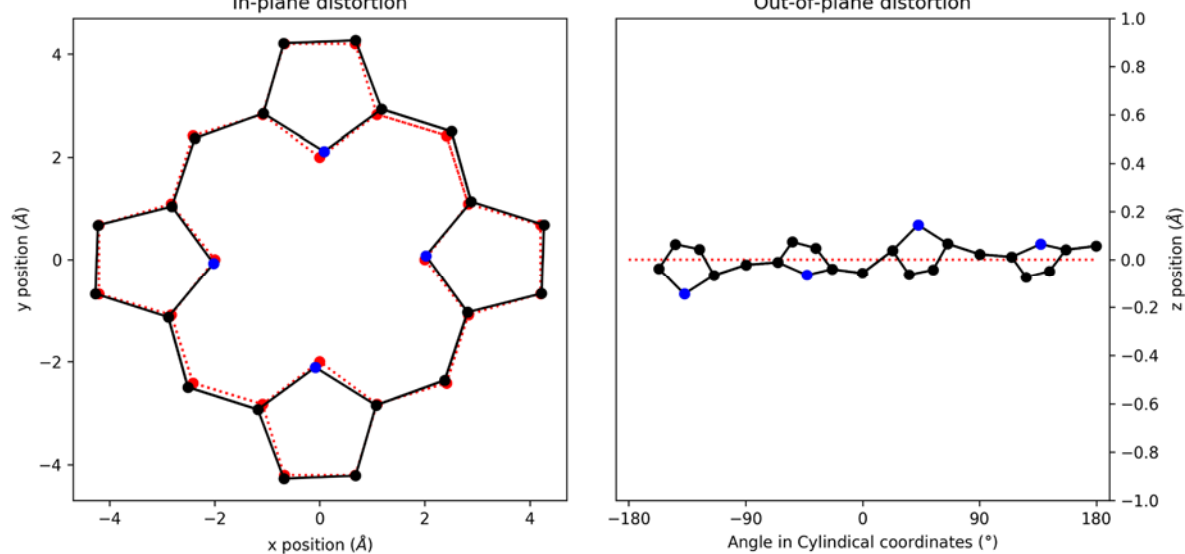

Figure S2.01; (a) out-of-plane and (b) in-plane skeletal plots of the porphyrin core. Porphyrin is represented in black(C) and blue(N), with the reference structure (CuTPP) in red lines.

### 2.3.2 NSD result generated from $\text{H}_2\mathbf{11}\cdot\text{CH}_2\text{Cl}_2$ (5,15-diphenylporphyrin DCM)

Summary of the NSD (in Å):

| basis | $\Delta_{ip}$ | $\delta_{ip}$ | $B_{2g}$ | $B_{1g}$ | $E_u(x)$ | $E_u(y)$ | $A_{1g}$ | $A_{2g}$ |
|-------|---------------|---------------|----------|----------|----------|----------|----------|----------|
| min.  | 0.40          | 0.01          | -0.35    | -0.04    | -0.01    | -0.01    | 0.19     | 0.00     |
| ext.  | 0.41          | 0.00          | -0.36    | -0.04    | -0.01    | -0.01    | 0.19     | 0.00     |
|       |               |               | -0.07    | -0.02    | 0.00     | 0.01     | 0.00     | 0.00     |
| total | 0.42          | 0.00          | -0.35    | -0.04    | -0.01    | -0.01    | 0.19     | 0.00     |
|       |               |               | -0.07    | -0.02    | 0.00     | 0.01     | 0.00     | 0.00     |
|       |               |               | -0.01    | -0.02    | 0.00     | 0.00     | 0.05     | -0.01    |
|       |               |               | 0.01     | 0.00     | 0.00     | 0.00     | -0.02    | 0.00     |
|       |               |               | 0.00     | -0.01    | 0.00     | 0.00     | 0.00     | 0.00     |
|       |               |               | -0.01    | -0.01    | 0.00     | 0.00     | 0.02     | 0.00     |
|       |               |               |          |          | 0.00     | 0.00     |          |          |
|       |               |               |          |          | 0.00     | 0.00     |          |          |
|       |               |               |          |          | 0.00     | 0.00     |          |          |
|       |               |               |          |          | 0.00     | 0.00     |          |          |
|       |               |               |          |          | 0.00     | 0.00     |          |          |
|       |               |               |          |          | 0.00     | 0.00     |          |          |
|       |               |               |          |          | 0.00     | 0.00     |          |          |
|       |               |               |          |          | 0.00     | 0.00     |          |          |
|       |               |               |          |          | 0.00     | -0.01    |          |          |
| comp. | 0.42          | 0.00          | 0.36     | 0.05     | 0.01     | 0.02     | 0.20     | 0.01     |

  

| basis | $\Delta_{oop}$ | $\delta_{oop}$ | $B_{2u}$ | $B_{1u}$ | $A_{2u}$ | $E_g(x)$ | $E_g(y)$ | $A_{1u}$ |
|-------|----------------|----------------|----------|----------|----------|----------|----------|----------|
| min.  | 0.46           | 0.00           | 0.04     | -0.45    | 0.08     | 0.02     | 0.01     | 0.00     |
| ext.  | 0.46           | 0.00           | 0.03     | -0.45    | 0.08     | 0.02     | 0.01     | 0.00     |
|       |                |                | -0.05    | -0.01    | -0.02    | -0.02    | 0.00     | -0.01    |
| total | 0.47           | 0.00           | 0.03     | -0.45    | 0.08     | 0.02     | 0.01     | 0.00     |
|       |                |                | -0.05    | -0.01    | -0.02    | -0.02    | 0.00     | -0.01    |
|       |                |                | 0.00     | -0.01    | 0.01     | 0.00     | 0.00     | 0.00     |
|       |                |                |          |          |          | 0.00     | 0.00     |          |
|       |                |                |          |          |          | 0.00     | 0.00     |          |
| comp. | 0.47           | 0.00           | 0.06     | 0.45     | 0.08     | 0.03     | 0.01     | 0.01     |

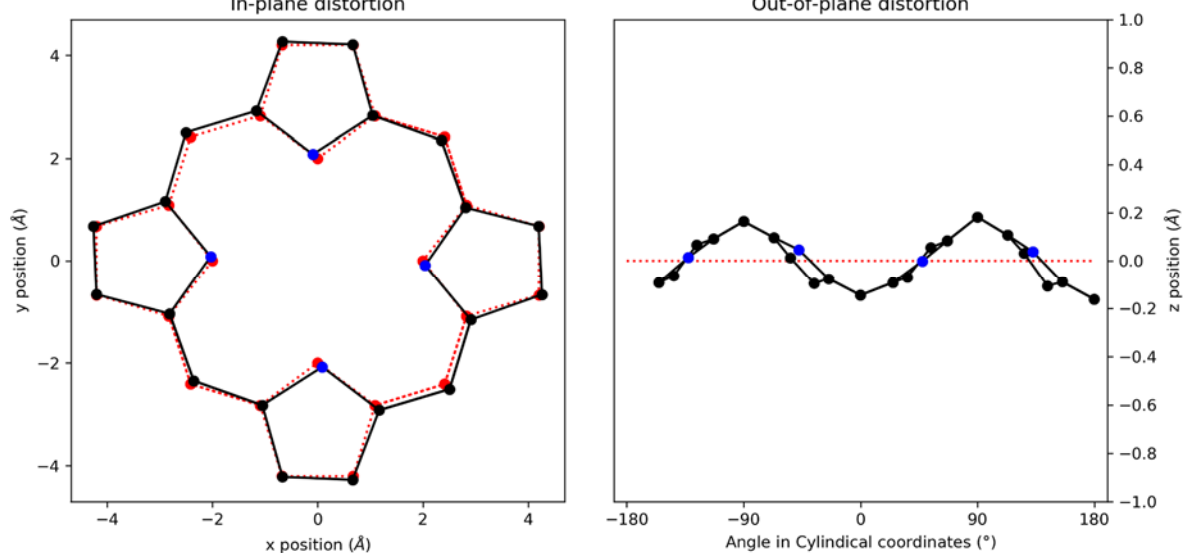

Figure S2.02; (a) out-of-plane and (b) in-plane skeletal plots of the porphyrin core. Porphyrin is represented in black(C) and blue(N), with the reference structure (CuTPP) in red lines.

### 2.3.3 NSD result generated from [H<sub>4</sub>11][CF<sub>3</sub>CO<sub>2</sub>]<sub>2</sub> (5,15-diphenylporphyrindi-ium bis(trifluoroacetate))

Summary of the NSD (in Å):

| basis | $\Delta_{ip}$ | $\delta_{ip}$ | $B_{2g}$ | $B_{1g}$ | $E_u(x)$ | $E_u(y)$ | $A_{1g}$ | $A_{2g}$ |
|-------|---------------|---------------|----------|----------|----------|----------|----------|----------|
| min.  | 0.30          | 0.14          | -0.28    | -0.07    | 0.01     | -0.01    | 0.09     | -0.01    |
| ext.  | 0.35          | 0.10          | -0.28    | -0.07    | 0.01     | -0.01    | 0.09     | -0.01    |
|       |               |               | -0.04    | 0.00     | 0.01     | -0.02    | -0.17    | -0.01    |
| total | 0.48          | 0.00          | -0.28    | -0.07    | 0.01     | -0.01    | 0.11     | -0.01    |
|       |               |               | -0.04    | 0.00     | 0.01     | -0.02    | -0.17    | -0.01    |
|       |               |               | -0.02    | 0.06     | 0.01     | -0.01    | 0.31     | 0.00     |
|       |               |               | 0.00     | 0.00     | 0.00     | 0.01     | -0.01    | 0.00     |
|       |               |               | 0.00     | 0.00     | 0.01     | 0.00     | 0.00     | 0.00     |
|       |               |               | -0.01    | -0.01    | 0.00     | 0.00     | -0.01    |          |
|       |               |               |          |          | 0.00     | 0.00     |          |          |
|       |               |               |          |          | 0.00     | 0.00     |          |          |
|       |               |               |          |          | 0.00     | 0.00     |          |          |
|       |               |               |          |          | 0.00     | 0.00     |          |          |
|       |               |               |          |          | 0.00     | 0.00     |          |          |
|       |               |               |          |          | 0.00     | 0.00     |          |          |
| comp. | 0.48          | 0.00          | 0.28     | 0.09     | 0.02     | 0.02     | 0.37     | 0.02     |

  

| basis | $\Delta_{oop}$ | $\delta_{oop}$ | $B_{2u}$ | $B_{1u}$ | $A_{2u}$ | $E_g(x)$ | $E_g(y)$ | $A_{1u}$ |
|-------|----------------|----------------|----------|----------|----------|----------|----------|----------|
| min.  | 1.84           | 0.31           | 1.83     | -0.09    | 0.18     | -0.05    | 0.01     | 0.04     |
| ext.  | 1.91           | 0.00           | 1.82     | -0.09    | 0.18     | -0.05    | 0.01     | 0.04     |
|       |                |                | -0.55    | -0.01    | -0.01    | 0.05     | -0.05    | -0.01    |
| total | 1.92           | 0.00           | 1.82     | -0.09    | 0.18     | -0.05    | 0.01     | 0.04     |
|       |                |                | -0.55    | -0.01    | -0.01    | 0.05     | -0.05    | -0.01    |
|       |                |                | -0.05    | 0.00     | 0.01     | 0.02     | -0.01    |          |
|       |                |                |          |          |          | 0.00     | -0.01    |          |
|       |                |                |          |          |          | 0.00     | 0.00     |          |
| comp. | 1.92           | 0.00           | 1.90     | 0.09     | 0.18     | 0.07     | 0.05     | 0.04     |

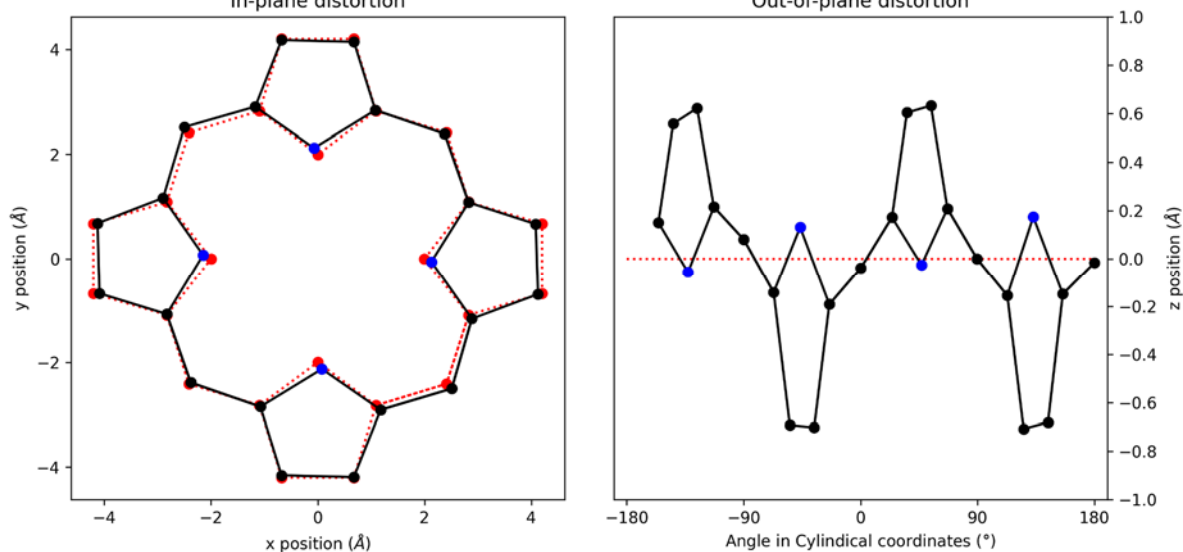

Figure S2.03; (a) out-of-plane and (b) in-plane skeletal plots of the porphyrin core. Porphyrin is represented in black(C) and blue(N), with the reference structure (CuTPP) in red lines.

2.3.4 NSD result generated from  $[H_4\mathbf{11}][CF_3CO_2]_2 \cdot 2CF_3CO_2H$  (5,15-diphenylporphyrindium bis(trifluoroacetate) bis(trifluoroacetic acid solvate))

Summary of the NSD (in Å):

| basis | $\Delta_{ip}$ | $\delta_{ip}$ | $B_{2g}$ | $B_{1g}$ | $E_u(x)$ | $E_u(y)$ | $A_{1g}$ | $A_{2g}$ |
|-------|---------------|---------------|----------|----------|----------|----------|----------|----------|
| min.  | 0.25          | 0.06          | 0.12     | -0.05    | 0.01     | -0.01    | 0.21     | 0.02     |
| ext.  | 0.28          | 0.05          | 0.12     | -0.05    | 0.01     | -0.01    | 0.20     | 0.02     |
|       |               |               | 0.03     | 0.00     | 0.01     | -0.01    | -0.12    | 0.04     |
| total | 0.36          | 0.00          | 0.12     | -0.05    | 0.01     | -0.01    | 0.22     | 0.02     |
|       |               |               | 0.03     | 0.00     | 0.01     | -0.01    | -0.11    | 0.04     |
|       |               |               | 0.02     | 0.00     | 0.01     | 0.00     | 0.22     | 0.01     |
|       |               |               | -0.01    | 0.00     | 0.00     | 0.00     | -0.01    | 0.01     |
|       |               |               | 0.00     | 0.00     | 0.00     | -0.01    | -0.02    | 0.00     |
|       |               |               | 0.02     | 0.00     | 0.00     | 0.00     | 0.00     |          |
|       |               |               |          |          | 0.01     | 0.00     |          |          |
|       |               |               |          |          | 0.00     | 0.00     |          |          |
|       |               |               |          |          | 0.00     | 0.00     |          |          |
|       |               |               |          |          | 0.00     | 0.00     |          |          |
|       |               |               |          |          | 0.00     | 0.00     |          |          |
| comp. | 0.36          | 0.00          | 0.13     | 0.05     | 0.02     | 0.02     | 0.33     | 0.05     |

  

| basis | $\Delta_{oop}$ | $\delta_{oop}$ | $B_{2u}$ | $B_{1u}$ | $A_{2u}$ | $E_g(x)$ | $E_g(y)$ | $A_{1u}$ |
|-------|----------------|----------------|----------|----------|----------|----------|----------|----------|
| min.  | 1.32           | 0.24           | -1.28    | -0.29    | 0.00     | -0.04    | 0.01     | 0.02     |
| ext.  | 1.40           | 0.00           | -1.27    | -0.29    | 0.00     | -0.04    | 0.01     | 0.02     |
|       |                |                | 0.49     | 0.00     | 0.02     | -0.01    | 0.01     | -0.01    |
| total | 1.40           | 0.00           | -1.27    | -0.29    | 0.00     | -0.04    | 0.01     | 0.02     |
|       |                |                | 0.50     | 0.00     | 0.02     | -0.01    | 0.01     | -0.01    |
|       |                |                | 0.04     | 0.00     | 0.00     | 0.00     | 0.00     |          |
|       |                |                |          |          |          | 0.00     | 0.00     |          |
|       |                |                |          |          |          | -0.01    | -0.01    |          |
| comp. | 1.40           | 0.00           | 1.37     | 0.29     | 0.02     | 0.04     | 0.02     | 0.03     |

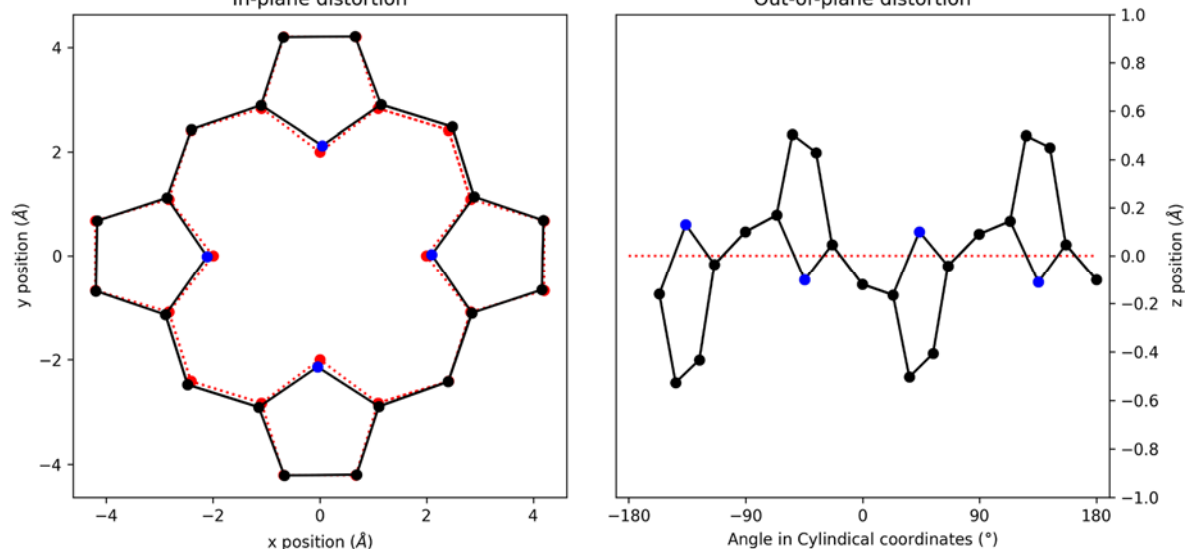

Figure S2.04; (a) out-of-plane and (b) in-plane skeletal plots of the porphyrin core. Porphyrin is represented in black(C) and blue(N), with the reference structure (CuTPP) in red lines.



2.3.5 NSD result generated from H<sub>2</sub>13<sup>1/3</sup>(CH<sub>2</sub>Cl<sub>2</sub>) (5,15-bis(3-pentyl)porphyrin 1/3(DCM))  
 Summary of the NSD (in Å):

| basis | $\Delta_{ip}$ | $\delta_{ip}$ | B <sub>2g</sub> | B <sub>1g</sub> | E <sub>u</sub> (x) | E <sub>u</sub> (y) | A <sub>1g</sub> | A <sub>2g</sub> |
|-------|---------------|---------------|-----------------|-----------------|--------------------|--------------------|-----------------|-----------------|
| min.  | 0.73          | 0.02          | 0.69            | -0.07           | 0.00               | 0.00               | 0.23            | 0.00            |
| ext.  | 0.74          | 0.01          | 0.69            | -0.07           | 0.00               | 0.00               | 0.23            | 0.00            |
|       |               |               | 0.11            | -0.06           | 0.00               | 0.00               | -0.02           | 0.00            |
| total | 0.74          | 0.00          | 0.69            | -0.07           | 0.00               | 0.00               | 0.24            | 0.00            |
|       |               |               | 0.11            | -0.06           | 0.00               | 0.00               | -0.02           | 0.00            |
|       |               |               | 0.01            | -0.04           | 0.00               | 0.00               | 0.06            | 0.00            |
|       |               |               | -0.01           | 0.00            | 0.00               | 0.00               | -0.01           | 0.00            |
|       |               |               | 0.01            | 0.00            | 0.00               | 0.00               | 0.01            | 0.00            |
|       |               |               | 0.01            | -0.01           | 0.00               | 0.00               | 0.02            |                 |
|       |               |               |                 |                 | 0.00               | 0.00               |                 |                 |
|       |               |               |                 |                 | 0.00               | 0.00               |                 |                 |
|       |               |               |                 |                 | 0.00               | 0.00               |                 |                 |
|       |               |               |                 |                 | 0.00               | 0.00               |                 |                 |
|       |               |               |                 |                 | 0.00               | 0.00               |                 |                 |
| comp. | 0.74          | 0.00          | 0.70            | 0.10            | 0.00               | 0.00               | 0.25            | 0.01            |

  

| basis | $\Delta_{oop}$ | $\delta_{oop}$ | B <sub>2u</sub> | B <sub>1u</sub> | A <sub>2u</sub> | E <sub>g</sub> (x) | E <sub>g</sub> (y) | A <sub>1u</sub> |
|-------|----------------|----------------|-----------------|-----------------|-----------------|--------------------|--------------------|-----------------|
| min.  | 0.02           | 0.00           | 0.00            | 0.00            | 0.00            | -0.02              | 0.00               | 0.00            |
| ext.  | 0.04           | 0.00           | 0.00            | 0.00            | 0.00            | -0.02              | 0.00               | 0.00            |
|       |                |                | 0.00            | 0.00            | 0.00            | 0.03               | 0.02               | 0.00            |
| total | 0.04           | 0.00           | 0.00            | 0.00            | 0.00            | -0.02              | 0.00               | 0.00            |
|       |                |                | 0.00            | 0.00            | 0.00            | 0.03               | 0.02               | 0.00            |
|       |                |                | 0.00            | 0.00            | 0.00            | 0.01               | 0.00               |                 |
|       |                |                |                 |                 |                 | 0.00               | 0.00               |                 |
|       |                |                |                 |                 |                 | 0.00               | 0.00               |                 |
| comp. | 0.04           | 0.00           | 0.00            | 0.00            | 0.00            | 0.04               | 0.02               | 0.00            |

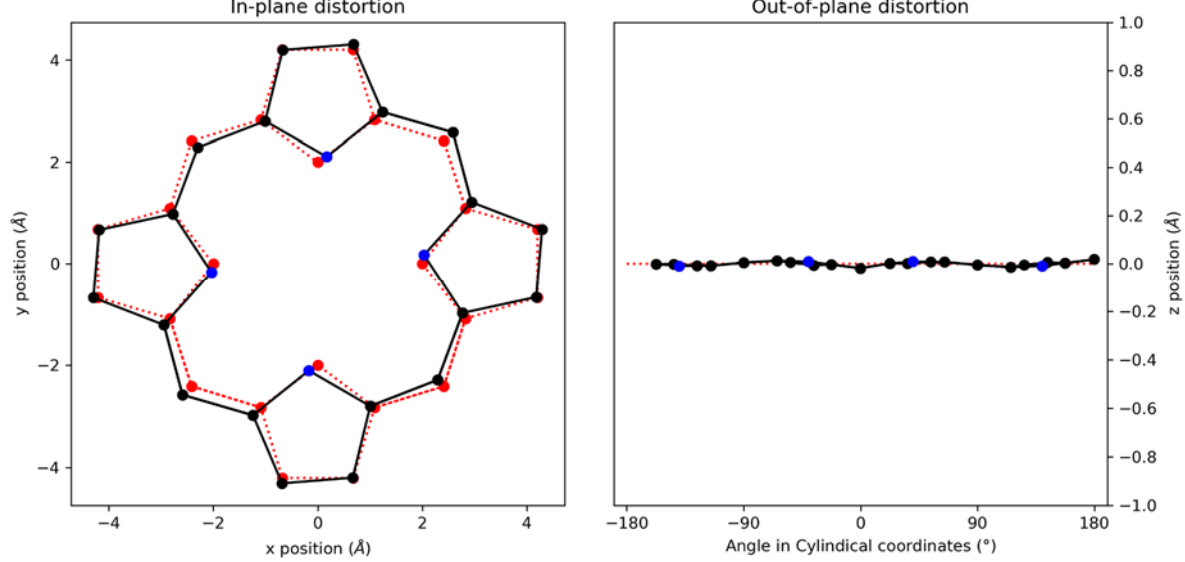

Figure S2.05; (a) out-of-plane and (b) in-plane skeletal plots of the porphyrin core. Porphyrin is represented in black(C) and blue(N), with the reference structure (CuTPP) in red lines.

2.3.6 NSD result generated from  $[H_4\mathbf{13}][CF_3CO_2]_2$  (5,15-bis(3-pentyl)porphyrindi-ium bis(trifluoroacetate))

Summary of the NSD (in Å):

| <b>basis</b> | $\Delta_{ip}$ | $\delta_{ip}$ | $B_{2g}$ | $B_{1g}$ | $E_u(x)$ | $E_u(y)$ | $A_{1g}$ | $A_{2g}$ |
|--------------|---------------|---------------|----------|----------|----------|----------|----------|----------|
| min.         | 0.72          | 0.08          | -0.67    | 0.05     | 0.00     | 0.00     | 0.27     | 0.01     |
| ext.         | 0.75          | 0.05          | -0.67    | 0.05     | 0.00     | 0.00     | 0.27     | 0.01     |
|              |               |               | -0.16    | 0.00     | 0.00     | 0.00     | -0.10    | 0.01     |
| total        | 0.78          | 0.00          | -0.67    | 0.05     | 0.00     | 0.00     | 0.28     | 0.01     |
|              |               |               | -0.16    | 0.00     | 0.00     | 0.00     | -0.10    | 0.01     |
|              |               |               | -0.03    | 0.00     | 0.00     | 0.00     | 0.22     | 0.01     |
|              |               |               | -0.02    | 0.00     | 0.00     | 0.00     | -0.02    | 0.00     |
|              |               |               | 0.00     | 0.00     | 0.00     | 0.00     | 0.00     | -0.01    |
|              |               |               | -0.01    | 0.00     | 0.00     | 0.00     | 0.01     |          |
|              |               |               |          |          | 0.00     | 0.00     |          |          |
|              |               |               |          |          | 0.00     | 0.00     |          |          |
|              |               |               |          |          | 0.00     | 0.00     |          |          |
|              |               |               |          |          | 0.00     | 0.00     |          |          |
|              |               |               |          |          | 0.00     | 0.00     |          |          |
| comp.        | 0.78          | 0.00          | 0.69     | 0.05     | 0.00     | 0.00     | 0.37     | 0.02     |

  

| <b>basis</b> | $\Delta_{oop}$ | $\delta_{oop}$ | $B_{2u}$ | $B_{1u}$ | $A_{2u}$ | $E_g(x)$ | $E_g(y)$ | $A_{1u}$ |
|--------------|----------------|----------------|----------|----------|----------|----------|----------|----------|
| min.         | 0.98           | 0.12           | 0.00     | 0.00     | 0.00     | 0.76     | 0.62     | 0.00     |
| ext.         | 1.04           | 0.00           | 0.00     | 0.00     | 0.00     | 0.76     | 0.63     | 0.00     |
|              |                |                | 0.00     | 0.00     | 0.00     | 0.20     | 0.27     | 0.00     |
| total        | 1.05           | 0.00           | 0.00     | 0.00     | 0.00     | 0.76     | 0.63     | 0.00     |
|              |                |                | 0.00     | 0.00     | 0.00     | 0.20     | 0.27     | 0.00     |
|              |                |                | 0.00     | 0.00     | 0.00     | -0.01    | 0.03     |          |
|              |                |                |          |          |          | 0.01     | 0.02     |          |
|              |                |                |          |          |          | 0.04     | 0.04     |          |
| comp.        | 1.05           | 0.00           | 0.00     | 0.00     | 0.00     | 0.79     | 0.69     | 0.00     |

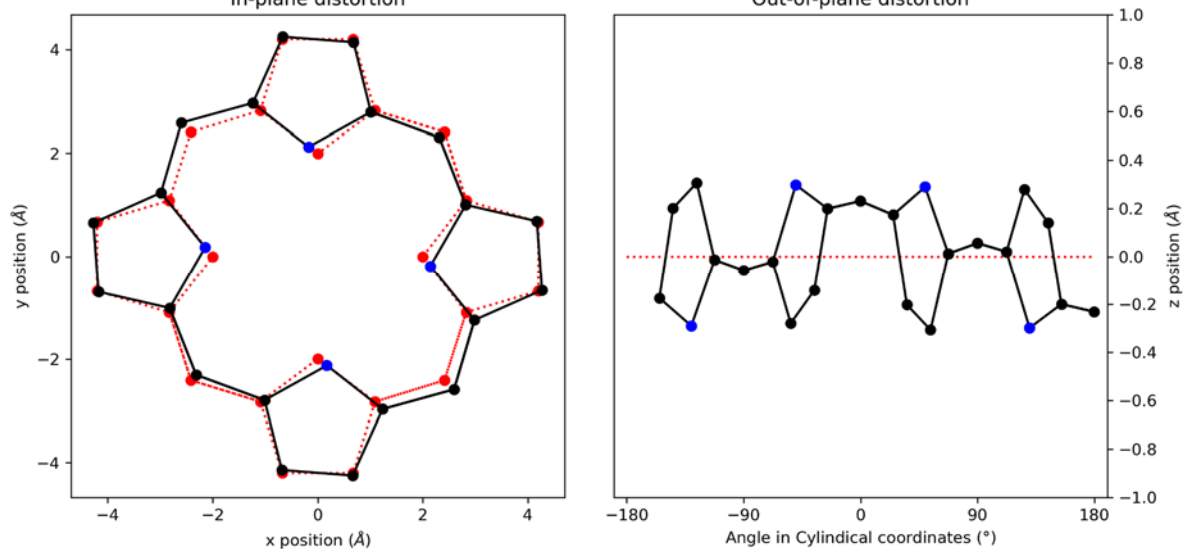

Figure S2.06; (a) out-of-plane and (b) in-plane skeletal plots of the porphyrin core. Porphyrin is represented in black(C) and blue(N), with the reference structure (CuTPP) in red lines.

2.3.7 NSD result generated from [H<sub>4</sub>14][CF<sub>3</sub>CO<sub>2</sub>]<sub>2</sub> (5,15-triphenylporphyrindium bis(trifluoroacetate))

Summary of the NSD (in Å):

| basis | $\Delta_{ip}$ | $\delta_{ip}$ | $B_{2g}$ | $B_{1g}$ | $E_u(x)$ | $E_u(y)$ | $A_{1g}$ | $A_{2g}$ |
|-------|---------------|---------------|----------|----------|----------|----------|----------|----------|
| min.  | 0.22          | 0.14          | -0.19    | -0.03    | 0.00     | -0.01    | 0.11     | 0.01     |
| ext.  | 0.30          | 0.10          | -0.19    | -0.03    | 0.00     | -0.01    | 0.11     | 0.01     |
|       |               |               | -0.03    | -0.01    | -0.07    | 0.01     | -0.18    | 0.02     |
| total | 0.44          | 0.00          | -0.19    | -0.03    | 0.00     | -0.01    | 0.12     | 0.01     |
|       |               |               | -0.03    | -0.01    | -0.07    | 0.01     | -0.17    | 0.02     |
|       |               |               | -0.01    | 0.00     | 0.00     | 0.00     | 0.32     | 0.00     |
|       |               |               | 0.00     | 0.00     | 0.03     | -0.01    | -0.02    | 0.00     |
|       |               |               | -0.01    | 0.00     | 0.04     | -0.01    | 0.00     | 0.00     |
|       |               |               | 0.00     | 0.00     | 0.01     | -0.01    | -0.01    |          |
|       |               |               |          |          | 0.00     | 0.00     |          |          |
|       |               |               |          |          | 0.00     | 0.00     |          |          |
|       |               |               |          |          | -0.01    | 0.00     |          |          |
|       |               |               |          |          | -0.01    | 0.01     |          |          |
|       |               |               |          |          | -0.01    | 0.00     |          |          |
| comp. | 0.44          | 0.00          | 0.19     | 0.04     | 0.09     | 0.03     | 0.38     | 0.02     |

  

| basis | $\Delta_{oop}$ | $\delta_{oop}$ | $B_{2u}$ | $B_{1u}$ | $A_{2u}$ | $E_g(x)$ | $E_g(y)$ | $A_{1u}$ |
|-------|----------------|----------------|----------|----------|----------|----------|----------|----------|
| min.  | 1.76           | 0.39           | 1.75     | 0.10     | 0.00     | 0.04     | -0.16    | 0.02     |
| ext.  | 1.86           | 0.00           | 1.74     | 0.10     | 0.00     | 0.05     | -0.16    | 0.02     |
|       |                |                | -0.62    | 0.01     | -0.03    | 0.01     | 0.00     | -0.01    |
| total | 1.86           | 0.00           | 1.74     | 0.10     | 0.00     | 0.05     | -0.16    | 0.02     |
|       |                |                | -0.62    | 0.01     | -0.03    | 0.01     | 0.00     | -0.01    |
|       |                |                | -0.05    | 0.00     | 0.01     | 0.01     | 0.02     |          |
|       |                |                |          |          |          | 0.00     | 0.01     |          |
|       |                |                |          |          |          | 0.00     | -0.02    |          |
| comp. | 1.86           | 0.00           | 1.85     | 0.11     | 0.03     | 0.05     | 0.16     | 0.02     |

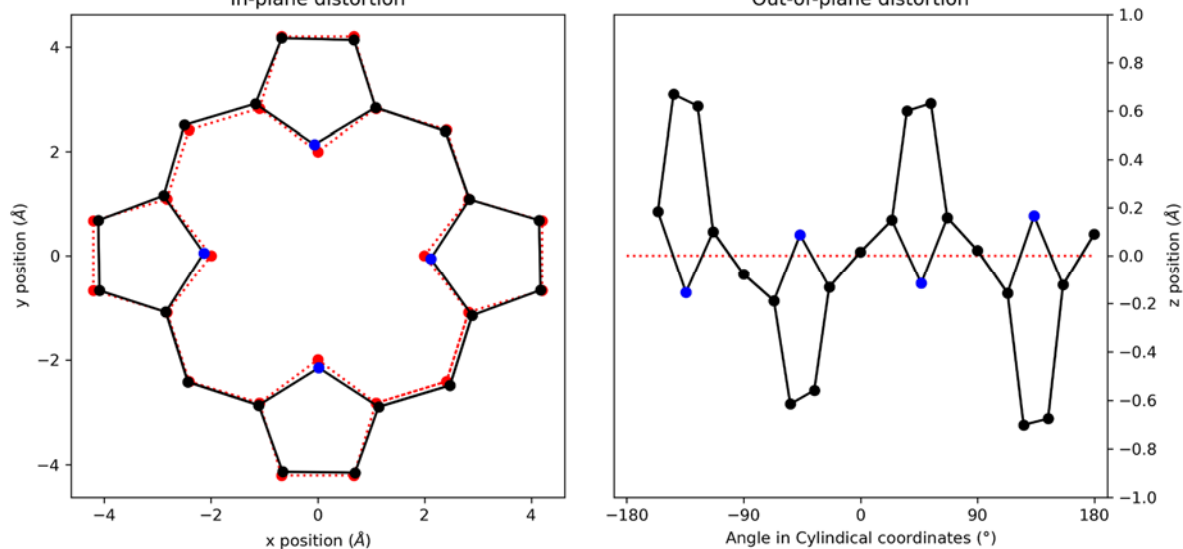

Figure S2.07; (a) out-of-plane and (b) in-plane skeletal plots of the porphyrin core. Porphyrin is represented in black(C) and blue(N), with the reference structure (CuTPP) in red lines.

### 2.3.8 NSD result generated from H<sub>2</sub>15 (5,15-bis(4-butoxyphenyl)porphyrin)

Summary of the NSD (in Å):

| basis | $\Delta_{ip}$ | $\delta_{ip}$ | $B_{2g}$ | $B_{1g}$ | $E_u(x)$ | $E_u(y)$ | $A_{1g}$ | $A_{2g}$ |
|-------|---------------|---------------|----------|----------|----------|----------|----------|----------|
| min.  | 0.39          | 0.01          | -0.33    | 0.04     | 0.00     | 0.00     | 0.21     | 0.01     |
| ext.  | 0.39          | 0.00          | -0.33    | 0.04     | 0.00     | 0.00     | 0.21     | 0.01     |
|       |               |               | -0.04    | 0.04     | 0.00     | 0.00     | -0.02    | 0.00     |
| total | 0.40          | 0.00          | -0.33    | 0.04     | 0.00     | 0.00     | 0.21     | 0.01     |
|       |               |               | -0.04    | 0.04     | 0.00     | 0.00     | -0.02    | 0.00     |
|       |               |               | -0.01    | 0.03     | 0.00     | 0.00     | 0.04     | 0.00     |
|       |               |               | 0.00     | 0.00     | 0.00     | 0.00     | 0.01     | 0.00     |
|       |               |               | 0.00     | 0.00     | 0.00     | 0.00     | 0.02     | 0.00     |
|       |               |               | -0.01    | 0.01     | 0.00     | 0.00     | 0.01     |          |
|       |               |               |          |          | 0.00     | 0.00     |          |          |
|       |               |               |          |          | 0.00     | 0.00     |          |          |
|       |               |               |          |          | 0.00     | 0.00     |          |          |
|       |               |               |          |          | 0.00     | 0.00     |          |          |
|       |               |               |          |          | 0.00     | 0.00     |          |          |
| comp. | 0.40          | 0.00          | 0.33     | 0.07     | 0.00     | 0.00     | 0.22     | 0.01     |

  

| basis | $\Delta_{oop}$ | $\delta_{oop}$ | $B_{2u}$ | $B_{1u}$ | $A_{2u}$ | $E_g(x)$ | $E_g(y)$ | $A_{1u}$ |
|-------|----------------|----------------|----------|----------|----------|----------|----------|----------|
| min.  | 0.06           | 0.00           | 0.00     | 0.00     | 0.00     | -0.06    | -0.02    | 0.00     |
| ext.  | 0.06           | 0.00           | 0.00     | 0.00     | 0.00     | -0.06    | -0.02    | 0.00     |
|       |                |                | 0.00     | 0.00     | 0.00     | 0.00     | -0.01    | 0.00     |
| total | 0.06           | 0.00           | 0.00     | 0.00     | 0.00     | -0.06    | -0.02    | 0.00     |
|       |                |                | 0.00     | 0.00     | 0.00     | 0.00     | -0.01    | 0.00     |
|       |                |                | 0.00     | 0.00     | 0.00     | 0.00     | 0.01     |          |
|       |                |                |          |          |          | 0.01     | 0.01     |          |
|       |                |                |          |          |          | 0.00     | 0.00     |          |
| comp. | 0.06           | 0.00           | 0.00     | 0.00     | 0.00     | 0.06     | 0.02     | 0.00     |

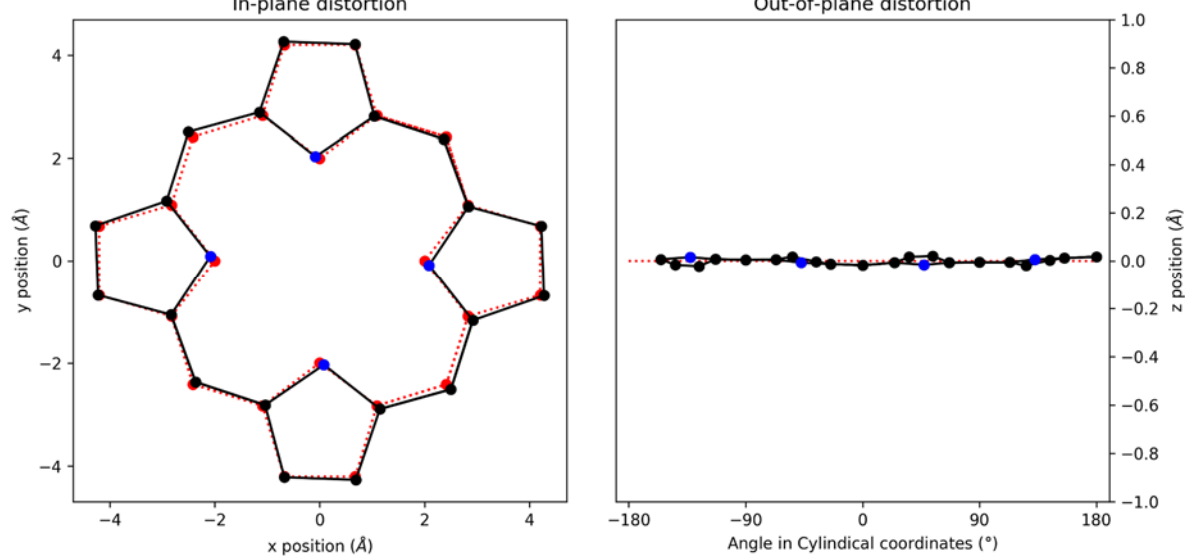

Figure S2.08; (a) out-of-plane and (b) in-plane skeletal plots of the porphyrin core. Porphyrin is represented in black(C) and blue(N), with the reference structure (CuTPP) in red lines.

2.3.9 NSD result generated from [H<sub>4</sub>17][CF<sub>3</sub>CO<sub>2</sub>]<sub>2</sub>·2CF<sub>3</sub>CO<sub>2</sub>H (5,15-bis(4-methoxyphenyl)porphyrindi-ium bis(trifluoroacetate) bis(trifluoroacetic acid solvate))

Summary of the NSD (in Å):

| basis | $\Delta_{ip}$ | $\delta_{ip}$ | $B_{2g}$ | $B_{1g}$ | $E_u(x)$ | $E_u(y)$ | $A_{1g}$ | $A_{2g}$ |
|-------|---------------|---------------|----------|----------|----------|----------|----------|----------|
| min.  | 0.33          | 0.06          | -0.19    | -0.03    | 0.01     | -0.02    | 0.27     | 0.01     |
| ext.  | 0.36          | 0.04          | -0.19    | -0.03    | 0.01     | -0.02    | 0.27     | 0.01     |
|       |               |               | -0.04    | 0.00     | 0.01     | -0.03    | -0.11    | 0.02     |
| total | 0.42          | 0.00          | -0.19    | -0.03    | 0.00     | -0.02    | 0.28     | 0.01     |
|       |               |               | -0.04    | 0.00     | 0.01     | -0.03    | -0.11    | 0.02     |
|       |               |               | -0.02    | 0.02     | 0.01     | -0.01    | 0.21     | 0.00     |
|       |               |               | 0.01     | 0.00     | -0.01    | 0.01     | 0.00     | 0.00     |
|       |               |               | 0.00     | 0.00     | -0.02    | 0.03     | 0.00     | 0.00     |
|       |               |               | -0.01    | -0.01    | 0.00     | 0.00     | -0.01    |          |
|       |               |               |          |          | 0.00     | 0.00     |          |          |
|       |               |               |          |          | 0.00     | 0.00     |          |          |
|       |               |               |          |          | 0.00     | 0.00     |          |          |
|       |               |               |          |          | 0.00     | 0.00     |          |          |
|       |               |               |          |          | 0.00     | 0.00     |          |          |
| comp. | 0.42          | 0.00          | 0.20     | 0.04     | 0.03     | 0.05     | 0.37     | 0.02     |

| basis | $\Delta_{oop}$ | $\delta_{oop}$ | $B_{2u}$ | $B_{1u}$ | $A_{2u}$ | $E_g(x)$ | $E_g(y)$ | $A_{1u}$ |
|-------|----------------|----------------|----------|----------|----------|----------|----------|----------|
| min.  | 1.19           | 0.24           | -1.16    | -0.15    | -0.10    | 0.16     | -0.11    | -0.02    |
| ext.  | 1.28           | 0.00           | -1.16    | -0.15    | -0.10    | 0.16     | -0.11    | -0.02    |
|       |                |                | 0.49     | 0.00     | 0.01     | 0.02     | 0.03     | 0.01     |
| total | 1.28           | 0.00           | -1.15    | -0.15    | -0.10    | 0.16     | -0.11    | -0.02    |
|       |                |                | 0.49     | 0.00     | 0.01     | 0.02     | 0.03     | 0.01     |
|       |                |                | 0.03     | 0.00     | 0.00     | 0.00     | 0.01     |          |
|       |                |                |          |          |          | 0.00     | 0.00     |          |
|       |                |                |          |          |          | 0.02     | -0.01    |          |
| comp. | 1.28           | 0.00           | 1.26     | 0.15     | 0.10     | 0.16     | 0.12     | 0.02     |

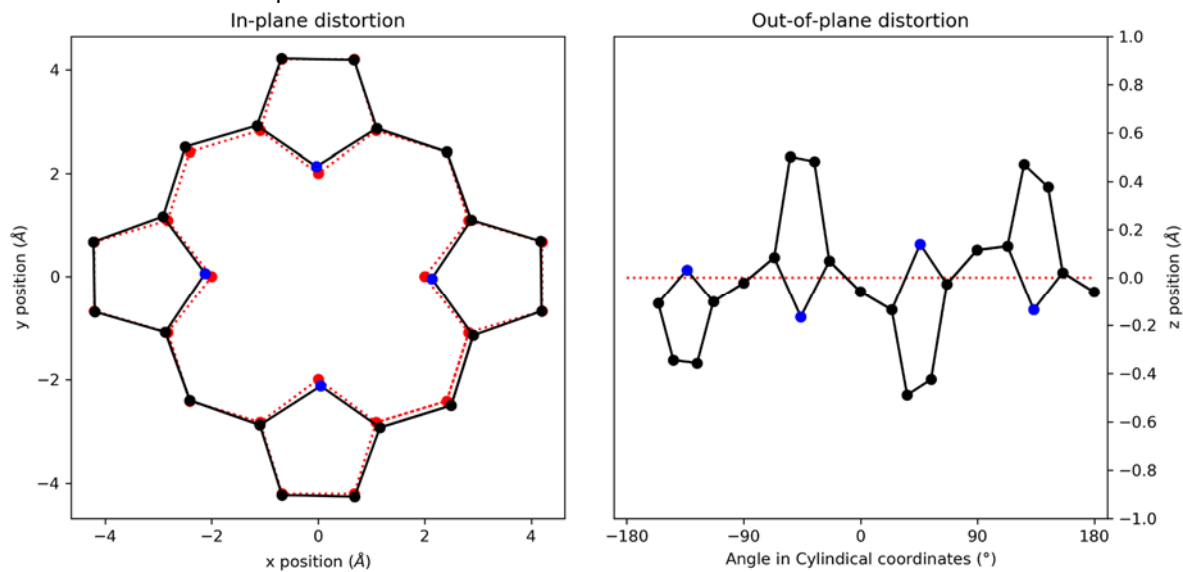

Figure S2.09; (a) out-of-plane and (b) in-plane skeletal plots of the porphyrin core. Porphyrin is represented in black(C) and blue(N), with the reference structure (CuTPP) in red lines.

2.3.10 NSD result generated from [H<sub>4</sub>18][ClO<sub>4</sub>]<sub>2</sub> (5,15-bis(4-bromophenyl)porphyrindi-ium bis(perchlorate)) (HE)

Summary of the NSD (in Å):

| basis | $\Delta_{ip}$ | $\delta_{ip}$ | $B_{2g}$ | $B_{1g}$ | $E_u(x)$ | $E_u(y)$ | $A_{1g}$ | $A_{2g}$ |
|-------|---------------|---------------|----------|----------|----------|----------|----------|----------|
| min.  | 0.33          | 0.16          | 0.31     | 0.09     | 0.00     | -0.03    | 0.06     | -0.02    |
| ext.  | 0.38          | 0.12          | 0.31     | 0.09     | 0.00     | -0.03    | 0.06     | -0.02    |
|       |               |               | 0.03     | 0.00     | 0.00     | -0.01    | -0.18    | -0.07    |
| total | 0.52          | 0.00          | 0.31     | 0.09     | 0.00     | -0.03    | 0.07     | -0.02    |
|       |               |               | 0.03     | 0.00     | 0.00     | -0.01    | -0.18    | -0.07    |
|       |               |               | 0.02     | -0.08    | 0.01     | 0.00     | 0.33     | 0.00     |
|       |               |               | -0.02    | -0.01    | -0.01    | 0.01     | -0.02    | 0.00     |
|       |               |               | 0.01     | 0.01     | 0.00     | 0.01     | -0.02    | 0.00     |
|       |               |               | 0.01     | 0.02     | 0.00     | 0.00     | 0.00     |          |
|       |               |               |          |          | 0.01     | 0.00     |          |          |
|       |               |               |          |          | 0.00     | 0.00     |          |          |
|       |               |               |          |          | 0.00     | 0.00     |          |          |
|       |               |               |          |          | 0.00     | 0.00     |          |          |
|       |               |               |          |          | 0.00     | 0.00     |          |          |
|       |               |               |          |          | 0.00     | 0.00     |          |          |
| comp. | 0.52          | 0.00          | 0.32     | 0.12     | 0.01     | 0.03     | 0.38     | 0.07     |

  

| basis | $\Delta_{oop}$ | $\delta_{oop}$ | $B_{2u}$ | $B_{1u}$ | $A_{2u}$ | $E_g(x)$ | $E_g(y)$ | $A_{1u}$ |
|-------|----------------|----------------|----------|----------|----------|----------|----------|----------|
| min.  | 1.92           | 0.26           | 1.87     | -0.33    | -0.23    | -0.05    | 0.04     | -0.05    |
| ext.  | 1.97           | 0.00           | 1.86     | -0.33    | -0.23    | -0.05    | 0.04     | -0.05    |
|       |                |                | -0.50    | 0.00     | 0.01     | 0.00     | -0.01    | 0.02     |
| total | 1.97           | 0.00           | 1.86     | -0.33    | -0.23    | -0.05    | 0.04     | -0.05    |
|       |                |                | -0.51    | 0.00     | 0.01     | 0.00     | -0.01    | 0.02     |
|       |                |                | -0.04    | 0.00     | -0.01    | 0.00     | 0.00     |          |
|       |                |                |          |          |          | 0.00     | 0.00     |          |
|       |                |                |          |          |          | 0.01     | 0.00     |          |
| comp. | 1.97           | 0.00           | 1.93     | 0.33     | 0.23     | 0.05     | 0.04     | 0.06     |

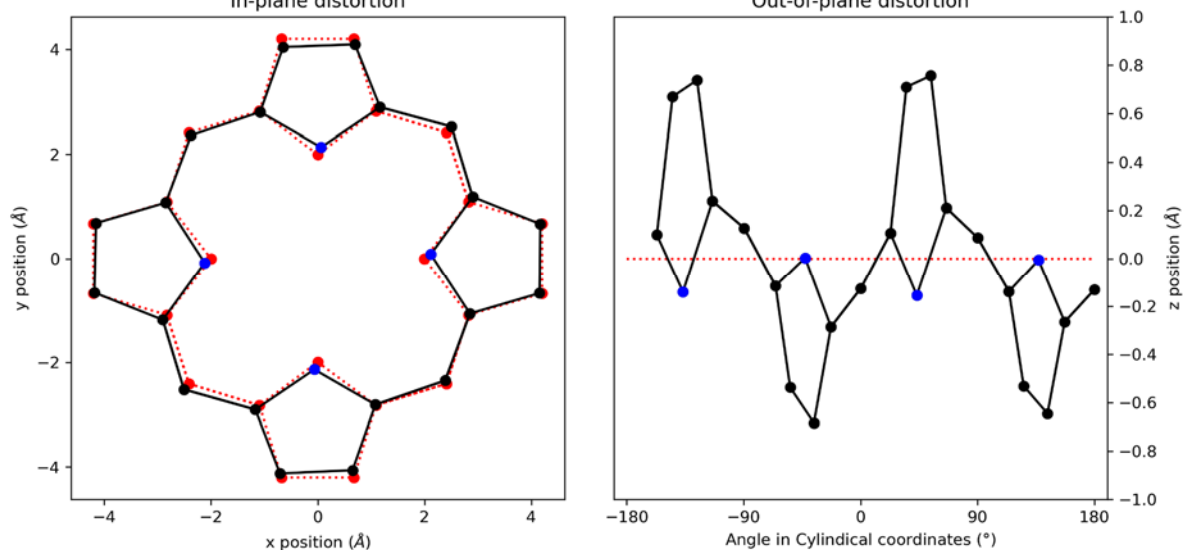

Figure S2.10; (a) out-of-plane and (b) in-plane skeletal plots of the porphyrin core. Porphyrin is represented in black(C) and blue(N), with the reference structure (CuTPP) in red lines.

2.3.11 NSD result generated from [H<sub>4</sub>18][ClO<sub>4</sub>]<sub>2</sub> (5,15-bis(4-bromophenyl)porphyrindi-ium bis(perchlorate)) (MS)

Summary of the NSD (in Å):

| basis | $\Delta_{ip}$ | $\delta_{ip}$ | $B_{2g}$ | $B_{1g}$ | $E_u(x)$ | $E_u(y)$ | $A_{1g}$ | $A_{2g}$ |
|-------|---------------|---------------|----------|----------|----------|----------|----------|----------|
| min.  | 0.33          | 0.14          | -0.31    | 0.09     | 0.01     | 0.03     | 0.06     | 0.01     |
| ext.  | 0.38          | 0.11          | -0.31    | 0.09     | 0.01     | 0.03     | 0.06     | 0.02     |
|       |               |               | -0.03    | 0.00     | 0.00     | 0.00     | -0.17    | 0.07     |
| total | 0.50          | 0.00          | -0.31    | 0.09     | 0.01     | 0.03     | 0.08     | 0.02     |
|       |               |               | -0.03    | 0.00     | 0.00     | 0.00     | -0.17    | 0.07     |
|       |               |               | -0.02    | -0.08    | 0.01     | 0.00     | 0.31     | 0.01     |
|       |               |               | 0.01     | 0.00     | -0.01    | -0.01    | -0.02    | 0.01     |
|       |               |               | -0.01    | 0.00     | 0.00     | -0.01    | -0.01    | 0.01     |
|       |               |               | -0.01    | 0.01     | 0.00     | 0.00     | -0.01    |          |
|       |               |               |          |          | 0.00     | 0.00     |          |          |
|       |               |               |          |          | 0.00     | 0.00     |          |          |
|       |               |               |          |          | 0.00     | 0.00     |          |          |
|       |               |               |          |          | 0.00     | 0.00     |          |          |
|       |               |               |          |          | 0.00     | 0.00     |          |          |
| comp. | 0.50          | 0.00          | 0.31     | 0.12     | 0.01     | 0.03     | 0.37     | 0.07     |

  

| basis | $\Delta_{oop}$ | $\delta_{oop}$ | $B_{2u}$ | $B_{1u}$ | $A_{2u}$ | $E_g(x)$ | $E_g(y)$ | $A_{1u}$ |
|-------|----------------|----------------|----------|----------|----------|----------|----------|----------|
| min.  | 1.93           | 0.27           | -1.88    | -0.33    | 0.23     | -0.05    | -0.04    | -0.05    |
| ext.  | 1.98           | 0.00           | -1.87    | -0.33    | 0.23     | -0.05    | -0.04    | -0.05    |
|       |                |                | 0.52     | 0.00     | -0.01    | 0.00     | 0.01     | 0.02     |
| total | 1.98           | 0.00           | -1.87    | -0.33    | 0.23     | -0.05    | -0.04    | -0.05    |
|       |                |                | 0.52     | 0.00     | -0.01    | 0.00     | 0.01     | 0.02     |
|       |                |                | 0.04     | -0.01    | 0.01     | 0.00     | 0.00     |          |
|       |                |                |          |          |          | 0.00     | 0.01     |          |
|       |                |                |          |          |          | 0.01     | 0.00     |          |
| comp. | 1.98           | 0.00           | 1.94     | 0.33     | 0.23     | 0.05     | 0.04     | 0.06     |

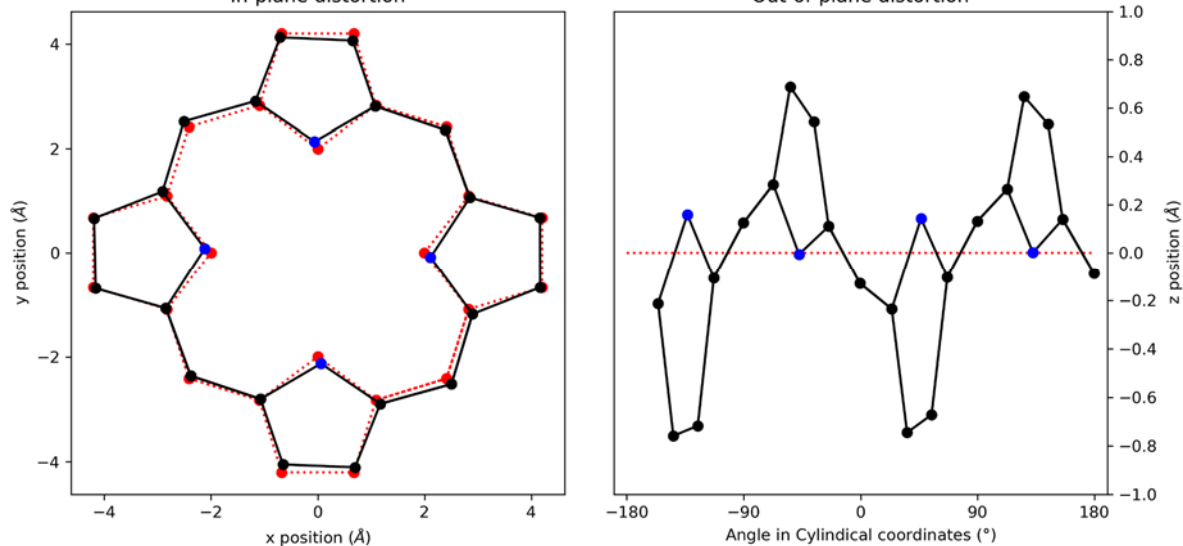

Figure S2.11; (a) out-of-plane and (b) in-plane skeletal plots of the porphyrin core. Porphyrin is represented in black(C) and blue(N), with the reference structure (CuTPP) in red lines.

2.3.12 NSD result generated from  $[H_4\mathbf{18}][CF_3CO_2]_2 \cdot 2CF_3CO_2H$  (5,15-bis(4-methylthiophenyl)porphyrindi-ium bis(trifluoroacetate) bis(trifluoroacetic acid) solvate) (HE)

Summary of the NSD (in Å):

| basis | $\Delta_{ip}$ | $\delta_{ip}$ | $B_{2g}$ | $B_{1g}$ | $E_u(x)$ | $E_u(y)$ | $A_{1g}$ | $A_{2g}$ |
|-------|---------------|---------------|----------|----------|----------|----------|----------|----------|
| min.  | 0.28          | 0.07          | 0.20     | 0.01     | 0.02     | -0.01    | 0.20     | 0.01     |
| ext.  | 0.31          | 0.06          | 0.20     | 0.01     | 0.02     | -0.01    | 0.20     | 0.01     |
|       |               |               | 0.04     | 0.00     | 0.02     | 0.01     | -0.12    | 0.03     |
| total | 0.40          | 0.00          | 0.20     | 0.01     | 0.01     | -0.01    | 0.21     | 0.01     |
|       |               |               | 0.04     | 0.00     | 0.02     | 0.01     | -0.12    | 0.03     |
|       |               |               | 0.01     | -0.01    | 0.01     | 0.00     | 0.23     | 0.01     |
|       |               |               | -0.01    | 0.00     | -0.01    | -0.02    | 0.00     | 0.00     |
|       |               |               | 0.01     | 0.00     | -0.03    | -0.03    | -0.01    | 0.00     |
|       |               |               | 0.01     | 0.00     | -0.01    | 0.00     | 0.00     |          |
|       |               |               |          |          | 0.00     | 0.00     |          |          |
|       |               |               |          |          | 0.00     | 0.00     |          |          |
|       |               |               |          |          | 0.00     | 0.00     |          |          |
|       |               |               |          |          | 0.00     | 0.00     |          |          |
| comp. | 0.40          | 0.00          | 0.20     | 0.02     | 0.04     | 0.04     | 0.33     | 0.03     |

| basis | $\Delta_{oop}$ | $\delta_{oop}$ | $B_{2u}$ | $B_{1u}$ | $A_{2u}$ | $E_g(x)$ | $E_g(y)$ | $A_{1u}$ |
|-------|----------------|----------------|----------|----------|----------|----------|----------|----------|
| min.  | 1.36           | 0.26           | -1.33    | -0.18    | 0.04     | -0.14    | -0.12    | 0.01     |
| ext.  | 1.44           | 0.00           | -1.32    | -0.18    | 0.04     | -0.14    | -0.12    | 0.01     |
|       |                |                | 0.51     | 0.00     | -0.01    | 0.01     | -0.02    | -0.01    |
| total | 1.44           | 0.00           | -1.32    | -0.18    | 0.04     | -0.14    | -0.12    | 0.01     |
|       |                |                | 0.51     | 0.00     | -0.01    | 0.01     | -0.02    | -0.01    |
|       |                |                | 0.04     | 0.00     | 0.00     | 0.00     | 0.00     |          |
|       |                |                |          |          |          | 0.00     | 0.00     |          |
|       |                |                |          |          |          | -0.01    | -0.01    |          |
| comp. | 1.44           | 0.00           | 1.42     | 0.18     | 0.04     | 0.15     | 0.12     | 0.02     |

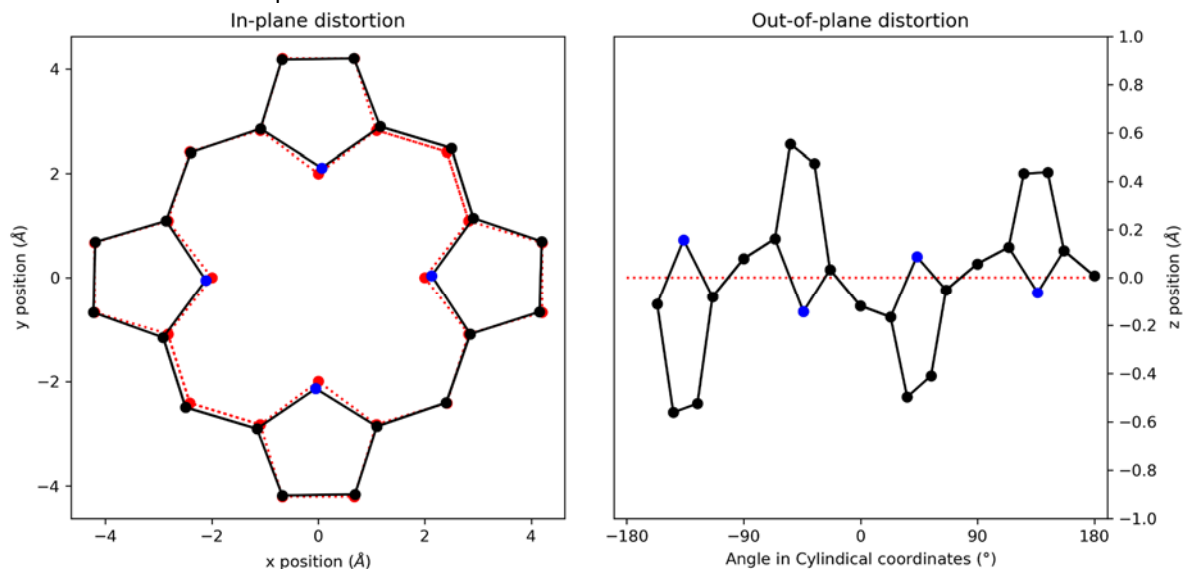

Figure S2.12; (a) out-of-plane and (b) in-plane skeletal plots of the porphyrin core. Porphyrin is represented in black(C) and blue(N), with the reference structure (CuTPP) in red lines.



2.3.13 NSD result generated from [H<sub>4</sub>18][CF<sub>3</sub>CO<sub>2</sub>]<sub>2</sub>·2CF<sub>3</sub>CO<sub>2</sub>H (5,15-bis(4-methylthiophenyl)porphyrindi-ium bis(trifluoroacetate) bis(trifluoroacetic acid) solvate) (MS)

Summary of the NSD (in Å):

| <b>basis</b> | $\Delta_{ip}$ | $\delta_{ip}$ | <b>B<sub>2g</sub></b> | <b>B<sub>1g</sub></b> | <b>E<sub>u</sub>(x)</b> | <b>E<sub>u</sub>(y)</b> | <b>A<sub>1g</sub></b> | <b>A<sub>2g</sub></b> |
|--------------|---------------|---------------|-----------------------|-----------------------|-------------------------|-------------------------|-----------------------|-----------------------|
| min.         | 0.28          | 0.07          | 0.20                  | 0.02                  | 0.01                    | -0.01                   | 0.20                  | 0.01                  |
| ext.         | 0.31          | 0.06          | 0.20                  | 0.02                  | 0.01                    | -0.01                   | 0.20                  | 0.01                  |
|              |               |               | 0.04                  | 0.00                  | 0.01                    | 0.01                    | -0.12                 | 0.03                  |
| total        | 0.40          | 0.00          | 0.20                  | 0.02                  | 0.01                    | -0.01                   | 0.21                  | 0.01                  |
|              |               |               | 0.04                  | 0.00                  | 0.01                    | 0.01                    | -0.12                 | 0.03                  |
|              |               |               | 0.01                  | -0.01                 | 0.01                    | 0.00                    | 0.23                  | 0.01                  |
|              |               |               | -0.01                 | 0.00                  | -0.01                   | -0.02                   | 0.00                  | 0.00                  |
|              |               |               | 0.01                  | 0.00                  | -0.03                   | -0.03                   | -0.01                 | 0.00                  |
|              |               |               | 0.01                  | 0.00                  | -0.01                   | 0.00                    | 0.00                  |                       |
|              |               |               |                       |                       | 0.00                    | 0.00                    |                       |                       |
|              |               |               |                       |                       | 0.00                    | 0.00                    |                       |                       |
|              |               |               |                       |                       | 0.00                    | 0.00                    |                       |                       |
|              |               |               |                       |                       | 0.00                    | 0.00                    |                       |                       |
|              |               |               |                       |                       | 0.00                    | 0.00                    |                       |                       |
| comp.        | 0.40          | 0.00          | 0.20                  | 0.02                  | 0.04                    | 0.04                    | 0.33                  | 0.03                  |

  

| <b>basis</b> | $\Delta_{oop}$ | $\delta_{oop}$ | <b>B<sub>2u</sub></b> | <b>B<sub>1u</sub></b> | <b>A<sub>2u</sub></b> | <b>E<sub>g</sub>(x)</b> | <b>E<sub>g</sub>(y)</b> | <b>A<sub>1u</sub></b> |
|--------------|----------------|----------------|-----------------------|-----------------------|-----------------------|-------------------------|-------------------------|-----------------------|
| min.         | 1.36           | 0.26           | -1.33                 | -0.17                 | 0.04                  | -0.14                   | -0.12                   | 0.01                  |
| ext.         | 1.44           | 0.00           | -1.32                 | -0.17                 | 0.04                  | -0.14                   | -0.12                   | 0.01                  |
|              |                |                | 0.51                  | 0.00                  | -0.01                 | 0.01                    | -0.02                   | -0.01                 |
| total        | 1.44           | 0.00           | -1.32                 | -0.17                 | 0.04                  | -0.14                   | -0.12                   | 0.01                  |
|              |                |                | 0.51                  | 0.00                  | -0.01                 | 0.01                    | -0.02                   | -0.01                 |
|              |                |                | 0.04                  | 0.00                  | 0.00                  | 0.00                    | 0.00                    |                       |
|              |                |                |                       |                       |                       | 0.00                    | 0.00                    |                       |
|              |                |                |                       |                       |                       | -0.01                   | -0.01                   |                       |
| comp.        | 1.44           | 0.00           | 1.42                  | 0.17                  | 0.04                  | 0.15                    | 0.12                    | 0.02                  |

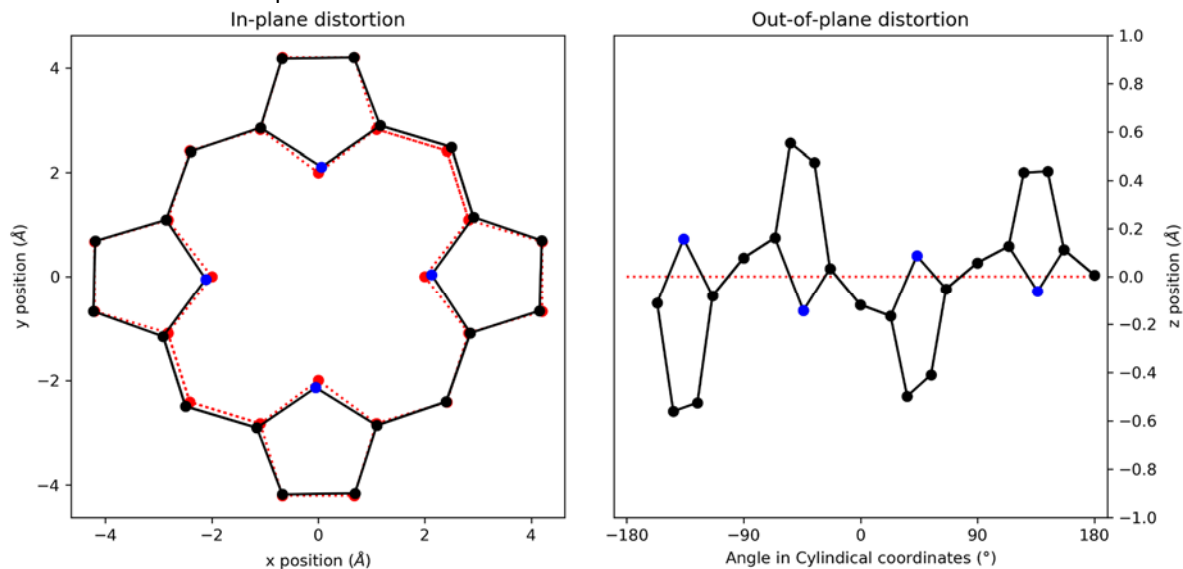

Figure S2.13; (a) out-of-plane and (b) in-plane skeletal plots of the porphyrin core. Porphyrin is represented in black(C) and blue(N), with the reference structure (CuTPP) in red lines.

### 2.3.14 NSD result generated from H<sub>2</sub>16 (5,15-diphenyl-10-(thiophen-3-yl)porphyrin)

Summary of the NSD (in Å):

| basis | $\Delta_{ip}$ | $\delta_{ip}$ | $B_{2g}$ | $B_{1g}$ | $E_u(x)$ | $E_u(y)$ | $A_{1g}$ | $A_{2g}$ |
|-------|---------------|---------------|----------|----------|----------|----------|----------|----------|
| min.  | 0.30          | 0.01          | -0.22    | -0.06    | 0.00     | 0.00     | 0.20     | 0.00     |
| ext.  | 0.30          | 0.00          | -0.22    | -0.07    | 0.00     | 0.00     | 0.20     | 0.00     |
|       |               |               | -0.04    | -0.04    | 0.02     | -0.01    | -0.01    | -0.01    |
| total | 0.31          | 0.00          | -0.22    | -0.07    | 0.00     | 0.00     | 0.20     | 0.00     |
|       |               |               | -0.04    | -0.04    | 0.02     | -0.01    | -0.01    | -0.01    |
|       |               |               | 0.00     | -0.03    | 0.00     | 0.00     | 0.05     | 0.00     |
|       |               |               | 0.01     | -0.01    | -0.01    | 0.00     | -0.01    | 0.00     |
|       |               |               | 0.00     | 0.00     | 0.00     | 0.00     | 0.01     | 0.00     |
|       |               |               | 0.00     | -0.01    | 0.00     | 0.01     | 0.02     |          |
|       |               |               |          |          | 0.01     | -0.01    |          |          |
|       |               |               |          |          | 0.00     | 0.01     |          |          |
|       |               |               |          |          | 0.00     | 0.01     |          |          |
|       |               |               |          |          | 0.00     | 0.00     |          |          |
|       |               |               |          |          | 0.00     | 0.00     |          |          |
| comp. | 0.31          | 0.00          | 0.22     | 0.08     | 0.03     | 0.02     | 0.21     | 0.01     |

  

| basis | $\Delta_{oop}$ | $\delta_{oop}$ | $B_{2u}$ | $B_{1u}$ | $A_{2u}$ | $E_g(x)$ | $E_g(y)$ | $A_{1u}$ |
|-------|----------------|----------------|----------|----------|----------|----------|----------|----------|
| min.  | 0.43           | 0.01           | -0.10    | 0.38     | -0.11    | -0.03    | 0.14     | 0.00     |
| ext.  | 0.44           | 0.00           | -0.09    | 0.38     | -0.11    | -0.03    | 0.14     | 0.00     |
|       |                |                | 0.06     | 0.01     | -0.02    | -0.04    | 0.01     | 0.01     |
| total | 0.44           | 0.00           | -0.09    | 0.38     | -0.11    | -0.03    | 0.14     | 0.00     |
|       |                |                | 0.06     | 0.01     | -0.02    | -0.04    | 0.01     | 0.01     |
|       |                |                | -0.01    | 0.00     | 0.00     | -0.01    | -0.01    |          |
|       |                |                |          |          |          | -0.01    | -0.01    |          |
|       |                |                |          |          |          | 0.00     | 0.01     |          |
| comp. | 0.44           | 0.00           | 0.11     | 0.38     | 0.11     | 0.05     | 0.14     | 0.01     |

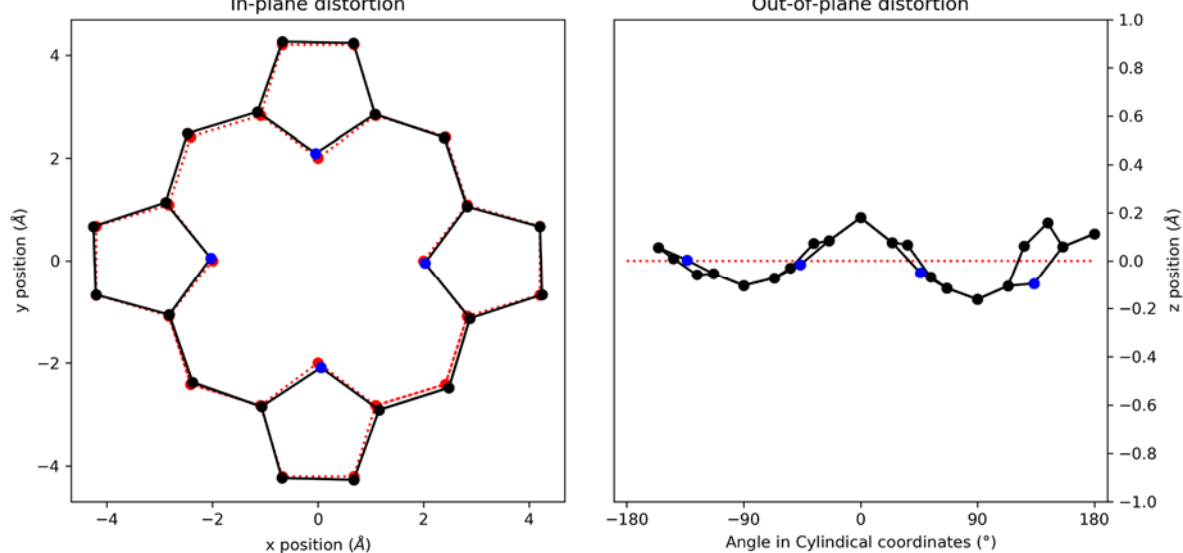

Figure S2.14; (a) out-of-plane and (b) in-plane skeletal plots of the porphyrin core. Porphyrin is represented in black(C) and blue(N), with the reference structure (CuTPP) in red lines.

2.3.15 NSD result generated from [H<sub>4</sub>20][ClO<sub>4</sub>]<sub>2</sub> (5-bromo-10,20-diphenylporphyrindi-ium diperchlorate)

Summary of the NSD (in Å):

| basis | $\Delta_{ip}$ | $\delta_{ip}$ | $B_{2g}$ | $B_{1g}$ | $E_u(x)$ | $E_u(y)$ | $A_{1g}$ | $A_{2g}$ |
|-------|---------------|---------------|----------|----------|----------|----------|----------|----------|
| min.  | 0.13          | 0.21          | -0.11    | 0.02     | 0.01     | -0.03    | -0.04    | 0.02     |
| ext.  | 0.26          | 0.16          | -0.11    | 0.02     | 0.01     | -0.03    | -0.04    | 0.02     |
|       |               |               | -0.02    | 0.00     | 0.01     | -0.01    | -0.22    | 0.06     |
| total | 0.47          | 0.00          | -0.11    | 0.02     | 0.01     | -0.03    | -0.02    | 0.02     |
|       |               |               | -0.02    | 0.00     | 0.01     | -0.01    | -0.22    | 0.06     |
|       |               |               | -0.03    | 0.00     | 0.00     | -0.01    | 0.39     | 0.00     |
|       |               |               | 0.01     | 0.00     | -0.01    | 0.01     | -0.02    | 0.01     |
|       |               |               | 0.01     | 0.00     | -0.02    | 0.04     | -0.03    | 0.00     |
|       |               |               | -0.01    | 0.01     | 0.00     | 0.01     | -0.02    |          |
|       |               |               |          |          | 0.00     | 0.01     |          |          |
|       |               |               |          |          | 0.00     | 0.00     |          |          |
|       |               |               |          |          | 0.00     | 0.00     |          |          |
|       |               |               |          |          | 0.01     | 0.00     |          |          |
|       |               |               |          |          | 0.00     | -0.01    |          |          |
| comp. | 0.47          | 0.00          | 0.12     | 0.03     | 0.04     | 0.05     | 0.45     | 0.07     |

  

| basis | $\Delta_{oop}$ | $\delta_{oop}$ | $B_{2u}$ | $B_{1u}$ | $A_{2u}$ | $E_g(x)$ | $E_g(y)$ | $A_{1u}$ |
|-------|----------------|----------------|----------|----------|----------|----------|----------|----------|
| min.  | 2.33           | 0.34           | 2.31     | 0.27     | -0.02    | -0.11    | 0.05     | 0.02     |
| ext.  | 2.39           | 0.00           | 2.30     | 0.27     | -0.02    | -0.11    | 0.05     | 0.02     |
|       |                |                | -0.58    | 0.01     | 0.01     | 0.01     | 0.02     | -0.01    |
| total | 2.39           | 0.00           | 2.30     | 0.27     | -0.02    | -0.11    | 0.05     | 0.02     |
|       |                |                | -0.59    | 0.01     | 0.01     | 0.01     | 0.02     | -0.01    |
|       |                |                | -0.06    | 0.01     | 0.00     | 0.01     | 0.00     |          |
|       |                |                |          |          |          | 0.00     | 0.00     |          |
|       |                |                |          |          |          | -0.01    | 0.00     |          |
| comp. | 2.39           | 0.00           | 2.37     | 0.27     | 0.02     | 0.11     | 0.05     | 0.02     |

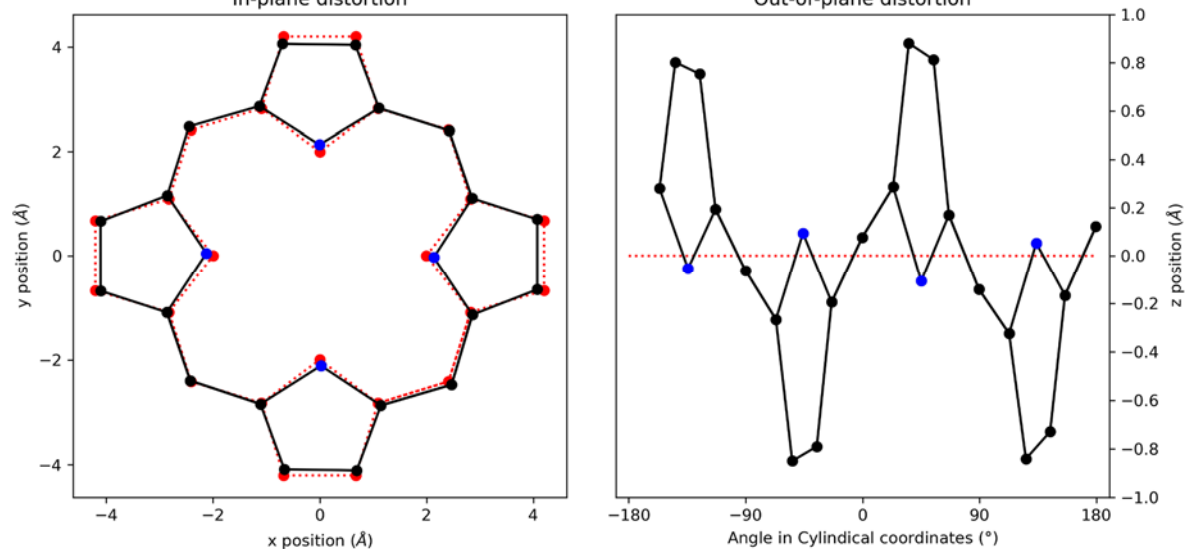

Figure S2.15; (a) out-of-plane and (b) in-plane skeletal plots of the porphyrin core. Porphyrin is represented in black(C) and blue(N), with the reference structure (CuTPP) in red lines.

2.3.16 NSD result generated from file [H<sub>4</sub>21][CF<sub>3</sub>CO<sub>2</sub>]<sub>2</sub>·2CF<sub>3</sub>CO<sub>2</sub>H (5,15-dibromo-10,20-bis(4-tolyl)porphyrindi-ium bis(trifluoroacetate)bis(trifluoroacetic acid) solvate)

Summary of the NSD (in Å):

| basis | $\Delta_{ip}$ | $\delta_{ip}$ | $B_{2g}$ | $B_{1g}$ | $E_u(x)$ | $E_u(y)$ | $A_{1g}$ | $A_{2g}$ |
|-------|---------------|---------------|----------|----------|----------|----------|----------|----------|
| min.  | 0.16          | 0.11          | -0.04    | 0.05     | -0.01    | 0.01     | 0.14     | -0.01    |
| ext.  | 0.22          | 0.09          | -0.04    | 0.05     | -0.01    | 0.01     | 0.14     | -0.01    |
|       |               |               | 0.01     | 0.00     | -0.01    | 0.00     | -0.14    | -0.06    |
| total | 0.38          | 0.00          | -0.04    | 0.05     | -0.01    | 0.01     | 0.16     | -0.01    |
|       |               |               | 0.01     | 0.00     | -0.01    | 0.00     | -0.14    | -0.06    |
|       |               |               | -0.03    | -0.03    | 0.00     | 0.00     | 0.29     | -0.01    |
|       |               |               | 0.02     | 0.00     | 0.00     | -0.01    | -0.02    | -0.01    |
|       |               |               | 0.00     | 0.00     | 0.02     | 0.00     | -0.01    | -0.01    |
|       |               |               | -0.01    | 0.00     | 0.00     | 0.01     | -0.01    | -0.01    |
|       |               |               |          |          | -0.01    | 0.00     |          |          |
|       |               |               |          |          | 0.00     | 0.00     |          |          |
|       |               |               |          |          | 0.00     | 0.00     |          |          |
|       |               |               |          |          | 0.00     | 0.00     |          |          |
|       |               |               |          |          | 0.00     | 0.00     |          |          |
| comp. | 0.38          | 0.00          | 0.06     | 0.06     | 0.03     | 0.01     | 0.36     | 0.06     |

  

| basis | $\Delta_{oop}$ | $\delta_{oop}$ | $B_{2u}$ | $B_{1u}$ | $A_{2u}$ | $E_g(x)$ | $E_g(y)$ | $A_{1u}$ |
|-------|----------------|----------------|----------|----------|----------|----------|----------|----------|
| min.  | 1.73           | 0.32           | 1.69     | -0.33    | -0.07    | 0.01     | -0.03    | 0.00     |
| ext.  | 1.81           | 0.00           | 1.68     | -0.33    | -0.07    | 0.01     | -0.03    | 0.00     |
|       |                |                | -0.56    | -0.01    | 0.04     | -0.02    | -0.05    | -0.01    |
| total | 1.81           | 0.00           | 1.68     | -0.33    | -0.07    | 0.01     | -0.03    | 0.00     |
|       |                |                | -0.56    | -0.01    | 0.04     | -0.02    | -0.05    | -0.01    |
|       |                |                | -0.05    | -0.01    | -0.01    | 0.00     | -0.02    | -0.01    |
|       |                |                |          |          |          | 0.00     | -0.01    |          |
|       |                |                |          |          |          | 0.00     | 0.00     |          |
| comp. | 1.81           | 0.00           | 1.78     | 0.33     | 0.08     | 0.03     | 0.06     | 0.01     |

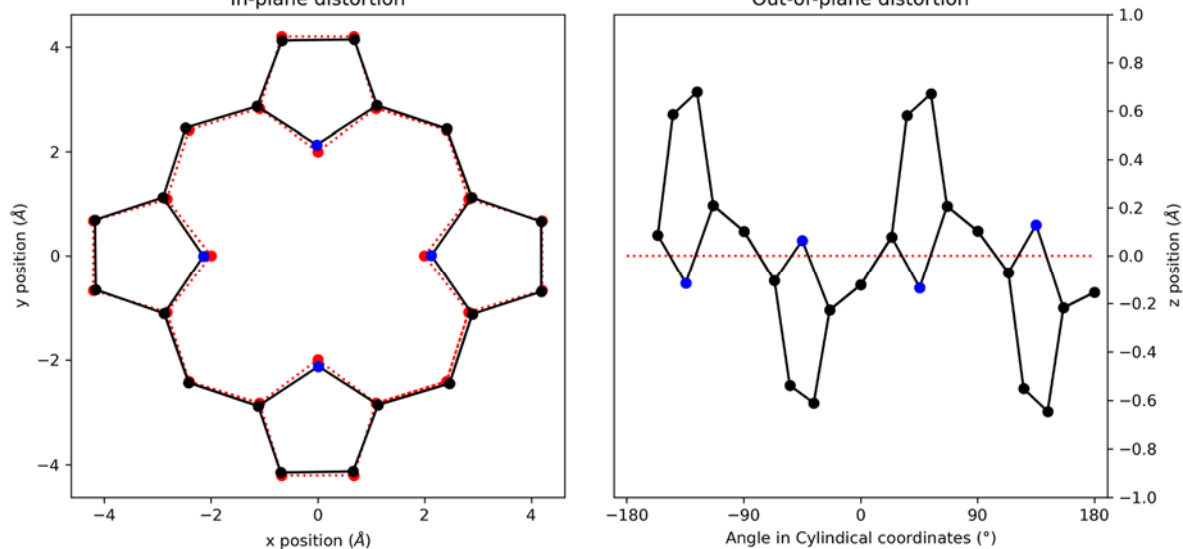

Figure S2.16; (a) out-of-plane and (b) in-plane skeletal plots of the porphyrin core. Porphyrin is represented in black(C) and blue(N), with the reference structure (CuTPP) in red lines.

2.3.17 NSD result generated from [H<sub>8</sub>23][ClO<sub>4</sub>]<sub>4</sub>·2H<sub>2</sub>O (5,5'-Bis(15-hexyl-10,20-bis(4-methoxyphenyl)porphyrindi-ium) tetrakis(perchlorate) diaqua solvate)

Summary of the NSD (in Å):

| basis | $\Delta_{ip}$ | $\delta_{ip}$ | $B_{2g}$ | $B_{1g}$ | $E_u(x)$ | $E_u(y)$ | $A_{1g}$ | $A_{2g}$ |
|-------|---------------|---------------|----------|----------|----------|----------|----------|----------|
| min.  | 0.10          | 0.24          | -0.01    | 0.04     | 0.00     | 0.05     | -0.06    | 0.05     |
| ext.  | 0.30          | 0.16          | -0.01    | 0.04     | -0.01    | 0.06     | -0.06    | 0.05     |
|       |               |               | 0.00     | 0.01     | -0.06    | 0.06     | -0.24    | 0.11     |
| total | 0.49          | 0.00          | -0.01    | 0.04     | -0.01    | 0.05     | -0.04    | 0.05     |
|       |               |               | 0.00     | 0.01     | -0.06    | 0.05     | -0.24    | 0.11     |
|       |               |               | 0.00     | 0.05     | 0.00     | 0.03     | 0.38     | 0.01     |
|       |               |               | -0.01    | 0.00     | 0.03     | -0.03    | -0.02    | 0.01     |
|       |               |               | 0.00     | 0.00     | 0.02     | -0.07    | -0.01    | 0.01     |
|       |               |               | 0.00     | 0.00     | 0.00     | -0.01    | -0.03    |          |
|       |               |               |          |          | 0.01     | 0.00     |          |          |
|       |               |               |          |          | 0.00     | 0.00     |          |          |
|       |               |               |          |          | -0.01    | 0.01     |          |          |
|       |               |               |          |          | 0.00     | 0.01     |          |          |
|       |               |               |          |          | -0.01    | 0.01     |          |          |
| comp. | 0.49          | 0.00          | 0.01     | 0.07     | 0.08     | 0.11     | 0.45     | 0.12     |

  

| basis | $\Delta_{oop}$ | $\delta_{oop}$ | $B_{2u}$ | $B_{1u}$ | $A_{2u}$ | $E_g(x)$ | $E_g(y)$ | $A_{1u}$ |
|-------|----------------|----------------|----------|----------|----------|----------|----------|----------|
| min.  | 2.34           | 0.37           | 2.28     | 0.47     | 0.11     | 0.23     | -0.12    | 0.01     |
| ext.  | 2.41           | 0.01           | 2.27     | 0.47     | 0.11     | 0.23     | -0.12    | 0.01     |
|       |                |                | -0.60    | 0.01     | 0.01     | 0.01     | 0.06     | 0.00     |
| total | 2.41           | 0.00           | 2.27     | 0.47     | 0.11     | 0.23     | -0.12    | 0.01     |
|       |                |                | -0.61    | 0.01     | 0.01     | 0.01     | 0.06     | 0.00     |
|       |                |                | -0.05    | 0.01     | 0.00     | -0.03    | 0.03     |          |
|       |                |                |          |          |          | 0.00     | 0.00     |          |
|       |                |                |          |          |          | 0.02     | -0.02    |          |
| comp. | 2.41           | 0.00           | 2.35     | 0.47     | 0.11     | 0.23     | 0.14     | 0.01     |

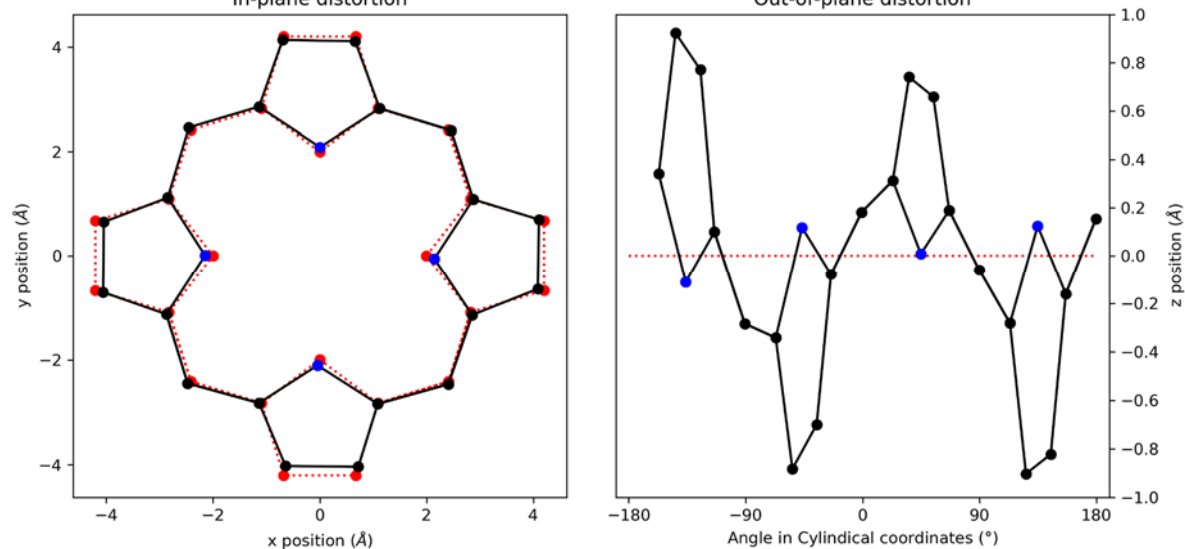

Figure S2.17; (a) out-of-plane and (b) in-plane skeletal plots of the porphyrin core. Porphyrin is represented in black(C) and blue(N), with the reference structure (CuTPP) in red lines.

2.3.18 NSD result generated from  $[H_4\mathbf{22}][MeSO_4]_2 \cdot \frac{1}{4}H_2O$  (5,15-bis(4-ethynylphenyl)-10,20-diphenylporphyrindi-ium bis(methylsulfate) hemiaqua solvate)

Summary of the NSD (in Å):

| basis | $\Delta_{ip}$ | $\delta_{ip}$ | $B_{2g}$ | $B_{1g}$ | $E_u(x)$ | $E_u(y)$ | $A_{1g}$ | $A_{2g}$ |
|-------|---------------|---------------|----------|----------|----------|----------|----------|----------|
| min.  | 0.18          | 0.34          | 0.00     | 0.01     | 0.04     | -0.01    | -0.17    | 0.00     |
| ext.  | 0.36          | 0.24          | 0.00     | 0.01     | 0.04     | -0.01    | -0.17    | 0.00     |
|       |               |               | 0.00     | -0.03    | 0.04     | -0.01    | -0.31    | 0.01     |
| total | 0.60          | 0.00          | 0.00     | 0.00     | 0.04     | -0.01    | -0.15    | 0.00     |
|       |               |               | 0.00     | -0.03    | 0.04     | -0.01    | -0.31    | 0.01     |
|       |               |               | 0.00     | -0.09    | 0.01     | 0.00     | 0.47     | 0.00     |
|       |               |               | -0.01    | 0.00     | -0.01    | 0.01     | -0.03    | 0.00     |
|       |               |               | 0.00     | -0.01    | -0.01    | 0.00     | -0.02    | 0.00     |
|       |               |               | 0.00     | 0.01     | 0.00     | 0.00     | -0.05    |          |
|       |               |               |          |          | 0.00     | 0.00     |          |          |
|       |               |               |          |          | 0.00     | 0.00     |          |          |
|       |               |               |          |          | 0.01     | 0.00     |          |          |
|       |               |               |          |          | 0.00     | 0.00     |          |          |
|       |               |               |          |          | 0.00     | 0.00     |          |          |
| comp. | 0.60          | 0.00          | 0.01     | 0.10     | 0.06     | 0.02     | 0.59     | 0.01     |

  

| basis | $\Delta_{oop}$ | $\delta_{oop}$ | $B_{2u}$ | $B_{1u}$ | $A_{2u}$ | $E_g(x)$ | $E_g(y)$ | $A_{1u}$ |
|-------|----------------|----------------|----------|----------|----------|----------|----------|----------|
| min.  | 2.64           | 0.42           | -2.63    | -0.03    | 0.17     | 0.02     | -0.05    | -0.01    |
| ext.  | 2.70           | 0.00           | -2.62    | -0.03    | 0.17     | 0.02     | -0.05    | -0.01    |
|       |                |                | 0.64     | 0.00     | 0.03     | -0.01    | 0.04     | 0.00     |
| total | 2.70           | 0.00           | -2.62    | -0.03    | 0.17     | 0.02     | -0.05    | -0.01    |
|       |                |                | 0.65     | 0.00     | 0.03     | -0.01    | 0.04     | 0.00     |
|       |                |                | 0.06     | 0.00     | 0.00     | 0.00     | 0.02     |          |
|       |                |                |          |          |          | 0.00     | 0.00     |          |
|       |                |                |          |          |          | 0.00     | -0.01    |          |
| comp. | 2.70           | 0.00           | 2.70     | 0.03     | 0.18     | 0.02     | 0.06     | 0.01     |

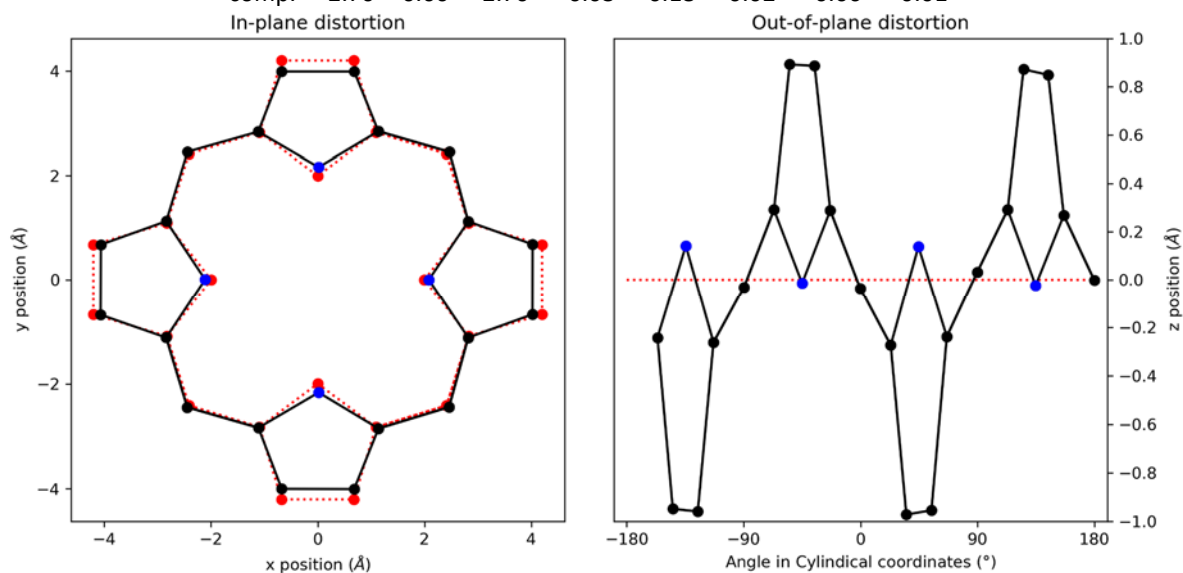

Figure S2.18; (a) out-of-plane and (b) in-plane skeletal plots of the porphyrin core. Porphyrin is represented in black(C) and blue(N), with the reference structure (CuTPP) in red lines.

2.3.19 NSD result generated from [H<sub>4</sub>18][CF<sub>3</sub>CO<sub>2</sub>]<sub>2</sub>·2CF<sub>3</sub>CO<sub>2</sub>H (5,15-bis(4-bromophenyl)porphyrindi-ium bis(trifluoroacetate) bis(trifluoroacetic acid) solvate)  
Summary of the NSD (in Å):

| basis | $\Delta_{ip}$ | $\delta_{ip}$ | $B_{2g}$ | $B_{1g}$ | $E_u(x)$ | $E_u(y)$ | $A_{1g}$ | $A_{2g}$ |
|-------|---------------|---------------|----------|----------|----------|----------|----------|----------|
| min.  | 0.32          | 0.07          | -0.18    | -0.05    | 0.00     | -0.02    | 0.26     | 0.00     |
| ext.  | 0.35          | 0.05          | -0.18    | -0.05    | 0.00     | -0.02    | 0.26     | 0.00     |
|       |               |               | -0.03    | -0.01    | 0.02     | -0.03    | -0.12    | 0.02     |
| total | 0.42          | 0.00          | -0.18    | -0.05    | 0.00     | -0.02    | 0.27     | 0.00     |
|       |               |               | -0.03    | -0.01    | 0.02     | -0.03    | -0.12    | 0.02     |
|       |               |               | -0.01    | 0.01     | 0.00     | 0.00     | 0.22     | 0.00     |
|       |               |               | 0.01     | 0.00     | -0.02    | 0.02     | 0.00     | 0.00     |
|       |               |               | -0.01    | 0.00     | -0.03    | 0.03     | -0.01    | 0.01     |
|       |               |               | -0.01    | 0.00     | 0.00     | 0.00     | 0.00     |          |
|       |               |               |          |          | -0.01    | 0.00     |          |          |
|       |               |               |          |          | 0.00     | 0.00     |          |          |
|       |               |               |          |          | 0.00     | 0.00     |          |          |
|       |               |               |          |          | 0.00     | 0.00     |          |          |
|       |               |               |          |          | 0.01     | 0.00     |          |          |
| comp. | 0.42          | 0.00          | 0.19     | 0.05     | 0.04     | 0.05     | 0.37     | 0.02     |

  

| basis | $\Delta_{oop}$ | $\delta_{oop}$ | $B_{2u}$ | $B_{1u}$ | $A_{2u}$ | $E_g(x)$ | $E_g(y)$ | $A_{1u}$ |
|-------|----------------|----------------|----------|----------|----------|----------|----------|----------|
| min.  | 1.28           | 0.25           | -1.25    | -0.12    | -0.06    | 0.16     | -0.14    | -0.02    |
| ext.  | 1.36           | 0.00           | -1.24    | -0.12    | -0.06    | 0.16     | -0.14    | -0.02    |
|       |                |                | 0.49     | 0.00     | 0.02     | 0.02     | 0.03     | 0.02     |
| total | 1.36           | 0.00           | -1.24    | -0.12    | -0.06    | 0.16     | -0.14    | -0.02    |
|       |                |                | 0.49     | 0.00     | 0.02     | 0.02     | 0.03     | 0.02     |
|       |                |                | 0.04     | 0.00     | -0.01    | -0.01    | 0.00     |          |
|       |                |                |          |          |          | 0.01     | 0.00     |          |
|       |                |                |          |          |          | 0.02     | -0.02    |          |
| comp. | 1.36           | 0.00           | 1.34     | 0.12     | 0.06     | 0.16     | 0.14     | 0.02     |

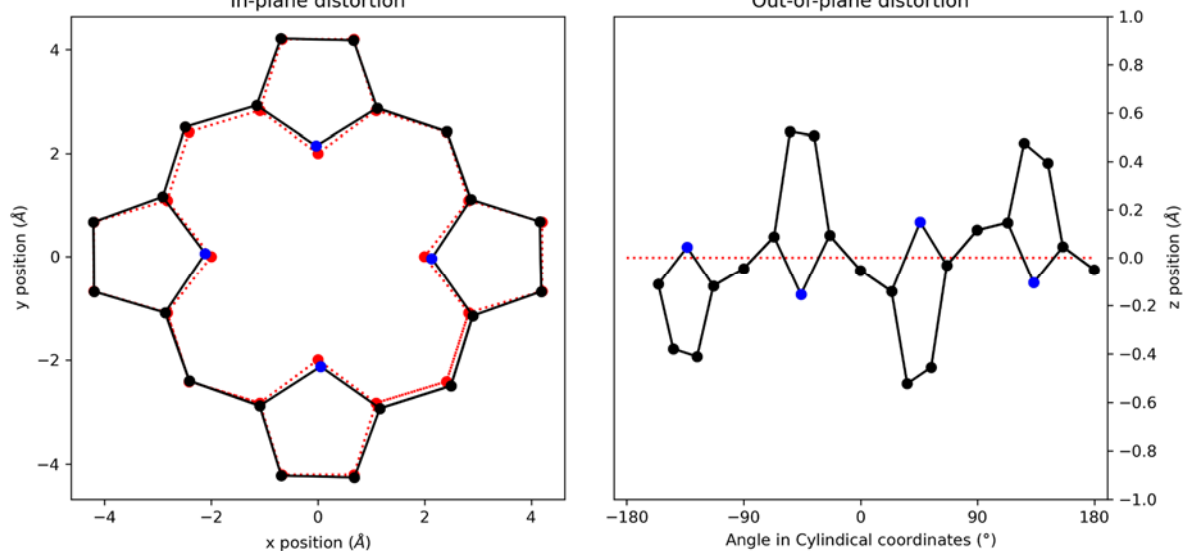

Figure S2.19; (a) out-of-plane and (b) in-plane skeletal plots of the porphyrin core. Porphyrin is represented in black(C) and blue(N), with the reference structure (CuTPP) in red lines.

2.3.20 NSD result generated from  $[H_8\mathbf{24}][CF_3CO_2]_4 \cdot 14H_2O$  (5,5'-bis(10,15,20-triphenylporphyrindi-ium) tetrakis(trifluoroacetate) aqua solvate)

Summary of the NSD (in Å):

| basis | $\Delta_{ip}$ | $\delta_{ip}$ | $B_{2g}$ | $B_{1g}$ | $E_u(x)$ | $E_u(y)$ | $A_{1g}$ | $A_{2g}$ |
|-------|---------------|---------------|----------|----------|----------|----------|----------|----------|
| min.  | 0.20          | 0.09          | 0.07     | 0.03     | 0.00     | -0.01    | 0.18     | 0.00     |
| ext.  | 0.25          | 0.07          | 0.07     | 0.03     | 0.00     | -0.01    | 0.18     | 0.00     |
|       |               |               | 0.00     | -0.01    | 0.01     | 0.00     | -0.15    | 0.00     |
| total | 0.37          | 0.00          | 0.07     | 0.03     | 0.00     | -0.01    | 0.20     | 0.00     |
|       |               |               | 0.00     | -0.01    | 0.01     | 0.00     | -0.15    | 0.00     |
|       |               |               | 0.00     | 0.00     | 0.02     | 0.00     | 0.26     | 0.00     |
|       |               |               | 0.00     | -0.01    | 0.01     | 0.00     | -0.03    | 0.01     |
|       |               |               | 0.01     | 0.01     | 0.03     | 0.01     | 0.00     | 0.00     |
|       |               |               | -0.01    | 0.01     | 0.01     | 0.01     | -0.01    |          |
|       |               |               |          |          | 0.00     | -0.01    |          |          |
|       |               |               |          |          | 0.00     | 0.00     |          |          |
|       |               |               |          |          | 0.01     | 0.01     |          |          |
|       |               |               |          |          | 0.01     | 0.01     |          |          |
|       |               |               |          |          | 0.00     | 0.00     |          |          |
| comp. | 0.37          | 0.00          | 0.07     | 0.03     | 0.04     | 0.02     | 0.36     | 0.01     |

  

| basis | $\Delta_{oop}$ | $\delta_{oop}$ | $B_{2u}$ | $B_{1u}$ | $A_{2u}$ | $E_g(x)$ | $E_g(y)$ | $A_{1u}$ |
|-------|----------------|----------------|----------|----------|----------|----------|----------|----------|
| min.  | 1.55           | 0.31           | -1.54    | 0.01     | -0.01    | 0.05     | 0.03     | 0.01     |
| ext.  | 1.63           | 0.00           | -1.53    | 0.01     | -0.01    | 0.05     | 0.03     | 0.01     |
|       |                |                | 0.55     | -0.01    | -0.03    | 0.04     | 0.07     | -0.01    |
| total | 1.64           | 0.00           | -1.53    | 0.01     | -0.01    | 0.05     | 0.03     | 0.01     |
|       |                |                | 0.55     | -0.01    | -0.03    | 0.04     | 0.07     | -0.01    |
|       |                |                | 0.04     | 0.00     | -0.01    | -0.01    | 0.03     |          |
|       |                |                |          |          |          | 0.00     | 0.02     |          |
|       |                |                |          |          |          | 0.01     | 0.00     |          |
| comp. | 1.64           | 0.00           | 1.63     | 0.02     | 0.04     | 0.07     | 0.09     | 0.02     |

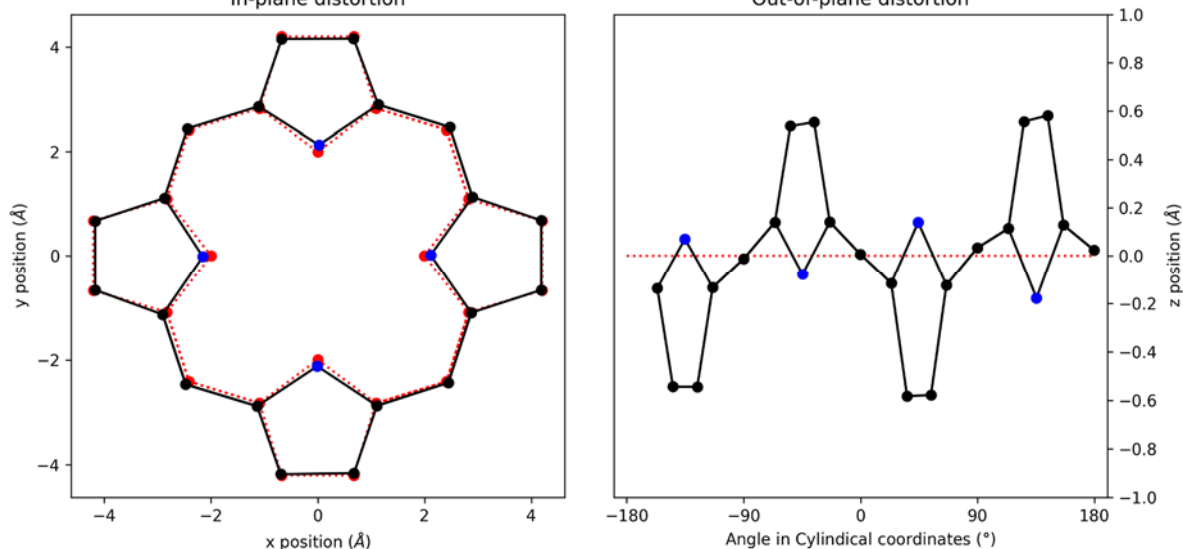

Figure S2.20; (a) out-of-plane and (b) in-plane skeletal plots of the porphyrin core. Porphyrin is represented in black(C) and blue(N), with the reference structure (CuTPP) in red lines.



2.3.21 NSD result generated from CCDC entry ODEFOS (H<sub>2</sub>11 (monoclinic), 5,15-diphenylporphyrin)  
Summary of the NSD (in Å):

| basis | $\Delta_{ip}$  | $\delta_{ip}$  | $B_{2g}$ | $B_{1g}$ | $E_u(x)$ | $E_u(y)$ | $A_{1g}$ | $A_{2g}$ |
|-------|----------------|----------------|----------|----------|----------|----------|----------|----------|
| min.  | 0.45           | 0.00           | -0.42    | -0.02    | -0.01    | 0.00     | 0.17     | -0.01    |
| ext.  | 0.46           | 0.00           | -0.42    | -0.02    | -0.01    | 0.00     | 0.17     | -0.01    |
|       |                |                | -0.09    | -0.06    | 0.00     | 0.01     | -0.01    | -0.01    |
| total | 0.47           | 0.00           | -0.42    | -0.03    | -0.01    | 0.00     | 0.17     | -0.01    |
|       |                |                | -0.09    | -0.06    | 0.00     | 0.01     | -0.01    | -0.01    |
|       |                |                | -0.01    | -0.04    | -0.01    | 0.00     | 0.05     | 0.00     |
|       |                |                | 0.00     | 0.00     | 0.00     | 0.00     | -0.01    | 0.00     |
|       |                |                | -0.01    | 0.01     | 0.00     | 0.00     | 0.01     | 0.00     |
|       |                |                | -0.01    | -0.01    | 0.00     | 0.00     | 0.01     | 0.00     |
|       |                |                |          |          | 0.00     | 0.00     |          |          |
|       |                |                |          |          | 0.00     | 0.00     |          |          |
|       |                |                |          |          | 0.00     | 0.00     |          |          |
|       |                |                |          |          | 0.00     | 0.00     |          |          |
|       |                |                |          |          | 0.00     | 0.00     |          |          |
|       |                |                |          |          | 0.00     | 0.00     |          |          |
| comp. | 0.47           | 0.00           | 0.43     | 0.08     | 0.01     | 0.01     | 0.18     | 0.01     |
| basis | $\Delta_{oop}$ | $\delta_{oop}$ | $B_{2u}$ | $B_{1u}$ | $A_{2u}$ | $E_g(x)$ | $E_g(y)$ | $A_{1u}$ |
| min.  | 0.43           | 0.00           | 0.13     | -0.40    | 0.05     | 0.07     | -0.03    | 0.00     |
| ext.  | 0.44           | 0.00           | 0.13     | -0.40    | 0.05     | 0.07     | -0.03    | 0.00     |
|       |                |                | -0.07    | 0.00     | -0.01    | -0.06    | 0.08     | -0.01    |
| total | 0.45           | 0.00           | 0.13     | -0.40    | 0.05     | 0.07     | -0.03    | 0.00     |
|       |                |                | -0.07    | 0.00     | -0.01    | -0.06    | 0.08     | -0.01    |
|       |                |                | 0.00     | 0.00     | 0.00     | -0.02    | 0.02     |          |
|       |                |                |          |          |          | -0.01    | 0.00     |          |
|       |                |                |          |          |          | 0.01     | -0.01    |          |
| comp. | 0.45           | 0.00           | 0.15     | 0.40     | 0.05     | 0.09     | 0.09     | 0.01     |

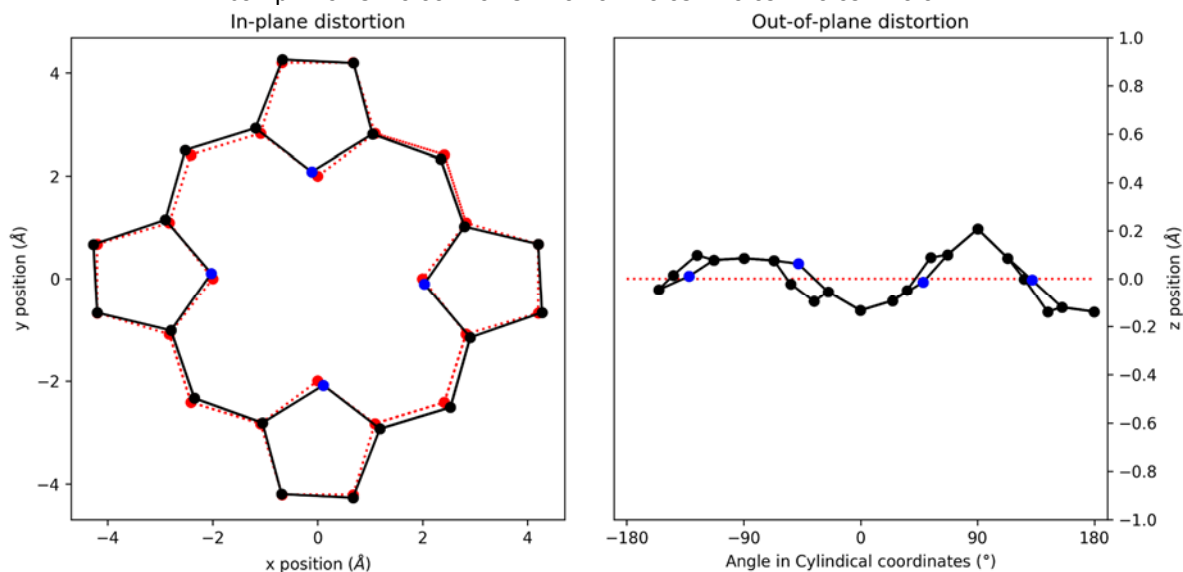

Figure S2.21; (a) out-of-plane and (b) in-plane skeletal plots of the porphyrin core. Porphyrin is represented in black(C) and blue(N), with the reference structure (CuTPP) in red lines.

### 2.3.22 NSD result generated from CCDC entry MOSQEQ (H<sub>2</sub>14 5,10,15-triphenylporphyrin)

Summary of the NSD (in Å):

| basis | $\Delta_{ip}$ | $\delta_{ip}$ | $B_{2g}$ | $B_{1g}$ | $E_u(x)$ | $E_u(y)$ | $A_{1g}$ | $A_{2g}$ |
|-------|---------------|---------------|----------|----------|----------|----------|----------|----------|
| min.  | 0.27          | 0.00          | -0.21    | -0.03    | -0.02    | 0.03     | 0.16     | 0.01     |
| ext.  | 0.28          | 0.00          | -0.21    | -0.03    | -0.02    | 0.03     | 0.16     | 0.02     |
| total | 0.29          | 0.00          | -0.21    | -0.03    | -0.02    | 0.03     | 0.16     | 0.02     |
|       |               |               | -0.05    | -0.07    | 0.04     | -0.02    | 0.00     | 0.01     |
|       |               |               | -0.01    | -0.05    | 0.01     | 0.00     | 0.04     | 0.00     |
|       |               |               | 0.00     | 0.00     | -0.01    | 0.00     | -0.01    | 0.00     |
|       |               |               | 0.00     | 0.01     | 0.00     | -0.01    | 0.01     | 0.01     |
|       |               |               | -0.01    | -0.01    | 0.01     | 0.00     | 0.02     |          |
|       |               |               |          |          | 0.00     | 0.00     |          |          |
|       |               |               |          |          | -0.01    | -0.01    |          |          |
|       |               |               |          |          | 0.00     | 0.00     |          |          |
|       |               |               |          |          | 0.00     | 0.00     |          |          |
|       |               |               |          |          | 0.00     | 0.00     |          |          |
| comp. | 0.29          | 0.00          | 0.21     | 0.09     | 0.04     | 0.03     | 0.17     | 0.02     |

  

| basis | $\Delta_{oop}$ | $\delta_{oop}$ | $B_{2u}$ | $B_{1u}$ | $A_{2u}$ | $E_g(x)$ | $E_g(y)$ | $A_{1u}$ |
|-------|----------------|----------------|----------|----------|----------|----------|----------|----------|
| min.  | 0.70           | 0.01           | 0.22     | 0.64     | 0.12     | -0.14    | 0.03     | 0.01     |
| ext.  | 0.72           | 0.00           | 0.22     | 0.64     | 0.12     | -0.14    | 0.03     | 0.01     |
|       |                |                | -0.04    | 0.01     | -0.03    | -0.13    | -0.05    | 0.00     |
| total | 0.72           | 0.00           | 0.22     | 0.64     | 0.12     | -0.14    | 0.03     | 0.01     |
|       |                |                | -0.04    | 0.01     | -0.03    | -0.13    | -0.05    | 0.00     |
|       |                |                | 0.00     | 0.01     | 0.00     | -0.01    | -0.01    |          |
|       |                |                |          |          |          | 0.01     | -0.01    |          |
|       |                |                |          |          |          | 0.00     | 0.01     |          |
| comp. | 0.72           | 0.00           | 0.23     | 0.64     | 0.12     | 0.19     | 0.06     | 0.01     |

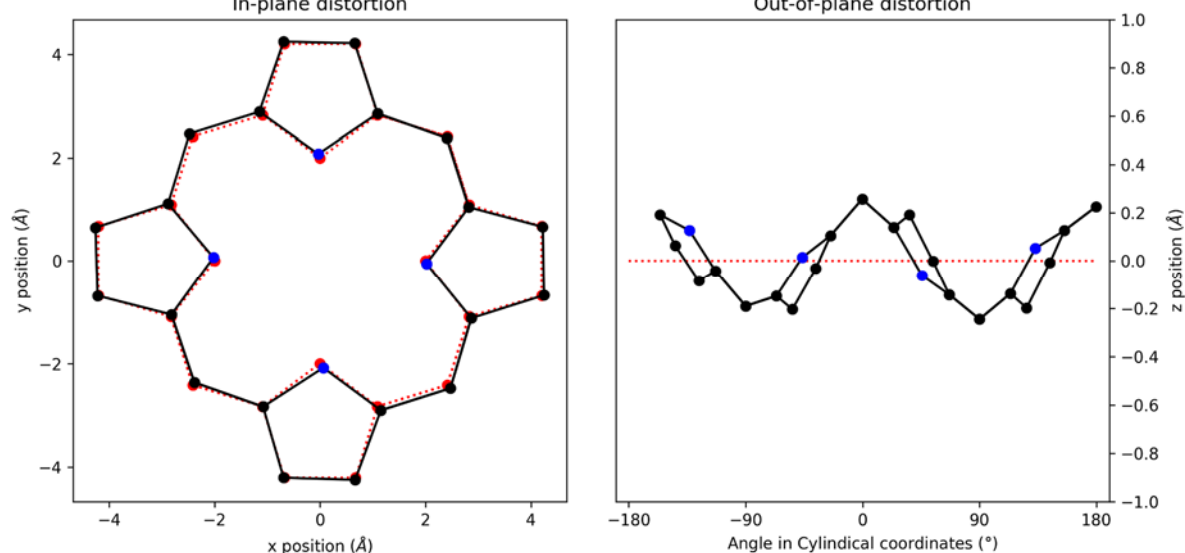

Figure S2.22; (a) out-of-plane and (b) in-plane skeletal plots of the porphyrin core. Porphyrin is represented in black(C) and blue(N), with the reference structure (CuTPP) in red lines.

### S3. Supplemental Images and tables

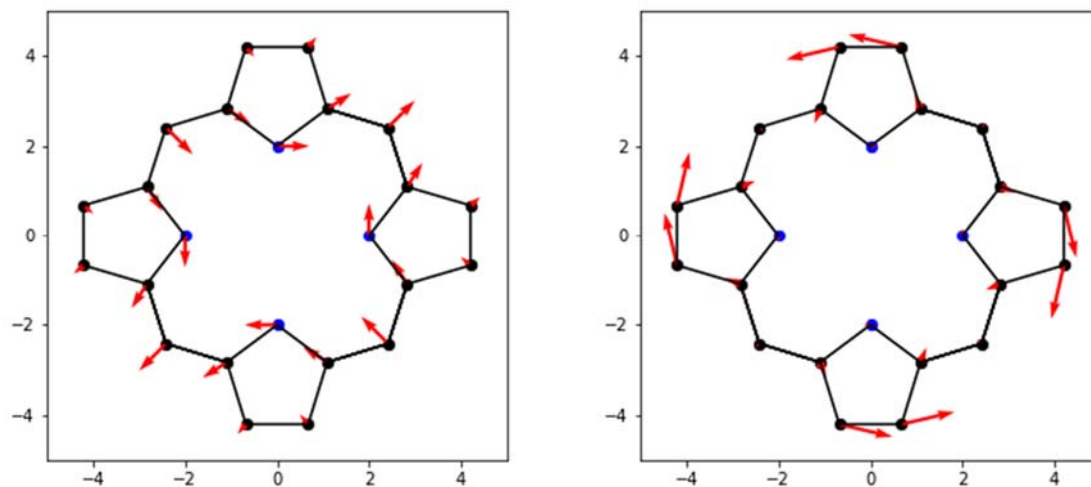

Figure S3.1; The NSD distortion modes (a)  $B_{2g}(1)$  and (b)  $B_{2g}(2)$  from the reference structure (CuTPP); arrows represent a 1 Å deviation along each distortion mode.

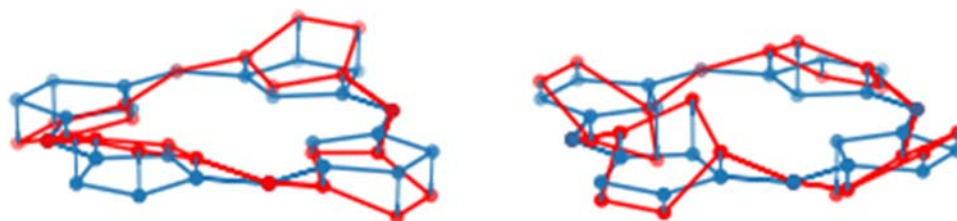

Figure S3.2; The NSD-identified distortion modes (a)  $B_{2u}(1)$  and (b)  $B_{2u}(2)$ ; The reference CuTPP structure is shown in blue, and the red skeleton represents a 4 Å deviation along each distortion mode.

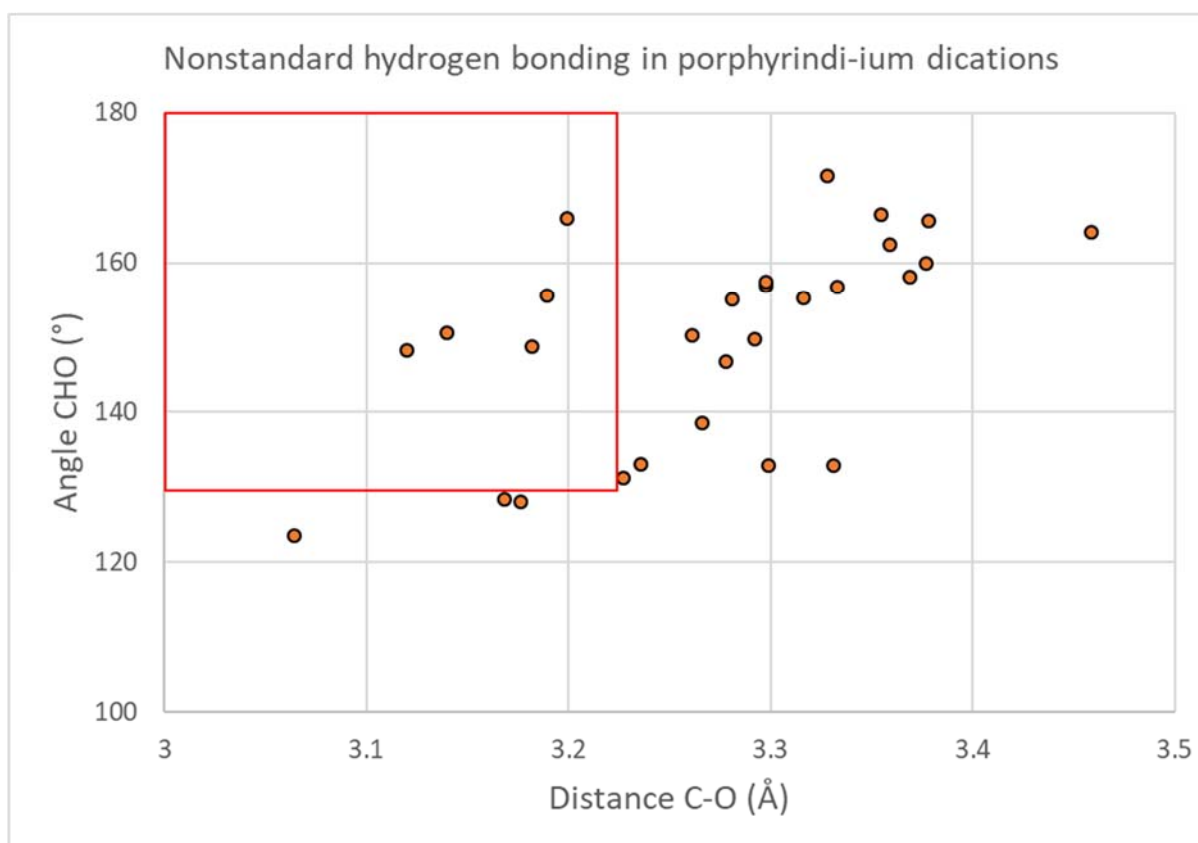

Figure S3.3; a plot of the critical parameters for non-standard hydrogen bonding in crystal structures of porphyrindi-ium dications. The red box indicates those relationships which fall into the definition of strong H-bonds (i.e. less than the sum of the van der Waals radii of the donor and acceptor atoms and approximately linear) as outlined by Steiner<sup>[32]</sup>

Table S3.4; Non-standard C-H...O close contacts in previously reported porphyrin molecules from the CCDC CSD

| CCDC identifier | Link to paper (doi)                                                                                   | Compound Name                                                                                                                                                                                                                | D-A distance | D-H-A angle |
|-----------------|-------------------------------------------------------------------------------------------------------|------------------------------------------------------------------------------------------------------------------------------------------------------------------------------------------------------------------------------|--------------|-------------|
| Meso- donors    |                                                                                                       |                                                                                                                                                                                                                              |              |             |
| MANHOZ          | <a href="http://dx.doi.org/10.1016/j.tet.2005.01.128">http://dx.doi.org/10.1016/j.tet.2005.01.128</a> | 5-(3,5-Dimethoxyphenyl)porphyrin bis(trifluoroacetate)                                                                                                                                                                       | 3.215        | 167.106     |
| NAWYOZ          | <a href="http://dx.doi.org/10.1002/anie.199724971">http://dx.doi.org/10.1002/anie.199724971</a>       | 5,11,17,23-tetrakis((1,2,6,7-Tetraethylporphyrin-15-yl)-nickel)-25,26,27,28-tetrahydroxycalix(4)arene methanol solvate                                                                                                       | 3.106        | 152.632     |
| Beta- donors    |                                                                                                       |                                                                                                                                                                                                                              |              |             |
| AYULOX          | <a href="http://dx.doi.org/10.1039/C6TC03957J">http://dx.doi.org/10.1039/C6TC03957J</a>               | 1-methyl-4-(10,15,20-tris(1-methylpyridinium-4-yl)porphyrin-5-yl)pyridinium 4-(10,15,20-tris(4-sulfonatophenyl)porphyrin-5-yl)benzenesulfonate hydrate                                                                       | 3.17         | 161.212     |
| ECIKIL          | <a href="http://dx.doi.org/10.1002/ejoc.200500685">http://dx.doi.org/10.1002/ejoc.200500685</a>       | alpha-5,15-beta-10,20-bis(2,2'-(3,3'-(2,2-bis(Ethoxycarbonyl)propane-1,3-diyl)dibenzoylamino)diphenyl)porphyrin                                                                                                              | 3.181        | 144.756     |
| EMOREF          | <a href="http://dx.doi.org/10.1016/j.ica.2016.05.038">http://dx.doi.org/10.1016/j.ica.2016.05.038</a> | 2,2',2'',2'''-(porphyrin-5,10,15,20-tetrayltetrakis((2,3,5,6-tetrafluoro-4,1-phenylene)oxy))tetraethanol dimethyl sulfoxide solvate                                                                                          | 3.217        | 143.15      |
| ERAKOY          | <a href="http://dx.doi.org/10.1021/ic902309f">http://dx.doi.org/10.1021/ic902309f</a>                 | (5,10,15,20-tetrakis(2-(Pivaloylamino)phenyl)porphyrinato)-(2-methylimidazole-N $\delta$ 3!)-(2-methylimidazolato)-cobalt(iii) benzene solvate                                                                               | 3.184        | 141.78      |
| HABSEL          | <a href="http://dx.doi.org/10.1002/cssc.201402242">http://dx.doi.org/10.1002/cssc.201402242</a>       | N-phenyl-6-(10,15,20-tris(3,4,5-trimethoxyphenyl)porphyrin-5-yl)dibenzo[b,d]furan-4-carboxamide acetonitrile solvate                                                                                                         | 3.194        | 161.396     |
| HONVOX          | <a href="http://dx.doi.org/10.1246/cl.140392">http://dx.doi.org/10.1246/cl.140392</a>                 | 4,4',4'',4'''-Porphyrin-5,10,15,20-tetrayltetrakis(1-(3-(acetylsulfanyl)propyl)pyridinium) 4,4',4'',4'''-porphyrin-5,10,15,20-tetrayltetrabenzene sulfonate acetonitrile solvate tetrahydrate                                | 3.167        | 145.788     |
| KIBMEN          | SENGE, M.O.; Z Naturforsch B: Chem Sci, 2000, 55, 336                                                 | 22,24-Dihydro-5,10,15,20-tetraisopropylporphyrin-di-ium bis(trifluoroacetate) trifluoroacetic acid solvate chloroform solvate                                                                                                | 3.193        | 150.339     |
| LIHMAR          | <a href="http://dx.doi.org/10.1039/b616884a">http://dx.doi.org/10.1039/b616884a</a>                   | 20-(2,7-Di-t-butyl-4-carboxy-9,9-dimethylxanthen-5-yl)-5,10,15-tris(perfluorophenyl)porphyrin                                                                                                                                | 3.153        | 165.789     |
| NALZAD          | <a href="http://dx.doi.org/10.1021/ic200243y">http://dx.doi.org/10.1021/ic200243y</a>                 | (mu! $\delta$ -4'-Methyl-N-(4-(10,15,20-triphenylporphyrin-5-yl)phenyl)-2,2'-bipyridine-4-carboxamide)-tricarbonyl-isothiocyanato-palladium(ii)-rhenium(i) benzene solvate                                                   | 3.186        | 149.176     |
| PEMQEF          | <a href="http://dx.doi.org/10.1021/ja307349d">http://dx.doi.org/10.1021/ja307349d</a>                 | (mu! $\delta$ -5,15:10,20-bis(2,2'-(2-carboxypropane-1,3-diyl)bis(benzene-3,1-diylcarbonylimino)diphenyl)porphyrinato)-bis(acetato)-diaqua-di-bismuth(iii) chloroform unknown solvate                                        | 3.139        | 146.089     |
| QOLZUM          | <a href="http://dx.doi.org/10.1021/ja003184q">http://dx.doi.org/10.1021/ja003184q</a>                 | (5,10,15,20-tetrakis(Pentafluorophenyl)porphyrinato)-dioxo-osmium methanol solvate                                                                                                                                           | 3.163        | 147.185     |
| VATYAQ          | <a href="http://dx.doi.org/10.1021/ja982052i">http://dx.doi.org/10.1021/ja982052i</a>                 | (alpha,alpha,alpha,alpha)-5,10,15,20-tetrakis(2-(4-Chlorophenylurea)phenyl)porphyrin tetra-n-butylammonium bromide dimethylsulfoxide solvate                                                                                 | 3.169        | 140.482     |
| WEYYUW          | <a href="http://dx.doi.org/10.1039/C3CE27064E">http://dx.doi.org/10.1039/C3CE27064E</a>               | Dimethanol-(5,10,15,20-tetraphenylporphyrinato)-manganese bis(mu-2-cyano)-dicyano-(5,10,15,20-tetraphenylporphyrinato)-bis(1,2-bis(pyridine-2-carboxamido)-4-methylbenzenate)-di-cobalt-manganese methanol solvate dihydrate | 3.203        | 142.485     |

Table S3.5; Non-standard C-H...X (X = O, S, F) close contacts from the porphyrin core in porphyrindium molecules reported in this paper.

| Structure                                                                                              | Donor | H    | Acceptor | Distance C...O (Å) | Angle C-H...O (°) |
|--------------------------------------------------------------------------------------------------------|-------|------|----------|--------------------|-------------------|
| [H <sub>4</sub> 11][CF <sub>3</sub> CO <sub>2</sub> ] <sub>2</sub>                                     | C10   | H10  | O2A      | 3.298              | 156.96            |
|                                                                                                        | C18   | H18  | O2B      | 3.064              | 123.5             |
|                                                                                                        | C20   | H20  | O2B      | 3.182              | 148.8             |
|                                                                                                        | C2    | H2   | O2B      | 3.299              | 132.94            |
| [H <sub>4</sub> 11][CF <sub>3</sub> CO <sub>2</sub> ] <sub>2</sub> ·2CF <sub>3</sub> CO <sub>2</sub> H | C308  | H308 | O4A      | 3.333              | 156.84            |
|                                                                                                        | C307  | H307 | O4S      | 3.176              | 128.12            |
|                                                                                                        | C302  | H302 | O2A      | 3.236              | 133.06            |
|                                                                                                        | C318  | H318 | O1B      | 3.14               | 150.65            |
|                                                                                                        | C12   | H12  | O8A      | 3.266              | 138.54            |
|                                                                                                        | C2    | H2   | O3S      | 3.369              | 158.14            |
|                                                                                                        | C17   | H17  | O2B      | 3.281              | 155.1             |
|                                                                                                        | C18   | H18  | O6A      | 3.278              | 146.7             |
| [H <sub>4</sub> 13][CF <sub>3</sub> CO <sub>2</sub> ] <sub>2</sub>                                     | C3    | H3A  | O1A      | 3.189              | 155.6             |
|                                                                                                        | C10   | H10A | O1A      | 3.292              | 149.8             |
| [H <sub>4</sub> 14][CF <sub>3</sub> CO <sub>2</sub> ] <sub>2</sub>                                     | C20   | H20  | O2A      | 3.199              | 165.9             |
|                                                                                                        | C17   | H17  | O3A      | 3.316              | 155.29            |
| [H <sub>4</sub> 17][CF <sub>3</sub> CO <sub>2</sub> ] <sub>2</sub> ·2CF <sub>3</sub> CO <sub>2</sub> H | C2    | H2   | O1       | 3.298              | 157.38            |
|                                                                                                        | C8    | H8   | O3S      | 3.378              | 165.65            |
| [H <sub>4</sub> 18][ClO <sub>4</sub> ] <sub>2</sub>                                                    | C10   | H10A | O6       | 3.261              | 150.2             |
|                                                                                                        | C12   | H12A | O6       | 3.331              | 132.9             |
|                                                                                                        | C20   | H20A | O3A      | 3.12               | 148.3             |
|                                                                                                        | C2    | H2A  | O3A      | 3.168              | 128.35            |
| [H <sub>4</sub> 18][CF <sub>3</sub> CO <sub>2</sub> ] <sub>2</sub> ·2CF <sub>3</sub> CO <sub>2</sub> H | C8    | H8A  | O1S      | 3.359              | 162.38            |
|                                                                                                        | C18   | H18A | O2A      | 3.459              | 164.12            |
| [H <sub>4</sub> 19][CF <sub>3</sub> CO <sub>2</sub> ] <sub>2</sub> ·2CF <sub>3</sub> CO <sub>2</sub> H | C8    | H8A  | O6S      | 3.328              | 171.6             |
|                                                                                                        | C12   | H12A | O8S      | 3.377              | 159.94            |
|                                                                                                        | C18   | H18A | S1       | 3.681              | 159.25            |
| [H <sub>4</sub> 21][CF <sub>3</sub> CO <sub>2</sub> ] <sub>2</sub> ·2CF <sub>3</sub> CO <sub>2</sub> H | C3    | H3   | O6S      | 3.227              | 131.17            |
|                                                                                                        | C12   | H12  | O5S      | 3.355              | 166.45            |
|                                                                                                        | C17   | H17  | F7S      | 3.51               | 157.86            |
